# Supplementary material for: Computational study of the structure, UV-vis absorption spectra and conductivity of biphenylene-based polymers and their boron nitride analogues
Source: Royal Society of Chemistry journal article supplement (doi:10.1039/c6ra06832d), 2016-01-01
Supplement: c6ra06832d1.pdf [file c6ra06832d1.pdf]

# Computational study of the structure, UV-vis absorption spectra and conductivity of biphenylene-based polymers and their boron nitride analogues

Nataliya N. Karaush,<sup>\*a</sup> Sergey V. Bondarchuk,<sup>a</sup> Gleb V. Baryshnikov,<sup>a,c</sup>  
Valentina A. Minaeva,<sup>a</sup> Wen-Hua Sun<sup>b</sup> and Boris F. Minaev<sup>a,b</sup>

<sup>a</sup>*Bohdan Khmelnytsky National University, Cherkasy, 18031, Ukraine;*

*E-mail: karaush22@ukr.net, [bfmin@rambler.ru](mailto:bfmin@rambler.ru)*

<sup>b</sup>*Key Laboratory of Engineering Plastics and Beijing National Laboratory for  
Molecular Science, Institute of Chemistry, Chinese Academy of Science, 100190  
Beijing, China*

<sup>c</sup>*Department of Theoretical Chemistry and Biology, School of Biotechnology, KTH  
Royal Institute of Technology, SE-106 91 Stockholm, Sweden*

## Electronic Supplementary Information

### List of Content

|                                                                                                                                                                                 |            |
|---------------------------------------------------------------------------------------------------------------------------------------------------------------------------------|------------|
| Figure S1. The optimized structure and bond lengths for the S <sub>0</sub> state of the simplest boron nitride ribbon <b>2</b> calculated at the B3LYP/6-31G(d) level of theory | <b>p.2</b> |
| Table S1. Total energy of the ground singlet state of the biphenylene- and boron nitride compounds                                                                              | <b>p.3</b> |
| Table S2. Selected vertical transitions for the 1D and 2D Bp-based compounds                                                                                                    | <b>p.4</b> |
| Table S3. Selected vertical transitions for the 1D and 2D BN-based compounds                                                                                                    | <b>p.5</b> |
| Optimized Cartesian coordinates of biphenylene-based nanoclusters and their boron nitride analogues (Tables S4–S41)                                                             | <b>p.6</b> |

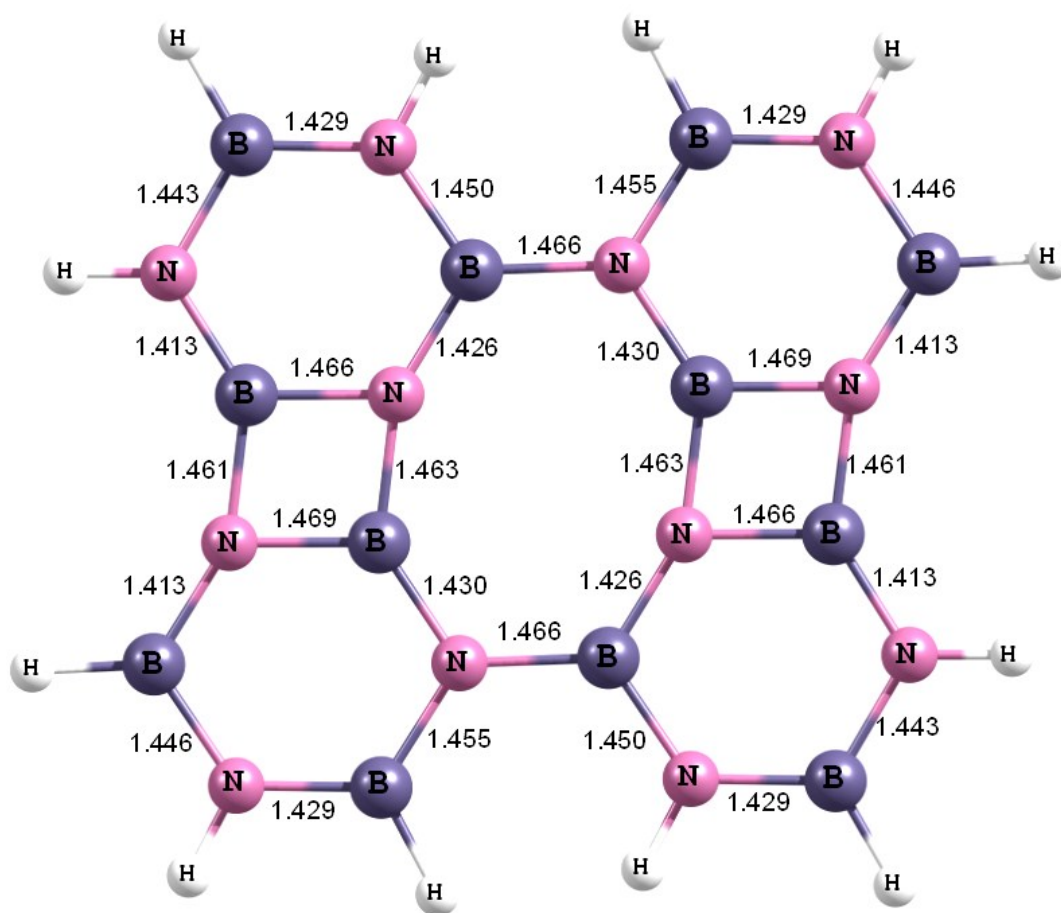

**Figure S1.** The optimized structure and bond lengths for the  $S_0$  state of the simplest boron nitride ribbon **2** calculated at the B3LYP/6-31G(d) level of theory.

**Table S1.** Total energy of the ground singlet state of the biphenylene- and boron nitride compounds calculated at the B3LYP/6–31G(d) level of theory

| Biphenylene compounds     | n×m   | $E_{tot}, a.u.$ | Boron nitride compounds   | n×m   | $E_{tot}, a.u.$ |
|---------------------------|-------|-----------------|---------------------------|-------|-----------------|
| <b>1</b>                  | 3×1.5 | –2068.3054      | <b>1</b>                  | 3×1.5 | –2162.8022      |
| <b>2</b>                  | 3×2   | –2755.2797      | <b>2</b>                  | 3×2   | –2881.3638      |
| <b>3</b>                  | 3×3   | –4129.2283      | <b>3</b>                  | 3×3   | –4318.4869      |
| <b>4</b>                  | 4×2   | –3672.11976     | <b>4</b>                  | 4×2   | –3840.2776      |
| 1D armchair ribbons (m=1) | 1     | –462.0320       | 1D armchair ribbons (m=1) | 1     | –482.9572       |
|                           | 2     | –921.6809       |                           | 2     | –963.5994       |
|                           | 3     | –1381.3305      |                           | 3     | –1444.2423      |
|                           | 4     | –1840.9801      |                           | 4     | –1924.8854      |
|                           | 5     | –2300.6297      |                           | 5     | –2405.5282      |
|                           | 6     | –2760.2793      |                           | 6     | –2886.1712      |
|                           | 7     | –3219.9289      |                           | 7     | –3366.8142      |
|                           | 8     | –3679.5786      |                           | 8     | –3847.4572      |
|                           | 9     | –4139.2282      |                           | 9     | –4328.1002      |
|                           | 10    | –4598.8778      |                           | 10    | –4808.7432      |
| 1D zigzag ribbons (n=2)   | 2     | –1838.4396      | 1D zigzag ribbons (n=2)   | 2     | –1922.4502      |
|                           | 3     | –2755.1975      |                           | 3     | –2881.3017      |
|                           | 4     | –3671.9554      |                           | 4     | –3840.1531      |
|                           | 5     | –4588.7133      |                           | 5     | –4799.0044      |

**Table S2.** The absorption maxima ( $\lambda$ ), assignment and oscillator strength ( $f$ ) in the electronic absorption spectra of the Bp-based ribbons and sheets calculated by the TD DFT/B3LYP/6-31G(d) method

| n×m                           | State           | Assignment                                                      | $\lambda_{\max}$ ,<br>nm | $f$   | State           | Assignment                                                      | $\lambda_{\max}$ ,<br>nm | $f$   |
|-------------------------------|-----------------|-----------------------------------------------------------------|--------------------------|-------|-----------------|-----------------------------------------------------------------|--------------------------|-------|
|                               | I band          |                                                                 |                          |       | II band         |                                                                 |                          |       |
| <b>1D armchair Bp-ribbons</b> |                 |                                                                 |                          |       |                 |                                                                 |                          |       |
| 1×1                           | S <sub>2</sub>  | X <sup>1</sup> A <sub>g</sub> → 1 <sup>1</sup> B <sub>1u</sub>  | 310                      | 0.084 | S <sub>4</sub>  | X <sup>1</sup> A <sub>g</sub> → 2 <sup>1</sup> B <sub>1u</sub>  | 231                      | 1.146 |
| 2×1                           | S <sub>3</sub>  | X <sup>1</sup> A <sub>g</sub> → 1 <sup>1</sup> B <sub>2u</sub>  | 407                      | 0.059 | S <sub>6</sub>  | X <sup>1</sup> A <sub>g</sub> → 3 <sup>1</sup> B <sub>2u</sub>  | 332                      | 0.087 |
| 3×1                           | S <sub>5</sub>  | X <sup>1</sup> A <sub>g</sub> → 3 <sup>1</sup> B <sub>2u</sub>  | 419                      | 0.089 | S <sub>13</sub> | X <sup>1</sup> A <sub>g</sub> → 1 <sup>1</sup> B <sub>1u</sub>  | 331                      | 0.488 |
| 4×1                           | S <sub>7</sub>  | X <sup>1</sup> A <sub>g</sub> → 3 <sup>1</sup> B <sub>2u</sub>  | 436                      | 0.051 | S <sub>16</sub> | X <sup>1</sup> A <sub>g</sub> → 1 <sup>1</sup> B <sub>1u</sub>  | 360                      | 0.914 |
|                               | S <sub>8</sub>  | X <sup>1</sup> A <sub>g</sub> → 4 <sup>1</sup> B <sub>2u</sub>  | 430                      | 0.033 |                 |                                                                 |                          |       |
| 5×1                           | S <sub>9</sub>  | X <sup>1</sup> A <sub>g</sub> → 5 <sup>1</sup> B <sub>2u</sub>  | 446                      | 0.030 | S <sub>21</sub> | X <sup>1</sup> A <sub>g</sub> → 1 <sup>1</sup> B <sub>1u</sub>  | 380                      | 1.355 |
| 6×1                           | S <sub>11</sub> | X <sup>1</sup> A <sub>g</sub> → 5 <sup>1</sup> B <sub>2u</sub>  | 456                      | 0.021 | S <sub>25</sub> | X <sup>1</sup> A <sub>g</sub> → 1 <sup>1</sup> B <sub>1u</sub>  | 394                      | 1.803 |
|                               | S <sub>13</sub> | X <sup>1</sup> A <sub>g</sub> → 6 <sup>1</sup> B <sub>2u</sub>  | 453                      | 0.016 |                 |                                                                 |                          |       |
| 7×1                           | S <sub>15</sub> | X <sup>1</sup> A <sub>g</sub> → 8 <sup>1</sup> B <sub>2u</sub>  | 457                      | 0.068 | –               | –                                                               | –                        | –     |
| 8×1                           | S <sub>17</sub> | X <sup>1</sup> A <sub>g</sub> → 8 <sup>1</sup> B <sub>2u</sub>  | 460                      | 0.063 | –               | –                                                               | –                        | –     |
| 9×1                           | S <sub>19</sub> | X <sup>1</sup> A <sub>g</sub> → 10 <sup>1</sup> B <sub>2u</sub> | 463                      | 0.067 | –               | –                                                               | –                        | –     |
| 10×1                          | S <sub>24</sub> | X <sup>1</sup> A <sub>g</sub> → 12 <sup>1</sup> B <sub>2u</sub> | 461                      | 0.034 | –               | –                                                               | –                        | –     |
| <b>1D zigzag Bp-ribbons</b>   |                 |                                                                 |                          |       |                 |                                                                 |                          |       |
| 2×2                           | S <sub>5</sub>  | X <sup>1</sup> A <sub>g</sub> → 3 <sup>1</sup> B <sub>1u</sub>  | 583                      | 0.586 | S <sub>17</sub> | X <sup>1</sup> A <sub>g</sub> → 8 <sup>1</sup> B <sub>1u</sub>  | 376                      | 0.115 |
| 2×3                           | S <sub>6</sub>  | X <sup>1</sup> A <sub>g</sub> → 3 <sup>1</sup> B <sub>1u</sub>  | 734                      | 1.391 | S <sub>12</sub> | X <sup>1</sup> A <sub>g</sub> → 4 <sup>1</sup> B <sub>2u</sub>  | 584                      | 0.021 |
| 2×4                           | S <sub>9</sub>  | X <sup>1</sup> A <sub>g</sub> → 3 <sup>1</sup> B <sub>1u</sub>  | 854                      | 2.370 | –               | –                                                               | –                        | –     |
| 2×5                           | S <sub>10</sub> | X <sup>1</sup> A <sub>g</sub> → 3 <sup>1</sup> B <sub>1u</sub>  | 957                      | 3.422 | –               | –                                                               | –                        | –     |
| <b>2D Bp-sheet</b>            |                 |                                                                 |                          |       |                 |                                                                 |                          |       |
| 3×1.5                         | S <sub>6</sub>  | X <sup>1</sup> A <sub>g</sub> → 3 <sup>1</sup> B <sub>2u</sub>  | 552                      | 0.262 | S <sub>24</sub> | X <sup>1</sup> A <sub>g</sub> → 11 <sup>1</sup> B <sub>1u</sub> | 362                      | 0.111 |
| 3×2                           | S <sub>7</sub>  | X <sup>1</sup> A <sub>g</sub> → 2 <sup>1</sup> B <sub>1u</sub>  | 675                      | 0.455 | S <sub>24</sub> | X <sup>1</sup> A <sub>g</sub> → 10 <sup>1</sup> B <sub>1u</sub> | 460                      | 0.251 |
| 3×3                           | S <sub>7</sub>  | X <sup>1</sup> A <sub>g</sub> → 1 <sup>1</sup> B <sub>1u</sub>  | 885                      | 1.029 | –               | –                                                               | –                        | –     |
| 4×2                           | S <sub>8</sub>  | X <sup>1</sup> A <sub>g</sub> → 4 <sup>1</sup> B <sub>2u</sub>  | 729                      | 0.380 | S <sub>25</sub> | X <sup>1</sup> A <sub>g</sub> → 12 <sup>1</sup> B <sub>2u</sub> | 538                      | 0.295 |

**Table S3.** The wavelength ( $\lambda$ ), assignment and oscillator strength ( $f$ ) in the electronic absorption spectra of the BN-based ribbons and sheets calculated by the TD DFT/B3LYP/6-31G(d) method

| $n \times m$                  | State           | Assignment                                                     | $\lambda$ , nm                                                 | $f$   | State           | Assignment                                                     | $\lambda$ , nm | $f$   |
|-------------------------------|-----------------|----------------------------------------------------------------|----------------------------------------------------------------|-------|-----------------|----------------------------------------------------------------|----------------|-------|
|                               | I band          |                                                                |                                                                |       | II band         |                                                                |                |       |
| <b>1D armchair BN-ribbons</b> |                 |                                                                |                                                                |       |                 |                                                                |                |       |
| 1×1                           | S <sub>2</sub>  | X <sup>1</sup> A <sub>g</sub> → 1 <sup>1</sup> B <sub>u</sub>  | 214                                                            | 0.182 | –               | –                                                              | –              | –     |
| 2×1                           | S <sub>3</sub>  | X <sup>1</sup> A <sub>g</sub> → 1 <sup>1</sup> B <sub>u</sub>  | 228                                                            | 0.051 | S <sub>9</sub>  | X <sup>1</sup> A <sub>g</sub> → 4 <sup>1</sup> B <sub>u</sub>  | 196            | 0.284 |
|                               | S <sub>4</sub>  | X <sup>1</sup> A <sub>g</sub> → 2 <sup>1</sup> B <sub>u</sub>  | 226                                                            | 0.114 | S <sub>10</sub> | X <sup>1</sup> A <sub>g</sub> → 5 <sup>1</sup> B <sub>u</sub>  | 191            | 0.149 |
| 3×1                           | S <sub>4</sub>  | X <sup>1</sup> A <sub>g</sub> → 2 <sup>1</sup> B <sub>u</sub>  | 230                                                            | 0.057 | S <sub>16</sub> | X <sup>1</sup> A <sub>g</sub> → 8 <sup>1</sup> B <sub>u</sub>  | 201            | 0.650 |
|                               | S <sub>6</sub>  | X <sup>1</sup> A <sub>g</sub> → 3 <sup>1</sup> B <sub>u</sub>  | 228                                                            | 0.134 | S <sub>18</sub> | X <sup>1</sup> A <sub>g</sub> → 9 <sup>1</sup> B <sub>u</sub>  | 197            | 0.169 |
|                               |                 | S <sub>19</sub>                                                | X <sup>1</sup> A <sub>g</sub> → 10 <sup>1</sup> B <sub>u</sub> |       |                 |                                                                | 195            | 0.299 |
| 4×1                           | S <sub>6</sub>  | X <sup>1</sup> A <sub>g</sub> → 3 <sup>1</sup> B <sub>u</sub>  | 229                                                            | 0.153 | S <sub>22</sub> | X <sup>1</sup> A <sub>g</sub> → 11 <sup>1</sup> B <sub>u</sub> | 204            | 1.424 |
|                               | S <sub>8</sub>  | X <sup>1</sup> A <sub>g</sub> → 4 <sup>1</sup> B <sub>u</sub>  | 228                                                            | 0.067 | S <sub>28</sub> | X <sup>1</sup> A <sub>g</sub> → 14 <sup>1</sup> B <sub>u</sub> | 198            | 0.271 |
|                               |                 | S <sub>30</sub>                                                | X <sup>1</sup> A <sub>g</sub> → 16 <sup>1</sup> B <sub>u</sub> |       |                 |                                                                | 196            | 0.150 |
| 5×1                           | S <sub>8</sub>  | X <sup>1</sup> A <sub>g</sub> → 4 <sup>1</sup> B <sub>u</sub>  | 230                                                            | 0.189 | S <sub>26</sub> | X <sup>1</sup> A <sub>g</sub> → 18 <sup>1</sup> B <sub>u</sub> | 207            | 0.564 |
|                               | S <sub>10</sub> | X <sup>1</sup> A <sub>g</sub> → 5 <sup>1</sup> B <sub>u</sub>  | 228                                                            | 0.074 | S <sub>28</sub> | X <sup>1</sup> A <sub>g</sub> → 19 <sup>1</sup> B <sub>u</sub> | 206            | 1.376 |
|                               |                 | S <sub>29</sub>                                                | X <sup>1</sup> A <sub>g</sub> → 20 <sup>1</sup> B <sub>u</sub> |       |                 |                                                                | 205            | 0.119 |
| 6×1                           | S <sub>10</sub> | X <sup>1</sup> A <sub>g</sub> → 5 <sup>1</sup> B <sub>u</sub>  | 230                                                            | 0.249 | S <sub>32</sub> | X <sup>1</sup> A <sub>g</sub> → 16 <sup>1</sup> B <sub>u</sub> | 208            | 1.872 |
|                               | S <sub>12</sub> | X <sup>1</sup> A <sub>g</sub> → 6 <sup>1</sup> B <sub>u</sub>  | 228                                                            | 0.052 | S <sub>34</sub> | X <sup>1</sup> A <sub>g</sub> → 17 <sup>1</sup> B <sub>u</sub> | 207            | 0.391 |
|                               |                 | S <sub>35</sub>                                                | X <sup>1</sup> A <sub>g</sub> → 18 <sup>1</sup> B <sub>u</sub> |       |                 |                                                                | 206            | 0.395 |
| 7×1                           | S <sub>12</sub> | X <sup>1</sup> A <sub>g</sub> → 6 <sup>1</sup> B <sub>u</sub>  | 230                                                            | 0.297 | S <sub>37</sub> | X <sup>1</sup> A <sub>g</sub> → 18 <sup>1</sup> B <sub>u</sub> | 210            | 0.180 |
|                               | S <sub>14</sub> | X <sup>1</sup> A <sub>g</sub> → 7 <sup>1</sup> B <sub>u</sub>  | 228                                                            | 0.049 | S <sub>38</sub> | X <sup>1</sup> A <sub>g</sub> → 19 <sup>1</sup> B <sub>u</sub> | 209            | 1.633 |
|                               |                 | S <sub>39</sub>                                                | X <sup>1</sup> A <sub>g</sub> → 20 <sup>1</sup> B <sub>u</sub> |       |                 |                                                                | 209            | 0.680 |
| 8×1                           | S <sub>14</sub> | X <sup>1</sup> A <sub>g</sub> → 7 <sup>1</sup> B <sub>u</sub>  | 230                                                            | 0.349 | S <sub>43</sub> | X <sup>1</sup> A <sub>g</sub> → 21 <sup>1</sup> B <sub>u</sub> | 210            | 2.127 |
|                               | S <sub>16</sub> | X <sup>1</sup> A <sub>g</sub> → 8 <sup>1</sup> B <sub>u</sub>  | 228                                                            | 0.042 | S <sub>44</sub> | X <sup>1</sup> A <sub>g</sub> → 22 <sup>1</sup> B <sub>u</sub> | 209            | 0.335 |
| 9×1                           | S <sub>16</sub> | X <sup>1</sup> A <sub>g</sub> → 8 <sup>1</sup> B <sub>u</sub>  | 230                                                            | 0.400 | S <sub>49</sub> | X <sup>1</sup> A <sub>g</sub> → 25 <sup>1</sup> B <sub>u</sub> | 211            | 2.347 |
|                               |                 |                                                                |                                                                |       | S <sub>51</sub> | X <sup>1</sup> A <sub>g</sub> → 26 <sup>1</sup> B <sub>u</sub> | 210            | 1.004 |
| 10×1                          | S <sub>18</sub> | X <sup>1</sup> A <sub>g</sub> → 9 <sup>1</sup> B <sub>2u</sub> | 230                                                            | 0.449 | S <sub>55</sub> | X <sup>1</sup> A <sub>g</sub> → 27 <sup>1</sup> B <sub>u</sub> | 211            | 0.366 |
|                               |                 |                                                                |                                                                |       | S <sub>56</sub> | X <sup>1</sup> A <sub>g</sub> → 28 <sup>1</sup> B <sub>u</sub> | 211            | 3.008 |
|                               |                 |                                                                |                                                                |       | S <sub>57</sub> | X <sup>1</sup> A <sub>g</sub> → 29 <sup>1</sup> B <sub>u</sub> | 210            | 0.468 |
| <b>1D zigzag BN-ribbons</b>   |                 |                                                                |                                                                |       |                 |                                                                |                |       |
| 2×2                           | S <sub>2</sub>  | X <sup>1</sup> A <sub>g</sub> → 1 <sup>1</sup> B <sub>u</sub>  | 254                                                            | 0.658 | S <sub>6</sub>  | X <sup>1</sup> A <sub>g</sub> → 3 <sup>1</sup> B <sub>u</sub>  | 235            | 0.119 |
|                               |                 |                                                                |                                                                |       | S <sub>12</sub> | X <sup>1</sup> A <sub>g</sub> → 6 <sup>1</sup> B <sub>u</sub>  | 220            | 0.192 |
|                               |                 |                                                                |                                                                |       | S <sub>24</sub> | X <sup>1</sup> A <sub>g</sub> → 12 <sup>1</sup> B <sub>u</sub> | 202            | 0.581 |
| 2×3                           | S <sub>2</sub>  | X <sup>1</sup> A <sub>g</sub> → 1 <sup>1</sup> B <sub>u</sub>  | 264                                                            | 1.357 | S <sub>14</sub> | X <sup>1</sup> A <sub>g</sub> → 7 <sup>1</sup> B <sub>u</sub>  | 231            | 0.451 |
|                               |                 |                                                                |                                                                |       | S <sub>26</sub> | X <sup>1</sup> A <sub>g</sub> → 13 <sup>1</sup> B <sub>u</sub> | 217            | 0.734 |
| 2×4                           | S <sub>2</sub>  | X <sup>1</sup> A <sub>g</sub> → 1 <sup>1</sup> B <sub>u</sub>  | 268                                                            | 2.140 | S <sub>7</sub>  | X <sup>1</sup> A <sub>g</sub> → 4 <sup>1</sup> B <sub>u</sub>  | 245            | 0.036 |
|                               |                 |                                                                |                                                                |       | S <sub>14</sub> | X <sup>1</sup> A <sub>g</sub> → 7 <sup>1</sup> B <sub>u</sub>  | 237            | 0.314 |
|                               |                 |                                                                |                                                                |       | S <sub>29</sub> | X <sup>1</sup> A <sub>g</sub> → 15 <sup>1</sup> B <sub>u</sub> | 225            | 0.579 |
| 2×5                           | S <sub>1</sub>  | X <sup>1</sup> A <sub>g</sub> → 1 <sup>1</sup> B <sub>1u</sub> | 270                                                            | 3.015 | S <sub>7</sub>  | X <sup>1</sup> A <sub>g</sub> → 4 <sup>1</sup> B <sub>u</sub>  | 252            | 0.159 |
|                               |                 |                                                                |                                                                |       | S <sub>29</sub> | X <sup>1</sup> A <sub>g</sub> → 15 <sup>1</sup> B <sub>u</sub> | 231            | 0.516 |
| <b>2D BN-sheet</b>            |                 |                                                                |                                                                |       |                 |                                                                |                |       |
| 3×1.5                         | S <sub>1</sub>  | X <sup>1</sup> A <sub>1</sub> → 1 <sup>1</sup> B <sub>2</sub>  | 257                                                            | 0.003 |                 |                                                                |                |       |
|                               | S <sub>2</sub>  | X <sup>1</sup> A <sub>1</sub> → 2 <sup>1</sup> B <sub>2</sub>  | 254                                                            | 0.071 |                 |                                                                |                |       |
|                               | S <sub>3</sub>  | X <sup>1</sup> A <sub>1</sub> → 3 <sup>1</sup> B <sub>2</sub>  | 244                                                            | 0.318 |                 |                                                                |                |       |
|                               | S <sub>6</sub>  | X <sup>1</sup> A <sub>1</sub> → 3 <sup>1</sup> A <sub>1</sub>  | 238                                                            | 0.006 |                 |                                                                |                |       |
| 3×2                           | S <sub>1</sub>  | X <sup>1</sup> A <sub>g</sub> → 1 <sup>1</sup> B <sub>u</sub>  | 262                                                            | 0.022 | S <sub>9</sub>  | X <sup>1</sup> A <sub>g</sub> → 5 <sup>1</sup> B <sub>u</sub>  | 235            | 0.190 |
|                               | S <sub>3</sub>  | X <sup>1</sup> A <sub>g</sub> → 2 <sup>1</sup> B <sub>u</sub>  | 256                                                            | 0.707 | S <sub>12</sub> | X <sup>1</sup> A <sub>g</sub> → 6 <sup>1</sup> B <sub>u</sub>  | 232            | 0.055 |
| 3×3                           | S <sub>1</sub>  | X <sup>1</sup> A <sub>g</sub> → 1 <sup>1</sup> B <sub>u</sub>  | 268                                                            | 0.342 | S <sub>14</sub> | X <sup>1</sup> A <sub>g</sub> → 7 <sup>1</sup> B <sub>u</sub>  | 239            | 0.153 |

|     |                |                                                   |     |       |                 |                                                    |     |       |
|-----|----------------|---------------------------------------------------|-----|-------|-----------------|----------------------------------------------------|-----|-------|
|     | S <sub>3</sub> | X <sup>1</sup> Ag → 2 <sup>1</sup> B <sub>u</sub> | 264 | 1.152 | S <sub>17</sub> | X <sup>1</sup> Ag → 8 <sup>1</sup> B <sub>u</sub>  | 237 | 0.198 |
|     | S <sub>5</sub> | X <sup>1</sup> Ag → 3 <sup>1</sup> B <sub>u</sub> | 255 | 0.040 | S <sub>18</sub> | X <sup>1</sup> Ag → 9 <sup>1</sup> B <sub>u</sub>  | 236 | 0.258 |
|     |                |                                                   |     |       | S <sub>19</sub> | X <sup>1</sup> Ag → 10 <sup>1</sup> B <sub>u</sub> | 235 | 0.122 |
|     |                |                                                   |     |       | S <sub>21</sub> | X <sup>1</sup> Ag → 11 <sup>1</sup> B <sub>u</sub> | 234 | 0.162 |
| 4×2 | S <sub>2</sub> | X <sup>1</sup> Ag → 1 <sup>1</sup> B <sub>u</sub> | 262 | 0.019 | S <sub>9</sub>  | X <sup>1</sup> Ag → 6 <sup>1</sup> B <sub>u</sub>  | 238 | 0.095 |
|     | S <sub>4</sub> | X <sup>1</sup> Ag → 2 <sup>1</sup> B <sub>u</sub> | 256 | 0.844 | S <sub>11</sub> | X <sup>1</sup> Ag → 7 <sup>1</sup> B <sub>u</sub>  | 237 | 0.061 |
|     |                |                                                   |     |       | S <sub>14</sub> | X <sup>1</sup> Ag → 8 <sup>1</sup> B <sub>u</sub>  | 236 | 0.207 |

**Table S4.** The optimized Cartesian coordinates of the biphenylene sheet **1** ( $n \times m = 3 \times 1.5$ ) calculated at the B3LYP/6–31G(d) level of theory

| Center<br>Number | Atomic<br>Number | Coordinates (Angstroms) |           |           |
|------------------|------------------|-------------------------|-----------|-----------|
|                  |                  | X                       | Y         | Z         |
| 1                | 6                | 0.000000                | 0.000000  | 2.957375  |
| 2                | 6                | 0.000000                | 0.000000  | 1.495698  |
| 3                | 6                | 0.000000                | 1.154511  | 0.705612  |
| 4                | 6                | 0.000000                | 1.154511  | -0.705612 |
| 5                | 6                | 0.000000                | 1.154901  | 3.745164  |
| 6                | 6                | 0.000000                | 0.000000  | 5.941085  |
| 7                | 6                | 0.000000                | 1.156990  | 5.160876  |
| 8                | 6                | 0.000000                | 0.000000  | -1.495698 |
| 9                | 6                | 0.000000                | 3.811360  | 1.480454  |
| 10               | 6                | 0.000000                | 2.664160  | 0.710063  |
| 11               | 6                | 0.000000                | 3.811360  | -1.480454 |
| 12               | 6                | 0.000000                | 5.007522  | -0.691809 |
| 13               | 6                | 0.000000                | 5.007522  | 0.691809  |
| 14               | 6                | 0.000000                | 3.812775  | 2.960402  |
| 15               | 6                | 0.000000                | 5.019094  | 3.736327  |
| 16               | 6                | 0.000000                | 2.663094  | 3.729414  |
| 17               | 6                | 0.000000                | 5.025271  | 5.121491  |
| 18               | 6                | 0.000000                | 2.668131  | 5.152183  |
| 19               | 6                | 0.000000                | 3.825264  | 5.885851  |
| 20               | 6                | 0.000000                | 2.664160  | -0.710063 |
| 21               | 1                | 0.000000                | 0.000000  | 7.026291  |
| 22               | 1                | 0.000000                | 5.971464  | -1.189360 |
| 23               | 1                | 0.000000                | 5.971464  | 1.189360  |
| 24               | 1                | 0.000000                | 5.976627  | 3.226692  |
| 25               | 1                | 0.000000                | 5.980206  | 5.640075  |
| 26               | 1                | 0.000000                | 3.851758  | 6.971204  |
| 27               | 6                | 0.000000                | -3.811360 | 1.480454  |
| 28               | 6                | 0.000000                | -5.007522 | 0.691809  |
| 29               | 6                | 0.000000                | -3.811360 | -1.480454 |
| 30               | 6                | 0.000000                | -2.664160 | -0.710063 |
| 31               | 6                | 0.000000                | -2.664160 | 0.710063  |
| 32               | 6                | 0.000000                | -3.812775 | 2.960402  |
| 33               | 6                | 0.000000                | -1.154511 | 0.705612  |
| 34               | 6                | 0.000000                | -2.663094 | 3.729414  |
| 35               | 6                | 0.000000                | -1.154901 | 3.745164  |
| 36               | 6                | 0.000000                | -1.154511 | -0.705612 |
| 37               | 6                | 0.000000                | -5.019094 | 3.736327  |
| 38               | 6                | 0.000000                | -1.156990 | 5.160876  |
| 39               | 6                | 0.000000                | -2.668131 | 5.152183  |
| 40               | 6                | 0.000000                | -5.025271 | 5.121491  |
| 41               | 6                | 0.000000                | -3.825264 | 5.885851  |
| 42               | 6                | 0.000000                | -5.007522 | -0.691809 |
| 43               | 1                | 0.000000                | -3.851758 | 6.971204  |
| 44               | 6                | 0.000000                | 0.000000  | -5.941085 |
| 45               | 6                | 0.000000                | 1.156990  | -5.160876 |
| 46               | 6                | 0.000000                | 0.000000  | -2.957375 |
| 47               | 6                | 0.000000                | 1.154901  | -3.745164 |
| 48               | 6                | 0.000000                | 3.825264  | -5.885851 |
| 49               | 6                | 0.000000                | 5.025271  | -5.121491 |
| 50               | 6                | 0.000000                | 2.668131  | -5.152183 |
| 51               | 6                | 0.000000                | 5.019094  | -3.736327 |
| 52               | 6                | 0.000000                | 2.663094  | -3.729414 |

|    |   |          |           |           |
|----|---|----------|-----------|-----------|
| 53 | 6 | 0.000000 | 3.812775  | -2.960402 |
| 54 | 1 | 0.000000 | 5.980206  | -5.640075 |
| 55 | 1 | 0.000000 | 5.976627  | -3.226692 |
| 56 | 6 | 0.000000 | -3.825264 | -5.885851 |
| 57 | 6 | 0.000000 | -2.668131 | -5.152183 |
| 58 | 6 | 0.000000 | -1.156990 | -5.160876 |
| 59 | 6 | 0.000000 | -1.154901 | -3.745164 |
| 60 | 6 | 0.000000 | -2.663094 | -3.729414 |
| 61 | 6 | 0.000000 | -5.019094 | -3.736327 |
| 62 | 6 | 0.000000 | -3.812775 | -2.960402 |
| 63 | 6 | 0.000000 | -5.025271 | -5.121491 |
| 64 | 1 | 0.000000 | -5.971464 | 1.189360  |
| 65 | 1 | 0.000000 | -5.976627 | 3.226692  |
| 66 | 1 | 0.000000 | -5.980206 | 5.640075  |
| 67 | 1 | 0.000000 | -5.971464 | -1.189360 |
| 68 | 1 | 0.000000 | 0.000000  | -7.026291 |
| 69 | 1 | 0.000000 | 3.851758  | -6.971204 |
| 70 | 1 | 0.000000 | -3.851758 | -6.971204 |
| 71 | 1 | 0.000000 | -5.976627 | -3.226692 |
| 72 | 1 | 0.000000 | -5.980206 | -5.640075 |

**Table S5.** The optimized Cartesian coordinates of the biphenylene sheet 2 ( $n \times m = 3 \times 2$ ) calculated at the B3LYP/6-31G(d) level of theory

| Center<br>Number | Atomic<br>Number | Coordinates (Angstroms) |           |           |
|------------------|------------------|-------------------------|-----------|-----------|
|                  |                  | X                       | Y         | Z         |
| 1                | 6                | 0.000000                | 5.957199  | 1.915693  |
| 2                | 6                | 0.000000                | 5.166444  | 3.070185  |
| 3                | 6                | 0.000000                | 2.967438  | 1.899671  |
| 4                | 6                | 0.000000                | 3.753891  | 3.062266  |
| 5                | 6                | 0.000000                | 5.885307  | 5.738192  |
| 6                | 6                | 0.000000                | 5.116965  | 6.937549  |
| 7                | 6                | 0.000000                | 5.154814  | 4.580525  |
| 8                | 6                | 0.000000                | 3.733227  | 6.927344  |
| 9                | 6                | 0.000000                | 3.731190  | 4.570483  |
| 10               | 6                | 0.000000                | 2.959479  | 5.717235  |
| 11               | 1                | 0.000000                | 5.633582  | 7.893497  |
| 12               | 1                | 0.000000                | 3.220239  | 7.882977  |
| 13               | 6                | 0.000000                | -2.967438 | 1.899671  |
| 14               | 6                | 0.000000                | -1.503027 | 1.900389  |
| 15               | 6                | 0.000000                | -0.704844 | 3.057561  |
| 16               | 6                | 0.000000                | 0.704844  | 3.057561  |
| 17               | 6                | 0.000000                | -3.753891 | 3.062266  |
| 18               | 6                | 0.000000                | -5.957199 | 1.915693  |
| 19               | 6                | 0.000000                | -5.166444 | 3.070185  |
| 20               | 6                | 0.000000                | 1.503027  | 1.900389  |
| 21               | 6                | 0.000000                | -1.480344 | 5.713409  |
| 22               | 6                | 0.000000                | -0.710520 | 4.567082  |
| 23               | 6                | 0.000000                | 1.480344  | 5.713409  |
| 24               | 6                | 0.000000                | 0.690863  | 6.911438  |
| 25               | 6                | 0.000000                | -0.690863 | 6.911438  |
| 26               | 6                | 0.000000                | -2.959479 | 5.717235  |
| 27               | 6                | 0.000000                | -3.733227 | 6.927344  |
| 28               | 6                | 0.000000                | -3.731190 | 4.570483  |
| 29               | 6                | 0.000000                | -5.116965 | 6.937549  |
| 30               | 6                | 0.000000                | -5.154814 | 4.580525  |
| 31               | 6                | 0.000000                | -5.885307 | 5.738192  |
| 32               | 6                | 0.000000                | 0.710520  | 4.567082  |
| 33               | 1                | 0.000000                | -7.042266 | 1.924716  |
| 34               | 1                | 0.000000                | 1.189364  | 7.874786  |
| 35               | 1                | 0.000000                | -1.189364 | 7.874786  |
| 36               | 1                | 0.000000                | -3.220239 | 7.882977  |
| 37               | 1                | 0.000000                | -5.633582 | 7.893497  |
| 38               | 1                | 0.000000                | -6.970494 | 5.767862  |
| 39               | 6                | 0.000000                | 5.957199  | -1.915693 |
| 40               | 6                | 0.000000                | 5.186106  | -0.757111 |
| 41               | 6                | 0.000000                | 5.186106  | 0.757111  |
| 42               | 6                | 0.000000                | 3.766779  | 0.752590  |
| 43               | 6                | 0.000000                | 3.766779  | -0.752590 |
| 44               | 6                | 0.000000                | 3.753891  | -3.062266 |

|    |   |          |           |           |
|----|---|----------|-----------|-----------|
| 45 | 6 | 0.000000 | 2.967438  | -1.899671 |
| 46 | 6 | 0.000000 | -1.503027 | -1.900389 |
| 47 | 6 | 0.000000 | -0.704844 | -3.057561 |
| 48 | 6 | 0.000000 | 1.503027  | -1.900389 |
| 49 | 6 | 0.000000 | 0.708011  | -0.752792 |
| 50 | 6 | 0.000000 | -0.708011 | -0.752792 |
| 51 | 6 | 0.000000 | -2.967438 | -1.899671 |
| 52 | 6 | 0.000000 | -0.708011 | 0.752792  |
| 53 | 6 | 0.000000 | -3.766779 | -0.752590 |
| 54 | 6 | 0.000000 | -3.766779 | 0.752590  |
| 55 | 6 | 0.000000 | 0.708011  | 0.752792  |
| 56 | 6 | 0.000000 | -3.753891 | -3.062266 |
| 57 | 6 | 0.000000 | -5.186106 | 0.757111  |
| 58 | 6 | 0.000000 | -5.186106 | -0.757111 |
| 59 | 6 | 0.000000 | -5.166444 | -3.070185 |
| 60 | 6 | 0.000000 | -5.957199 | -1.915693 |
| 61 | 6 | 0.000000 | 0.704844  | -3.057561 |
| 62 | 1 | 0.000000 | -7.042266 | -1.924716 |
| 63 | 6 | 0.000000 | 5.166444  | -3.070185 |
| 64 | 6 | 0.000000 | 5.885307  | -5.738192 |
| 65 | 6 | 0.000000 | 5.154814  | -4.580525 |
| 66 | 6 | 0.000000 | 5.116965  | -6.937549 |
| 67 | 6 | 0.000000 | 3.731190  | -4.570483 |
| 68 | 6 | 0.000000 | 3.733227  | -6.927344 |
| 69 | 6 | 0.000000 | 2.959479  | -5.717235 |
| 70 | 1 | 0.000000 | 3.220239  | -7.882977 |
| 71 | 1 | 0.000000 | 5.633582  | -7.893497 |
| 72 | 6 | 0.000000 | -1.480344 | -5.713409 |
| 73 | 6 | 0.000000 | -0.690863 | -6.911438 |
| 74 | 6 | 0.000000 | 1.480344  | -5.713409 |
| 75 | 6 | 0.000000 | 0.710520  | -4.567082 |
| 76 | 6 | 0.000000 | -0.710520 | -4.567082 |
| 77 | 6 | 0.000000 | -2.959479 | -5.717235 |
| 78 | 6 | 0.000000 | -3.731190 | -4.570483 |
| 79 | 6 | 0.000000 | -3.733227 | -6.927344 |
| 80 | 6 | 0.000000 | -5.154814 | -4.580525 |
| 81 | 6 | 0.000000 | -5.116965 | -6.937549 |
| 82 | 6 | 0.000000 | -5.885307 | -5.738192 |
| 83 | 1 | 0.000000 | -5.633582 | -7.893497 |
| 84 | 1 | 0.000000 | -1.189364 | -7.874786 |
| 85 | 1 | 0.000000 | -3.220239 | -7.882977 |
| 86 | 6 | 0.000000 | 0.690863  | -6.911438 |
| 87 | 1 | 0.000000 | 1.189364  | -7.874786 |
| 88 | 1 | 0.000000 | -6.970494 | -5.767862 |
| 89 | 1 | 0.000000 | 7.042266  | 1.924716  |
| 90 | 1 | 0.000000 | 6.970494  | 5.767862  |
| 91 | 1 | 0.000000 | 7.042266  | -1.924716 |
| 92 | 1 | 0.000000 | 6.970494  | -5.767862 |

**Table S6.** The optimized Cartesian coordinates of the biphenylene sheet **3** ( $n \times m = 3 \times 3$ ) calculated at the B3LYP/6-31G(d) level of theory

| Center Number | Atomic Number | Coordinates (Angstroms) |           |           |
|---------------|---------------|-------------------------|-----------|-----------|
|               |               | X                       | Y         | Z         |
| 1             | 6             | 0.000000                | 1.479762  | 9.525605  |
| 2             | 6             | 0.000000                | 0.710557  | 8.378337  |
| 3             | 6             | 0.000000                | -1.479762 | 9.525605  |
| 4             | 6             | 0.000000                | -0.690569 | 10.723596 |
| 5             | 6             | 0.000000                | 0.690569  | 10.723596 |
| 6             | 6             | 0.000000                | 2.957376  | 9.531704  |
| 7             | 6             | 0.000000                | 3.730663  | 10.742369 |
| 8             | 6             | 0.000000                | 3.729332  | 8.385367  |
| 9             | 6             | 0.000000                | 5.114310  | 10.753410 |
| 10            | 6             | 0.000000                | 5.152696  | 8.396674  |
| 11            | 6             | 0.000000                | 5.883093  | 9.554356  |
| 12            | 6             | 0.000000                | -0.710557 | 8.378337  |
| 13            | 1             | 0.000000                | 6.968336  | 9.583567  |
| 14            | 6             | 0.000000                | 1.503025  | 5.709392  |
| 15            | 6             | 0.000000                | 0.708472  | 4.562391  |
| 16            | 6             | 0.000000                | -1.503025 | 5.709392  |



|    |   |          |           |            |
|----|---|----------|-----------|------------|
| 17 | 6 | 0.000000 | -0.704206 | 6.867990   |
| 18 | 6 | 0.000000 | 0.704206  | 6.867990   |
| 19 | 6 | 0.000000 | 2.965805  | 5.712139   |
| 20 | 6 | 0.000000 | 3.752302  | 6.877093   |
| 21 | 6 | 0.000000 | 3.766763  | 4.568046   |
| 22 | 6 | 0.000000 | 5.164138  | 6.886849   |
| 23 | 6 | 0.000000 | 5.186738  | 4.576484   |
| 24 | 6 | 0.000000 | 5.957137  | 5.733202   |
| 25 | 6 | 0.000000 | -0.708472 | 4.562391   |
| 26 | 1 | 0.000000 | 7.042112  | 5.743133   |
| 27 | 6 | 0.000000 | -5.883093 | 9.554356   |
| 28 | 6 | 0.000000 | -5.114310 | 10.753410  |
| 29 | 6 | 0.000000 | -3.730663 | 10.742369  |
| 30 | 6 | 0.000000 | -3.729332 | 8.385367   |
| 31 | 6 | 0.000000 | -2.957376 | 9.531704   |
| 32 | 6 | 0.000000 | -5.152696 | 8.396674   |
| 33 | 6 | 0.000000 | -5.957137 | 5.733202   |
| 34 | 6 | 0.000000 | -5.164138 | 6.886849   |
| 35 | 6 | 0.000000 | -5.186738 | 4.576484   |
| 36 | 6 | 0.000000 | -3.752302 | 6.877093   |
| 37 | 6 | 0.000000 | -3.766763 | 4.568046   |
| 38 | 6 | 0.000000 | -2.965805 | 5.712139   |
| 39 | 6 | 0.000000 | 2.975842  | -1.905668  |
| 40 | 6 | 0.000000 | 1.509680  | -1.903791  |
| 41 | 6 | 0.000000 | 0.707732  | -0.753968  |
| 42 | 6 | 0.000000 | -0.707732 | -0.753968  |
| 43 | 6 | 0.000000 | 3.775189  | -0.753612  |
| 44 | 6 | 0.000000 | 5.973116  | -1.909990  |
| 45 | 6 | 0.000000 | 5.192247  | -0.755678  |
| 46 | 6 | 0.000000 | -1.509680 | -1.903791  |
| 47 | 6 | 0.000000 | 1.509680  | 1.903791   |
| 48 | 6 | 0.000000 | 0.707732  | 0.753968   |
| 49 | 6 | 0.000000 | -1.509680 | 1.903791   |
| 50 | 6 | 0.000000 | -0.706714 | 3.055356   |
| 51 | 6 | 0.000000 | 0.706714  | 3.055356   |
| 52 | 6 | 0.000000 | 2.975842  | 1.905668   |
| 53 | 6 | 0.000000 | 3.773427  | 3.061843   |
| 54 | 6 | 0.000000 | 3.775189  | 0.753612   |
| 55 | 6 | 0.000000 | 5.188925  | 3.064556   |
| 56 | 6 | 0.000000 | 5.192247  | 0.755678   |
| 57 | 6 | 0.000000 | 5.973116  | 1.909990   |
| 58 | 6 | 0.000000 | -0.707732 | 0.753968   |
| 59 | 1 | 0.000000 | 7.058058  | -1.911154  |
| 60 | 1 | 0.000000 | 7.058058  | 1.911154   |
| 61 | 6 | 0.000000 | 1.503025  | -5.709392  |
| 62 | 6 | 0.000000 | 0.704206  | -6.867990  |
| 63 | 6 | 0.000000 | -1.503025 | -5.709392  |
| 64 | 6 | 0.000000 | -0.708472 | -4.562391  |
| 65 | 6 | 0.000000 | 0.708472  | -4.562391  |
| 66 | 6 | 0.000000 | 2.965805  | -5.712139  |
| 67 | 6 | 0.000000 | 0.706714  | -3.055356  |
| 68 | 6 | 0.000000 | 3.766763  | -4.568046  |
| 69 | 6 | 0.000000 | 3.773427  | -3.061843  |
| 70 | 6 | 0.000000 | -0.706714 | -3.055356  |
| 71 | 6 | 0.000000 | 3.752302  | -6.877093  |
| 72 | 6 | 0.000000 | 5.188925  | -3.064556  |
| 73 | 6 | 0.000000 | 5.186738  | -4.576484  |
| 74 | 6 | 0.000000 | 5.164138  | -6.886849  |
| 75 | 6 | 0.000000 | 5.957137  | -5.733202  |
| 76 | 6 | 0.000000 | -0.704206 | -6.867990  |
| 77 | 1 | 0.000000 | 7.042112  | -5.743133  |
| 78 | 6 | 0.000000 | 1.479762  | -9.525605  |
| 79 | 6 | 0.000000 | 0.690569  | -10.723596 |
| 80 | 6 | 0.000000 | -1.479762 | -9.525605  |
| 81 | 6 | 0.000000 | -0.710557 | -8.378337  |
| 82 | 6 | 0.000000 | 0.710557  | -8.378337  |
| 83 | 6 | 0.000000 | 2.957376  | -9.531704  |
| 84 | 6 | 0.000000 | 3.729332  | -8.385367  |
| 85 | 6 | 0.000000 | 3.730663  | -10.742369 |
| 86 | 6 | 0.000000 | 5.152696  | -8.396674  |
| 87 | 6 | 0.000000 | 5.114310  | -10.753410 |
| 88 | 6 | 0.000000 | 5.883093  | -9.554356  |
| 89 | 1 | 0.000000 | 5.630040  | -11.709912 |
| 90 | 1 | 0.000000 | 1.189172  | -11.686850 |
| 91 | 1 | 0.000000 | 3.217453  | -11.697836 |
| 92 | 6 | 0.000000 | -0.690569 | -10.723596 |
| 93 | 1 | 0.000000 | -1.189172 | -11.686850 |
| 94 | 1 | 0.000000 | 6.968336  | -9.583567  |
| 95 | 6 | 0.000000 | -5.973116 | -1.909990  |

|     |   |          |           |            |
|-----|---|----------|-----------|------------|
| 96  | 6 | 0.000000 | -5.192247 | -0.755678  |
| 97  | 6 | 0.000000 | -2.975842 | -1.905668  |
| 98  | 6 | 0.000000 | -3.775189 | -0.753612  |
| 99  | 6 | 0.000000 | -5.973116 | 1.909990   |
| 100 | 6 | 0.000000 | -5.188925 | 3.064556   |
| 101 | 6 | 0.000000 | -5.192247 | 0.755678   |
| 102 | 6 | 0.000000 | -3.773427 | 3.061843   |
| 103 | 6 | 0.000000 | -3.775189 | 0.753612   |
| 104 | 6 | 0.000000 | -2.975842 | 1.905668   |
| 105 | 6 | 0.000000 | -5.957137 | -5.733202  |
| 106 | 6 | 0.000000 | -5.186738 | -4.576484  |
| 107 | 6 | 0.000000 | -5.188925 | -3.064556  |
| 108 | 6 | 0.000000 | -3.773427 | -3.061843  |
| 109 | 6 | 0.000000 | -3.766763 | -4.568046  |
| 110 | 6 | 0.000000 | -3.752302 | -6.877093  |
| 111 | 6 | 0.000000 | -2.965805 | -5.712139  |
| 112 | 6 | 0.000000 | -5.164138 | -6.886849  |
| 113 | 6 | 0.000000 | -5.883093 | -9.554356  |
| 114 | 6 | 0.000000 | -5.152696 | -8.396674  |
| 115 | 6 | 0.000000 | -5.114310 | -10.753410 |
| 116 | 6 | 0.000000 | -3.729332 | -8.385367  |
| 117 | 6 | 0.000000 | -3.730663 | -10.742369 |
| 118 | 6 | 0.000000 | -2.957376 | -9.531704  |
| 119 | 1 | 0.000000 | -3.217453 | -11.697836 |
| 120 | 1 | 0.000000 | -5.630040 | -11.709912 |
| 121 | 1 | 0.000000 | -1.189172 | 11.686850  |
| 122 | 1 | 0.000000 | 1.189172  | 11.686850  |
| 123 | 1 | 0.000000 | 3.217453  | 11.697836  |
| 124 | 1 | 0.000000 | 5.630040  | 11.709912  |
| 125 | 1 | 0.000000 | -5.630040 | 11.709912  |
| 126 | 1 | 0.000000 | -3.217453 | 11.697836  |
| 127 | 1 | 0.000000 | -6.968336 | 9.583567   |
| 128 | 1 | 0.000000 | -7.042112 | 5.743133   |
| 129 | 1 | 0.000000 | -7.058058 | -1.911154  |
| 130 | 1 | 0.000000 | -7.058058 | 1.911154   |
| 131 | 1 | 0.000000 | -7.042112 | -5.743133  |
| 132 | 1 | 0.000000 | -6.968336 | -9.583567  |

**Table S7.** The optimized Cartesian coordinates of the biphenylene sheet 4 ( $n \times m = 4 \times 2$ ) calculated at the B3LYP/6-31G(d) level of theory

| Center Number | Atomic Number | Coordinates (Angstroms) |           |          |
|---------------|---------------|-------------------------|-----------|----------|
|               |               | X                       | Y         | Z        |
| 1             | 6             | 0.000000                | 1.900275  | 5.196607 |
| 2             | 6             | 0.000000                | 1.902041  | 3.733206 |
| 3             | 6             | 0.000000                | 3.059378  | 2.935322 |
| 4             | 6             | 0.000000                | 3.057685  | 1.526060 |
| 5             | 6             | 0.000000                | 3.063305  | 5.980921 |
| 6             | 6             | 0.000000                | 1.918022  | 8.184391 |
| 7             | 6             | 0.000000                | 3.072564  | 7.393443 |
| 8             | 6             | 0.000000                | 1.901222  | 0.730434 |
| 9             | 6             | 0.000000                | 5.717361  | 3.703309 |
| 10            | 6             | 0.000000                | 4.569715  | 2.935436 |
| 11            | 6             | 0.000000                | 5.710565  | 0.739412 |
| 12            | 6             | 0.000000                | 6.909793  | 1.527093 |
| 13            | 6             | 0.000000                | 6.912800  | 2.909941 |
| 14            | 6             | 0.000000                | 5.719959  | 5.182896 |
| 15            | 6             | 0.000000                | 6.929567  | 5.955827 |
| 16            | 6             | 0.000000                | 4.572483  | 5.955616 |
| 17            | 6             | 0.000000                | 6.940690  | 7.340129 |
| 18            | 6             | 0.000000                | 4.583635  | 7.378970 |
| 19            | 6             | 0.000000                | 5.742475  | 8.108709 |
| 20            | 6             | 0.000000                | 4.566319  | 1.514574 |
| 21            | 1             | 0.000000                | 1.927778  | 9.269482 |
| 22            | 1             | 0.000000                | 7.872182  | 1.026399 |
| 23            | 1             | 0.000000                | 7.877782  | 3.405344 |
| 24            | 1             | 0.000000                | 7.885034  | 5.442472 |
| 25            | 1             | 0.000000                | 7.897268  | 7.855566 |
| 26            | 1             | 0.000000                | 5.772092  | 9.193942 |
| 27            | 6             | 0.000000                | -1.902041 | 3.733206 |
| 28            | 6             | 0.000000                | -3.059378 | 2.935322 |

|     |   |          |           |           |
|-----|---|----------|-----------|-----------|
| 29  | 6 | 0.000000 | -1.901222 | 0.730434  |
| 30  | 6 | 0.000000 | -0.752809 | 1.524425  |
| 31  | 6 | 0.000000 | -0.753431 | 2.939542  |
| 32  | 6 | 0.000000 | -1.900275 | 5.196607  |
| 33  | 6 | 0.000000 | 0.753431  | 2.939542  |
| 34  | 6 | 0.000000 | -0.752861 | 5.995724  |
| 35  | 6 | 0.000000 | 0.752861  | 5.995724  |
| 36  | 6 | 0.000000 | 0.752809  | 1.524425  |
| 37  | 6 | 0.000000 | -3.063305 | 5.980921  |
| 38  | 6 | 0.000000 | 0.757890  | 7.414696  |
| 39  | 6 | 0.000000 | -0.757890 | 7.414696  |
| 40  | 6 | 0.000000 | -3.072564 | 7.393443  |
| 41  | 6 | 0.000000 | -1.918022 | 8.184391  |
| 42  | 6 | 0.000000 | -3.057685 | 1.526060  |
| 43  | 1 | 0.000000 | -1.927778 | 9.269482  |
| 44  | 6 | 0.000000 | -5.717361 | 3.703309  |
| 45  | 6 | 0.000000 | -6.912800 | 2.909941  |
| 46  | 6 | 0.000000 | -5.710565 | 0.739412  |
| 47  | 6 | 0.000000 | -4.566319 | 1.514574  |
| 48  | 6 | 0.000000 | -4.569715 | 2.935436  |
| 49  | 6 | 0.000000 | -5.719959 | 5.182896  |
| 50  | 6 | 0.000000 | -4.572483 | 5.955616  |
| 51  | 6 | 0.000000 | -6.929567 | 5.955827  |
| 52  | 6 | 0.000000 | -4.583635 | 7.378970  |
| 53  | 6 | 0.000000 | -6.940690 | 7.340129  |
| 54  | 6 | 0.000000 | -5.742475 | 8.108709  |
| 55  | 1 | 0.000000 | -7.897268 | 7.855566  |
| 56  | 1 | 0.000000 | -7.877782 | 3.405344  |
| 57  | 1 | 0.000000 | -7.885034 | 5.442472  |
| 58  | 6 | 0.000000 | -6.909793 | 1.527093  |
| 59  | 1 | 0.000000 | -7.872182 | 1.026399  |
| 60  | 1 | 0.000000 | -5.772092 | 9.193942  |
| 61  | 6 | 0.000000 | 1.902041  | -3.733206 |
| 62  | 6 | 0.000000 | 3.059378  | -2.935322 |
| 63  | 6 | 0.000000 | 1.901222  | -0.730434 |
| 64  | 6 | 0.000000 | 3.057685  | -1.526060 |
| 65  | 6 | 0.000000 | 5.717361  | -3.703309 |
| 66  | 6 | 0.000000 | 6.912800  | -2.909941 |
| 67  | 6 | 0.000000 | 4.569715  | -2.935436 |
| 68  | 6 | 0.000000 | 6.909793  | -1.527093 |
| 69  | 6 | 0.000000 | 4.566319  | -1.514574 |
| 70  | 6 | 0.000000 | 5.710565  | -0.739412 |
| 71  | 1 | 0.000000 | 7.877782  | -3.405344 |
| 72  | 1 | 0.000000 | 7.872182  | -1.026399 |
| 73  | 6 | 0.000000 | -1.902041 | -3.733206 |
| 74  | 6 | 0.000000 | -0.753431 | -2.939542 |
| 75  | 6 | 0.000000 | 0.753431  | -2.939542 |
| 76  | 6 | 0.000000 | 0.752809  | -1.524425 |
| 77  | 6 | 0.000000 | -0.752809 | -1.524425 |
| 78  | 6 | 0.000000 | -3.057685 | -1.526060 |
| 79  | 6 | 0.000000 | -1.901222 | -0.730434 |
| 80  | 6 | 0.000000 | -3.059378 | -2.935322 |
| 81  | 6 | 0.000000 | -5.717361 | -3.703309 |
| 82  | 6 | 0.000000 | -4.569715 | -2.935436 |
| 83  | 6 | 0.000000 | -6.912800 | -2.909941 |
| 84  | 6 | 0.000000 | -4.566319 | -1.514574 |
| 85  | 6 | 0.000000 | -6.909793 | -1.527093 |
| 86  | 6 | 0.000000 | -5.710565 | -0.739412 |
| 87  | 1 | 0.000000 | -7.872182 | -1.026399 |
| 88  | 1 | 0.000000 | -7.877782 | -3.405344 |
| 89  | 6 | 0.000000 | 1.918022  | -8.184391 |
| 90  | 6 | 0.000000 | 3.072564  | -7.393443 |
| 91  | 6 | 0.000000 | 1.900275  | -5.196607 |
| 92  | 6 | 0.000000 | 3.063305  | -5.980921 |
| 93  | 6 | 0.000000 | 5.742475  | -8.108709 |
| 94  | 6 | 0.000000 | 6.940690  | -7.340129 |
| 95  | 6 | 0.000000 | 4.583635  | -7.378970 |
| 96  | 6 | 0.000000 | 6.929567  | -5.955827 |
| 97  | 6 | 0.000000 | 4.572483  | -5.955616 |
| 98  | 1 | 0.000000 | 7.897268  | -7.855566 |
| 99  | 1 | 0.000000 | 7.885034  | -5.442472 |
| 100 | 6 | 0.000000 | -1.918022 | -8.184391 |
| 101 | 6 | 0.000000 | -0.757890 | -7.414696 |
| 102 | 6 | 0.000000 | 0.757890  | -7.414696 |
| 103 | 6 | 0.000000 | 0.752861  | -5.995724 |
| 104 | 6 | 0.000000 | -0.752861 | -5.995724 |
| 105 | 6 | 0.000000 | -3.063305 | -5.980921 |
| 106 | 6 | 0.000000 | -1.900275 | -5.196607 |
| 107 | 6 | 0.000000 | -3.072564 | -7.393443 |

|     |   |          |           |           |
|-----|---|----------|-----------|-----------|
| 108 | 6 | 0.000000 | -5.742475 | -8.108709 |
| 109 | 6 | 0.000000 | -4.583635 | -7.378970 |
| 110 | 6 | 0.000000 | -6.940690 | -7.340129 |
| 111 | 6 | 0.000000 | -4.572483 | -5.955616 |
| 112 | 6 | 0.000000 | -6.929567 | -5.955827 |
| 113 | 6 | 0.000000 | -5.719959 | -5.182896 |
| 114 | 1 | 0.000000 | -7.885034 | -5.442472 |
| 115 | 1 | 0.000000 | -7.897268 | -7.855566 |
| 116 | 1 | 0.000000 | 1.927778  | -9.269482 |
| 117 | 1 | 0.000000 | 5.772092  | -9.193942 |
| 118 | 1 | 0.000000 | -1.927778 | -9.269482 |
| 119 | 1 | 0.000000 | -5.772092 | -9.193942 |
| 120 | 6 | 0.000000 | 5.719959  | -5.182896 |

**Table S8.** The optimized Cartesian coordinates of the biphenylene molecule calculated at the B3LYP/6–31G(d) level of theory

| Center Number | Atomic Number | Coordinates (Angstroms) |           |           |
|---------------|---------------|-------------------------|-----------|-----------|
|               |               | X                       | Y         | Z         |
| 1             | 6             | 0.000000                | 0.695067  | 3.121754  |
| 2             | 6             | 0.000000                | 1.445119  | 1.915410  |
| 3             | 6             | 0.000000                | 0.711943  | 0.754433  |
| 4             | 6             | 0.000000                | -0.711943 | 0.754433  |
| 5             | 6             | 0.000000                | -0.695067 | 3.121754  |
| 6             | 6             | 0.000000                | -1.445119 | 1.915410  |
| 7             | 1             | 0.000000                | -2.531190 | 1.936247  |
| 8             | 6             | 0.000000                | 1.445119  | -1.915410 |
| 9             | 6             | 0.000000                | 0.711943  | -0.754433 |
| 10            | 6             | 0.000000                | -1.445119 | -1.915410 |
| 11            | 6             | 0.000000                | -0.695067 | -3.121754 |
| 12            | 6             | 0.000000                | 0.695067  | -3.121754 |
| 13            | 6             | 0.000000                | -0.711943 | -0.754433 |
| 14            | 1             | 0.000000                | -2.531190 | -1.936247 |
| 15            | 1             | 0.000000                | -1.224532 | -4.070869 |
| 16            | 1             | 0.000000                | 1.224532  | -4.070869 |
| 17            | 1             | 0.000000                | 1.224532  | 4.070869  |
| 18            | 1             | 0.000000                | -1.224532 | 4.070869  |
| 19            | 1             | 0.000000                | 2.531190  | 1.936247  |
| 20            | 1             | 0.000000                | 2.531190  | -1.936247 |

**Table S9.** The optimized Cartesian coordinates of the armchair biphenylene ribbon ( $n \times m = 2 \times 1$ ) calculated at the B3LYP/6–31G(d) level of theory

| Center Number | Atomic Number | Coordinates (Angstroms) |           |           |
|---------------|---------------|-------------------------|-----------|-----------|
|               |               | X                       | Y         | Z         |
| 1             | 6             | 0.000000                | 3.114530  | 1.521541  |
| 2             | 6             | 0.000000                | 3.114530  | -1.521541 |
| 3             | 6             | 0.000000                | 1.918077  | -0.740380 |
| 4             | 6             | 0.000000                | 1.918077  | 0.740380  |
| 5             | 6             | 0.000000                | 0.757388  | 1.493604  |
| 6             | 6             | 0.000000                | 0.753461  | 2.913172  |
| 7             | 6             | 0.000000                | 3.109860  | 2.909700  |
| 8             | 6             | 0.000000                | 3.109860  | -2.909700 |
| 9             | 6             | 0.000000                | 0.757388  | -1.493604 |
| 10            | 6             | 0.000000                | 1.905733  | -3.658843 |
| 11            | 6             | 0.000000                | 0.753461  | -2.913172 |
| 12            | 6             | 0.000000                | 1.905733  | 3.658843  |
| 13            | 1             | 0.000000                | 1.919702  | 4.744474  |
| 14            | 6             | 0.000000                | -1.918077 | 0.740380  |
| 15            | 6             | 0.000000                | -0.757388 | 1.493604  |
| 16            | 6             | 0.000000                | -1.905733 | 3.658843  |
| 17            | 6             | 0.000000                | -3.109860 | 2.909700  |
| 18            | 6             | 0.000000                | -3.114530 | 1.521541  |
| 19            | 6             | 0.000000                | -1.918077 | -0.740380 |
| 20            | 6             | 0.000000                | -3.114530 | -1.521541 |
| 21            | 6             | 0.000000                | -0.757388 | -1.493604 |
| 22            | 6             | 0.000000                | -3.109860 | -2.909700 |

|    |   |          |           |           |
|----|---|----------|-----------|-----------|
| 23 | 6 | 0.000000 | -0.753461 | -2.913172 |
| 24 | 6 | 0.000000 | -1.905733 | -3.658843 |
| 25 | 6 | 0.000000 | -0.753461 | 2.913172  |
| 26 | 1 | 0.000000 | -1.919702 | 4.744474  |
| 27 | 1 | 0.000000 | -4.060672 | 3.435953  |
| 28 | 1 | 0.000000 | -4.076026 | 1.019034  |
| 29 | 1 | 0.000000 | -4.076026 | -1.019034 |
| 30 | 1 | 0.000000 | -4.060672 | -3.435953 |
| 31 | 1 | 0.000000 | 4.076026  | 1.019034  |
| 32 | 1 | 0.000000 | 4.076026  | -1.019034 |
| 33 | 1 | 0.000000 | 4.060672  | 3.435953  |
| 34 | 1 | 0.000000 | 4.060672  | -3.435953 |
| 35 | 1 | 0.000000 | 1.919702  | -4.744474 |
| 36 | 1 | 0.000000 | -1.919702 | -4.744474 |

**Table S10.** The optimized Cartesian coordinates of the armchair biphenylene ribbon ( $n \times m = 3 \times 1$ ) calculated at the B3LYP/6-31G(d) level of theory

| Center Number | Atomic Number | Coordinates (Angstroms) |           |           |
|---------------|---------------|-------------------------|-----------|-----------|
|               |               | X                       | Y         | Z         |
| 1             | 6             | 0.000000                | 3.110117  | 5.119614  |
| 2             | 6             | 0.000000                | 1.907167  | 5.871575  |
| 3             | 6             | 0.000000                | 3.112461  | 3.731798  |
| 4             | 6             | 0.000000                | 0.753950  | 5.127908  |
| 5             | 6             | 0.000000                | 1.913759  | 2.952146  |
| 6             | 6             | 0.000000                | 0.756117  | 3.708207  |
| 7             | 6             | 0.000000                | -1.907167 | 5.871575  |
| 8             | 6             | 0.000000                | -3.110117 | 5.119614  |
| 9             | 6             | 0.000000                | -0.753950 | 5.127908  |
| 10            | 6             | 0.000000                | -3.112461 | 3.731798  |
| 11            | 6             | 0.000000                | -0.756117 | 3.708207  |
| 12            | 6             | 0.000000                | -1.913759 | 2.952146  |
| 13            | 1             | 0.000000                | -4.061547 | 5.644316  |
| 14            | 1             | 0.000000                | -4.072909 | 3.227864  |
| 15            | 6             | 0.000000                | 3.105557  | -0.692488 |
| 16            | 6             | 0.000000                | 3.112461  | -3.731798 |
| 17            | 6             | 0.000000                | 1.913759  | -2.952146 |
| 18            | 6             | 0.000000                | 1.911511  | -1.472797 |
| 19            | 6             | 0.000000                | 0.757509  | -0.708021 |
| 20            | 6             | 0.000000                | 0.757509  | 0.708021  |
| 21            | 6             | 0.000000                | 3.105557  | 0.692488  |
| 22            | 6             | 0.000000                | 3.110117  | -5.119614 |
| 23            | 6             | 0.000000                | 0.756117  | -3.708207 |
| 24            | 6             | 0.000000                | 1.907167  | -5.871575 |
| 25            | 6             | 0.000000                | 0.753950  | -5.127908 |
| 26            | 6             | 0.000000                | 1.911511  | 1.472797  |
| 27            | 6             | 0.000000                | -1.911511 | -1.472797 |
| 28            | 6             | 0.000000                | -0.757509 | -0.708021 |
| 29            | 6             | 0.000000                | -1.911511 | 1.472797  |
| 30            | 6             | 0.000000                | -3.105557 | 0.692488  |
| 31            | 6             | 0.000000                | -3.105557 | -0.692488 |
| 32            | 6             | 0.000000                | -1.913759 | -2.952146 |
| 33            | 6             | 0.000000                | -3.112461 | -3.731798 |
| 34            | 6             | 0.000000                | -0.756117 | -3.708207 |
| 35            | 6             | 0.000000                | -3.110117 | -5.119614 |
| 36            | 6             | 0.000000                | -0.753950 | -5.127908 |
| 37            | 6             | 0.000000                | -1.907167 | -5.871575 |
| 38            | 6             | 0.000000                | -0.757509 | 0.708021  |
| 39            | 1             | 0.000000                | 1.923650  | -6.957113 |
| 40            | 1             | 0.000000                | -4.067870 | 1.192745  |
| 41            | 1             | 0.000000                | -4.067870 | -1.192745 |
| 42            | 1             | 0.000000                | -4.072909 | -3.227864 |
| 43            | 1             | 0.000000                | -4.061547 | -5.644316 |
| 44            | 1             | 0.000000                | -1.923650 | -6.957113 |
| 45            | 1             | 0.000000                | 4.061547  | 5.644316  |
| 46            | 1             | 0.000000                | 1.923650  | 6.957113  |
| 47            | 1             | 0.000000                | 4.072909  | 3.227864  |
| 48            | 1             | 0.000000                | -1.923650 | 6.957113  |
| 49            | 1             | 0.000000                | 4.067870  | -1.192745 |
| 50            | 1             | 0.000000                | 4.072909  | -3.227864 |
| 51            | 1             | 0.000000                | 4.067870  | 1.192745  |
| 52            | 1             | 0.000000                | 4.061547  | -5.644316 |

**Table S11.** The optimized Cartesian coordinates of the armchair biphenylene ribbon ( $n \times m = 4 \times 1$ ) calculated at the B3LYP/6–31G(d) level of theory

| Center Number | Atomic Number | Coordinates (Angstroms) |           |           |
|---------------|---------------|-------------------------|-----------|-----------|
|               |               | X                       | Y         | Z         |
| 1             | 6             | 0.000000                | 3.112400  | 5.943044  |
| 2             | 6             | 0.000000                | 3.104497  | 2.903204  |
| 3             | 6             | 0.000000                | 1.911268  | 3.685028  |
| 4             | 6             | 0.000000                | 1.913660  | 5.163746  |
| 5             | 6             | 0.000000                | 0.756435  | 5.919678  |
| 6             | 6             | 0.000000                | 0.753686  | 7.338612  |
| 7             | 6             | 0.000000                | 3.110133  | 7.331117  |
| 8             | 6             | 0.000000                | 3.103568  | 1.517811  |
| 9             | 6             | 0.000000                | 0.757536  | 2.921014  |
| 10            | 6             | 0.000000                | 1.907920  | 0.738630  |
| 11            | 6             | 0.000000                | 0.756433  | 1.506321  |
| 12            | 6             | 0.000000                | 1.907076  | 8.082985  |
| 13            | 1             | 0.000000                | 1.924021  | 9.168494  |
| 14            | 6             | 0.000000                | -1.913660 | 5.163746  |
| 15            | 6             | 0.000000                | -0.756435 | 5.919678  |
| 16            | 6             | 0.000000                | -1.907076 | 8.082985  |
| 17            | 6             | 0.000000                | -3.110133 | 7.331117  |
| 18            | 6             | 0.000000                | -3.112400 | 5.943044  |
| 19            | 6             | 0.000000                | -1.911268 | 3.685028  |
| 20            | 6             | 0.000000                | -3.104497 | 2.903204  |
| 21            | 6             | 0.000000                | -0.757536 | 2.921014  |
| 22            | 6             | 0.000000                | -3.103568 | 1.517811  |
| 23            | 6             | 0.000000                | -0.756433 | 1.506321  |
| 24            | 6             | 0.000000                | -1.907920 | 0.738630  |
| 25            | 6             | 0.000000                | -0.753686 | 7.338612  |
| 26            | 1             | 0.000000                | -1.924021 | 9.168494  |
| 27            | 1             | 0.000000                | -4.061428 | 7.856156  |
| 28            | 1             | 0.000000                | -4.073256 | 5.440036  |
| 29            | 1             | 0.000000                | -4.067907 | 3.401229  |
| 30            | 1             | 0.000000                | -4.066068 | 1.017625  |
| 31            | 6             | 0.000000                | 3.104497  | -2.903204 |
| 32            | 6             | 0.000000                | 3.112400  | -5.943044 |
| 33            | 6             | 0.000000                | 1.913660  | -5.163746 |
| 34            | 6             | 0.000000                | 1.911268  | -3.685028 |
| 35            | 6             | 0.000000                | 0.757536  | -2.921014 |
| 36            | 6             | 0.000000                | 0.756433  | -1.506321 |
| 37            | 6             | 0.000000                | 3.103568  | -1.517811 |
| 38            | 6             | 0.000000                | 3.110133  | -7.331117 |
| 39            | 6             | 0.000000                | 0.756435  | -5.919678 |
| 40            | 6             | 0.000000                | 1.907076  | -8.082985 |
| 41            | 6             | 0.000000                | 0.753686  | -7.338612 |
| 42            | 6             | 0.000000                | 1.907920  | -0.738630 |
| 43            | 6             | 0.000000                | -1.911268 | -3.685028 |
| 44            | 6             | 0.000000                | -0.757536 | -2.921014 |
| 45            | 6             | 0.000000                | -1.907920 | -0.738630 |
| 46            | 6             | 0.000000                | -3.103568 | -1.517811 |
| 47            | 6             | 0.000000                | -3.104497 | -2.903204 |
| 48            | 6             | 0.000000                | -1.913660 | -5.163746 |
| 49            | 6             | 0.000000                | -3.112400 | -5.943044 |
| 50            | 6             | 0.000000                | -0.756435 | -5.919678 |
| 51            | 6             | 0.000000                | -3.110133 | -7.331117 |
| 52            | 6             | 0.000000                | -0.753686 | -7.338612 |
| 53            | 6             | 0.000000                | -1.907076 | -8.082985 |
| 54            | 6             | 0.000000                | -0.756433 | -1.506321 |
| 55            | 1             | 0.000000                | 1.924021  | -9.168494 |
| 56            | 1             | 0.000000                | -4.066068 | -1.017625 |
| 57            | 1             | 0.000000                | -4.067907 | -3.401229 |
| 58            | 1             | 0.000000                | -4.073256 | -5.440036 |
| 59            | 1             | 0.000000                | -4.061428 | -7.856156 |
| 60            | 1             | 0.000000                | -1.924021 | -9.168494 |
| 61            | 1             | 0.000000                | 4.073256  | 5.440036  |
| 62            | 1             | 0.000000                | 4.067907  | 3.401229  |
| 63            | 1             | 0.000000                | 4.061428  | 7.856156  |
| 64            | 1             | 0.000000                | 4.066068  | 1.017625  |
| 65            | 1             | 0.000000                | 4.067907  | -3.401229 |
| 66            | 1             | 0.000000                | 4.073256  | -5.440036 |
| 67            | 1             | 0.000000                | 4.066068  | -1.017625 |
| 68            | 1             | 0.000000                | 4.061428  | -7.856156 |

**Table S12.** The optimized Cartesian coordinates of the armchair biphenylene ribbon ( $n \times m = 5 \times 1$ ) calculated at the B3LYP/6–31G(d) level of theory

| Center Number | Atomic Number | Coordinates (Angstroms) |           |            |
|---------------|---------------|-------------------------|-----------|------------|
|               |               | X                       | Y         | Z          |
| 1             | 6             | 0.000000                | 3.113023  | 8.153092   |
| 2             | 6             | 0.000000                | 1.912659  | 5.895375   |
| 3             | 6             | 0.000000                | 1.914925  | 7.373948   |
| 4             | 6             | 0.000000                | 0.756512  | 8.129491   |
| 5             | 6             | 0.000000                | 0.753630  | 9.548970   |
| 6             | 6             | 0.000000                | 3.110343  | 9.541011   |
| 7             | 6             | 0.000000                | 3.104462  | 3.728846   |
| 8             | 6             | 0.000000                | 0.757607  | 5.131804   |
| 9             | 6             | 0.000000                | 1.909503  | 2.949903   |
| 10            | 6             | 0.000000                | 0.756633  | 3.716404   |
| 11            | 6             | 0.000000                | 1.907589  | 10.292654  |
| 12            | 1             | 0.000000                | 1.923725  | 11.378296  |
| 13            | 6             | 0.000000                | -1.914925 | 7.373948   |
| 14            | 6             | 0.000000                | -0.756512 | 8.129491   |
| 15            | 6             | 0.000000                | -1.907589 | 10.292654  |
| 16            | 6             | 0.000000                | -3.110343 | 9.541011   |
| 17            | 6             | 0.000000                | -3.113023 | 8.153092   |
| 18            | 6             | 0.000000                | -1.912659 | 5.895375   |
| 19            | 6             | 0.000000                | -3.105481 | 5.113878   |
| 20            | 6             | 0.000000                | -0.757607 | 5.131804   |
| 21            | 6             | 0.000000                | -3.104462 | 3.728846   |
| 22            | 6             | 0.000000                | -0.756633 | 3.716404   |
| 23            | 6             | 0.000000                | -1.909503 | 2.949903   |
| 24            | 6             | 0.000000                | -0.753630 | 9.548970   |
| 25            | 1             | 0.000000                | -1.923725 | 11.378296  |
| 26            | 1             | 0.000000                | -4.061920 | 10.065692  |
| 27            | 1             | 0.000000                | -4.073777 | 7.649611   |
| 28            | 1             | 0.000000                | -4.068508 | 5.612911   |
| 29            | 1             | 0.000000                | -4.066563 | 3.228032   |
| 30            | 6             | 0.000000                | 3.103756  | -0.692504  |
| 31            | 6             | 0.000000                | 1.909560  | -1.473244  |
| 32            | 6             | 0.000000                | 0.756560  | -0.707609  |
| 33            | 6             | 0.000000                | 0.756560  | 0.707609   |
| 34            | 6             | 0.000000                | 3.103756  | 0.692504   |
| 35            | 6             | 0.000000                | 1.909560  | 1.473244   |
| 36            | 6             | 0.000000                | -1.909560 | -1.473244  |
| 37            | 6             | 0.000000                | -0.756560 | -0.707609  |
| 38            | 6             | 0.000000                | -1.909560 | 1.473244   |
| 39            | 6             | 0.000000                | -3.103756 | 0.692504   |
| 40            | 6             | 0.000000                | -3.103756 | -0.692504  |
| 41            | 6             | 0.000000                | -0.756560 | 0.707609   |
| 42            | 1             | 0.000000                | -4.066445 | 1.192167   |
| 43            | 1             | 0.000000                | -4.066445 | -1.192167  |
| 44            | 1             | 0.000000                | 4.073777  | 7.649611   |
| 45            | 1             | 0.000000                | 4.061920  | 10.065692  |
| 46            | 1             | 0.000000                | 4.066563  | 3.228032   |
| 47            | 1             | 0.000000                | 4.066445  | -1.192167  |
| 48            | 1             | 0.000000                | 4.066445  | 1.192167   |
| 49            | 6             | 0.000000                | 3.104462  | -3.728846  |
| 50            | 6             | 0.000000                | 1.909503  | -2.949903  |
| 51            | 6             | 0.000000                | 3.105481  | -5.113878  |
| 52            | 6             | 0.000000                | 0.756633  | -3.716404  |
| 53            | 6             | 0.000000                | 1.912659  | -5.895375  |
| 54            | 6             | 0.000000                | 0.757607  | -5.131804  |
| 55            | 6             | 0.000000                | -1.909503 | -2.949903  |
| 56            | 6             | 0.000000                | -3.104462 | -3.728846  |
| 57            | 6             | 0.000000                | -0.756633 | -3.716404  |
| 58            | 6             | 0.000000                | -3.105481 | -5.113878  |
| 59            | 6             | 0.000000                | -0.757607 | -5.131804  |
| 60            | 6             | 0.000000                | -1.912659 | -5.895375  |
| 61            | 1             | 0.000000                | -4.066563 | -3.228032  |
| 62            | 1             | 0.000000                | -4.068508 | -5.612911  |
| 63            | 1             | 0.000000                | 4.066563  | -3.228032  |
| 64            | 1             | 0.000000                | 4.068508  | -5.612911  |
| 65            | 6             | 0.000000                | 3.113023  | -8.153092  |
| 66            | 6             | 0.000000                | 1.914925  | -7.373948  |
| 67            | 6             | 0.000000                | 3.110343  | -9.541011  |
| 68            | 6             | 0.000000                | 0.756512  | -8.129491  |
| 69            | 6             | 0.000000                | 1.907589  | -10.292654 |
| 70            | 6             | 0.000000                | 0.753630  | -9.548970  |

|    |   |          |           |            |
|----|---|----------|-----------|------------|
| 71 | 6 | 0.000000 | -1.914925 | -7.373948  |
| 72 | 6 | 0.000000 | -3.113023 | -8.153092  |
| 73 | 6 | 0.000000 | -0.756512 | -8.129491  |
| 74 | 6 | 0.000000 | -3.110343 | -9.541011  |
| 75 | 6 | 0.000000 | -0.753630 | -9.548970  |
| 76 | 6 | 0.000000 | -1.907589 | -10.292654 |
| 77 | 1 | 0.000000 | 1.923725  | -11.378296 |
| 78 | 1 | 0.000000 | -4.073777 | -7.649611  |
| 79 | 1 | 0.000000 | -4.061920 | -10.065692 |
| 80 | 1 | 0.000000 | -1.923725 | -11.378296 |
| 81 | 1 | 0.000000 | 4.073777  | -7.649611  |
| 82 | 1 | 0.000000 | 4.061920  | -10.065692 |
| 83 | 6 | 0.000000 | 3.105481  | 5.113878   |
| 84 | 1 | 0.000000 | 4.068508  | 5.612911   |

**Table S13.** The optimized Cartesian coordinates of the armchair biphenylene ribbon ( $n \times m = 6 \times 1$ ) calculated at the B3LYP/6-31G(d) level of theory

| Center Number | Atomic Number | Coordinates (Angstroms) |           |           |
|---------------|---------------|-------------------------|-----------|-----------|
|               |               | X                       | Y         | Z         |
| 1             | 6             | 0.000000                | 3.112566  | 10.363746 |
| 2             | 6             | 0.000000                | 1.912341  | 8.106587  |
| 3             | 6             | 0.000000                | 1.914560  | 9.584802  |
| 4             | 6             | 0.000000                | 0.756486  | 10.340436 |
| 5             | 6             | 0.000000                | 0.753612  | 11.759542 |
| 6             | 6             | 0.000000                | 3.110078  | 11.752031 |
| 7             | 6             | 0.000000                | 3.104196  | 5.939951  |
| 8             | 6             | 0.000000                | 0.757665  | 7.342816  |
| 9             | 6             | 0.000000                | 1.909439  | 5.160910  |
| 10            | 6             | 0.000000                | 0.756608  | 5.927636  |
| 11            | 6             | 0.000000                | 1.907498  | 12.503540 |
| 12            | 1             | 0.000000                | 1.923301  | 13.589204 |
| 13            | 6             | 0.000000                | -1.914560 | 9.584802  |
| 14            | 6             | 0.000000                | -0.756486 | 10.340436 |
| 15            | 6             | 0.000000                | -1.907498 | 12.503540 |
| 16            | 6             | 0.000000                | -3.110078 | 11.752031 |
| 17            | 6             | 0.000000                | -3.112566 | 10.363746 |
| 18            | 6             | 0.000000                | -1.912341 | 8.106587  |
| 19            | 6             | 0.000000                | -3.105018 | 7.325328  |
| 20            | 6             | 0.000000                | -0.757665 | 7.342816  |
| 21            | 6             | 0.000000                | -3.104196 | 5.939951  |
| 22            | 6             | 0.000000                | -0.756608 | 5.927636  |
| 23            | 6             | 0.000000                | -1.909439 | 5.160910  |
| 24            | 6             | 0.000000                | -0.753612 | 11.759542 |
| 25            | 1             | 0.000000                | -1.923301 | 13.589204 |
| 26            | 1             | 0.000000                | -4.061934 | 12.276311 |
| 27            | 1             | 0.000000                | -4.073576 | 9.860598  |
| 28            | 1             | 0.000000                | -4.068279 | 7.824028  |
| 29            | 1             | 0.000000                | -4.066599 | 5.439546  |
| 30            | 6             | 0.000000                | 3.103789  | 1.518623  |
| 31            | 6             | 0.000000                | 1.909863  | 0.738046  |
| 32            | 6             | 0.000000                | 0.756773  | 1.503586  |
| 33            | 6             | 0.000000                | 0.756584  | 2.918562  |
| 34            | 6             | 0.000000                | 3.103661  | 2.903966  |
| 35            | 6             | 0.000000                | 1.909521  | 3.684545  |
| 36            | 6             | 0.000000                | -1.909863 | 0.738046  |
| 37            | 6             | 0.000000                | -0.756773 | 1.503586  |
| 38            | 6             | 0.000000                | -1.909521 | 3.684545  |
| 39            | 6             | 0.000000                | -3.103661 | 2.903966  |
| 40            | 6             | 0.000000                | -3.103789 | 1.518623  |
| 41            | 6             | 0.000000                | -0.756584 | 2.918562  |
| 42            | 1             | 0.000000                | -4.066493 | 3.403492  |
| 43            | 1             | 0.000000                | -4.066711 | 1.019279  |
| 44            | 1             | 0.000000                | 4.073576  | 9.860598  |
| 45            | 1             | 0.000000                | 4.061934  | 12.276311 |
| 46            | 1             | 0.000000                | 4.066599  | 5.439546  |
| 47            | 1             | 0.000000                | 4.066711  | 1.019279  |
| 48            | 1             | 0.000000                | 4.066493  | 3.403492  |
| 49            | 6             | 0.000000                | 3.103789  | -1.518623 |
| 50            | 6             | 0.000000                | 1.909863  | -0.738046 |



|     |   |          |           |            |
|-----|---|----------|-----------|------------|
| 51  | 6 | 0.000000 | 3.103661  | -2.903966  |
| 52  | 6 | 0.000000 | 0.756773  | -1.503586  |
| 53  | 6 | 0.000000 | 1.909521  | -3.684545  |
| 54  | 6 | 0.000000 | 0.756584  | -2.918562  |
| 55  | 6 | 0.000000 | -1.909863 | -0.738046  |
| 56  | 6 | 0.000000 | -3.103789 | -1.518623  |
| 57  | 6 | 0.000000 | -0.756773 | -1.503586  |
| 58  | 6 | 0.000000 | -3.103661 | -2.903966  |
| 59  | 6 | 0.000000 | -0.756584 | -2.918562  |
| 60  | 6 | 0.000000 | -1.909521 | -3.684545  |
| 61  | 1 | 0.000000 | -4.066711 | -1.019279  |
| 62  | 1 | 0.000000 | -4.066493 | -3.403492  |
| 63  | 1 | 0.000000 | 4.066711  | -1.019279  |
| 64  | 1 | 0.000000 | 4.066493  | -3.403492  |
| 65  | 6 | 0.000000 | 3.104196  | -5.939951  |
| 66  | 6 | 0.000000 | 1.909439  | -5.160910  |
| 67  | 6 | 0.000000 | 3.105018  | -7.325328  |
| 68  | 6 | 0.000000 | 0.756608  | -5.927636  |
| 69  | 6 | 0.000000 | 1.912341  | -8.106587  |
| 70  | 6 | 0.000000 | 0.757665  | -7.342816  |
| 71  | 6 | 0.000000 | -1.909439 | -5.160910  |
| 72  | 6 | 0.000000 | -3.104196 | -5.939951  |
| 73  | 6 | 0.000000 | -0.756608 | -5.927636  |
| 74  | 6 | 0.000000 | -3.105018 | -7.325328  |
| 75  | 6 | 0.000000 | -0.757665 | -7.342816  |
| 76  | 6 | 0.000000 | -1.912341 | -8.106587  |
| 77  | 1 | 0.000000 | -4.066599 | -5.439546  |
| 78  | 1 | 0.000000 | -4.068279 | -7.824028  |
| 79  | 1 | 0.000000 | 4.066599  | -5.439546  |
| 80  | 1 | 0.000000 | 4.068279  | -7.824028  |
| 81  | 6 | 0.000000 | 3.105018  | 7.325328   |
| 82  | 1 | 0.000000 | 4.068279  | 7.824028   |
| 83  | 6 | 0.000000 | 3.110078  | -11.752031 |
| 84  | 6 | 0.000000 | 1.907498  | -12.503540 |
| 85  | 6 | 0.000000 | 0.753612  | -11.759542 |
| 86  | 6 | 0.000000 | 0.756486  | -10.340436 |
| 87  | 6 | 0.000000 | 3.112566  | -10.363746 |
| 88  | 6 | 0.000000 | 1.914560  | -9.584802  |
| 89  | 6 | 0.000000 | -1.907498 | -12.503540 |
| 90  | 6 | 0.000000 | -0.753612 | -11.759542 |
| 91  | 6 | 0.000000 | -1.914560 | -9.584802  |
| 92  | 6 | 0.000000 | -3.112566 | -10.363746 |
| 93  | 6 | 0.000000 | -3.110078 | -11.752031 |
| 94  | 6 | 0.000000 | -0.756486 | -10.340436 |
| 95  | 1 | 0.000000 | -4.073576 | -9.860598  |
| 96  | 1 | 0.000000 | -4.061934 | -12.276311 |
| 97  | 1 | 0.000000 | 4.061934  | -12.276311 |
| 98  | 1 | 0.000000 | 4.073576  | -9.860598  |
| 99  | 1 | 0.000000 | 1.923301  | -13.589204 |
| 100 | 1 | 0.000000 | -1.923301 | -13.589204 |

**Table S14.** The optimized Cartesian coordinates of the armchair biphenylene ribbon ( $n \times m = 7 \times 1$ ) calculated at the B3LYP/6-31G(d) level of theory

| Center Number | Atomic Number | Coordinates (Angstroms) |           |           |
|---------------|---------------|-------------------------|-----------|-----------|
|               |               | X                       | Y         | Z         |
| 1             | 6             | 0.000000                | 3.113113  | 12.575101 |
| 2             | 6             | 0.000000                | 1.912603  | 10.317191 |
| 3             | 6             | 0.000000                | 1.915058  | 11.795661 |
| 4             | 6             | 0.000000                | 0.756471  | 12.551251 |
| 5             | 6             | 0.000000                | 0.753678  | 13.970684 |
| 6             | 6             | 0.000000                | 3.110123  | 13.963293 |
| 7             | 6             | 0.000000                | 3.103643  | 8.149817  |
| 8             | 6             | 0.000000                | 0.757456  | 9.553391  |
| 9             | 6             | 0.000000                | 1.908436  | 7.371544  |
| 10            | 6             | 0.000000                | 0.756565  | 8.138347  |
| 11            | 6             | 0.000000                | 1.907419  | 14.714517 |
| 12            | 1             | 0.000000                | 1.923058  | 15.800117 |
| 13            | 6             | 0.000000                | -1.915058 | 11.795661 |
| 14            | 6             | 0.000000                | -0.756471 | 12.551251 |

|    |   |          |           |            |
|----|---|----------|-----------|------------|
| 15 | 6 | 0.000000 | -1.907419 | 14.714517  |
| 16 | 6 | 0.000000 | -3.110123 | 13.963293  |
| 17 | 6 | 0.000000 | -3.113113 | 12.575101  |
| 18 | 6 | 0.000000 | -1.912603 | 10.317191  |
| 19 | 6 | 0.000000 | -3.105415 | 9.535245   |
| 20 | 6 | 0.000000 | -0.757456 | 9.553391   |
| 21 | 6 | 0.000000 | -3.103643 | 8.149817   |
| 22 | 6 | 0.000000 | -0.756565 | 8.138347   |
| 23 | 6 | 0.000000 | -1.908436 | 7.371544   |
| 24 | 6 | 0.000000 | -0.753678 | 13.970684  |
| 25 | 1 | 0.000000 | -1.923058 | 15.800117  |
| 26 | 1 | 0.000000 | -4.061862 | 14.487695  |
| 27 | 1 | 0.000000 | -4.074122 | 12.071655  |
| 28 | 1 | 0.000000 | -4.068828 | 10.034056  |
| 29 | 1 | 0.000000 | -4.065964 | 7.649258   |
| 30 | 6 | 0.000000 | 3.103178  | 3.729773   |
| 31 | 6 | 0.000000 | 1.908738  | 2.949147   |
| 32 | 6 | 0.000000 | 0.756369  | 3.715031   |
| 33 | 6 | 0.000000 | 0.756329  | 5.129340   |
| 34 | 6 | 0.000000 | 3.102780  | 5.115297   |
| 35 | 6 | 0.000000 | 1.908208  | 5.895514   |
| 36 | 6 | 0.000000 | -1.908738 | 2.949147   |
| 37 | 6 | 0.000000 | -0.756369 | 3.715031   |
| 38 | 6 | 0.000000 | -1.908208 | 5.895514   |
| 39 | 6 | 0.000000 | -3.102780 | 5.115297   |
| 40 | 6 | 0.000000 | -3.103178 | 3.729773   |
| 41 | 6 | 0.000000 | -0.756329 | 5.129340   |
| 42 | 1 | 0.000000 | -4.065756 | 5.614668   |
| 43 | 1 | 0.000000 | -4.066296 | 3.230383   |
| 44 | 1 | 0.000000 | 4.074122  | 12.071655  |
| 45 | 1 | 0.000000 | 4.061862  | 14.487695  |
| 46 | 1 | 0.000000 | 4.065964  | 7.649258   |
| 47 | 1 | 0.000000 | 4.066296  | 3.230383   |
| 48 | 1 | 0.000000 | 4.065756  | 5.614668   |
| 49 | 6 | 0.000000 | 3.103416  | 0.692802   |
| 50 | 6 | 0.000000 | 1.908803  | 1.473151   |
| 51 | 6 | 0.000000 | 3.103416  | -0.692802  |
| 52 | 6 | 0.000000 | 0.756422  | 0.707133   |
| 53 | 6 | 0.000000 | 1.908803  | -1.473151  |
| 54 | 6 | 0.000000 | 0.756422  | -0.707133  |
| 55 | 6 | 0.000000 | -1.908803 | 1.473151   |
| 56 | 6 | 0.000000 | -3.103416 | 0.692802   |
| 57 | 6 | 0.000000 | -0.756422 | 0.707133   |
| 58 | 6 | 0.000000 | -3.103416 | -0.692802  |
| 59 | 6 | 0.000000 | -0.756422 | -0.707133  |
| 60 | 6 | 0.000000 | -1.908803 | -1.473151  |
| 61 | 1 | 0.000000 | -4.066425 | 1.192387   |
| 62 | 1 | 0.000000 | -4.066425 | -1.192387  |
| 63 | 1 | 0.000000 | 4.066425  | 1.192387   |
| 64 | 1 | 0.000000 | 4.066425  | -1.192387  |
| 65 | 6 | 0.000000 | 3.103178  | -3.729773  |
| 66 | 6 | 0.000000 | 1.908738  | -2.949147  |
| 67 | 6 | 0.000000 | 3.102780  | -5.115297  |
| 68 | 6 | 0.000000 | 0.756369  | -3.715031  |
| 69 | 6 | 0.000000 | 1.908208  | -5.895514  |
| 70 | 6 | 0.000000 | 0.756329  | -5.129340  |
| 71 | 6 | 0.000000 | -1.908738 | -2.949147  |
| 72 | 6 | 0.000000 | -3.103178 | -3.729773  |
| 73 | 6 | 0.000000 | -0.756369 | -3.715031  |
| 74 | 6 | 0.000000 | -3.102780 | -5.115297  |
| 75 | 6 | 0.000000 | -0.756329 | -5.129340  |
| 76 | 6 | 0.000000 | -1.908208 | -5.895514  |
| 77 | 1 | 0.000000 | -4.066296 | -3.230383  |
| 78 | 1 | 0.000000 | -4.065756 | -5.614668  |
| 79 | 1 | 0.000000 | 4.066296  | -3.230383  |
| 80 | 1 | 0.000000 | 4.065756  | -5.614668  |
| 81 | 6 | 0.000000 | 3.105415  | 9.535245   |
| 82 | 1 | 0.000000 | 4.068828  | 10.034056  |
| 83 | 6 | 0.000000 | 3.105415  | -9.535245  |
| 84 | 6 | 0.000000 | 1.915058  | -11.795661 |
| 85 | 6 | 0.000000 | 1.912603  | -10.317191 |
| 86 | 6 | 0.000000 | 0.757456  | -9.553391  |
| 87 | 6 | 0.000000 | 0.756565  | -8.138347  |
| 88 | 6 | 0.000000 | 3.103643  | -8.149817  |
| 89 | 6 | 0.000000 | 3.110123  | -13.963293 |
| 90 | 6 | 0.000000 | 0.756471  | -12.551251 |
| 91 | 6 | 0.000000 | 1.907419  | -14.714517 |
| 92 | 6 | 0.000000 | 0.753678  | -13.970684 |
| 93 | 6 | 0.000000 | 1.908436  | -7.371544  |

|     |   |          |           |            |
|-----|---|----------|-----------|------------|
| 94  | 6 | 0.000000 | -1.912603 | -10.317191 |
| 95  | 6 | 0.000000 | -0.757456 | -9.553391  |
| 96  | 6 | 0.000000 | -1.908436 | -7.371544  |
| 97  | 6 | 0.000000 | -3.103643 | -8.149817  |
| 98  | 6 | 0.000000 | -3.105415 | -9.535245  |
| 99  | 6 | 0.000000 | -1.915058 | -11.795661 |
| 100 | 6 | 0.000000 | -3.113113 | -12.575101 |
| 101 | 6 | 0.000000 | -0.756471 | -12.551251 |
| 102 | 6 | 0.000000 | -3.110123 | -13.963293 |
| 103 | 6 | 0.000000 | -0.753678 | -13.970684 |
| 104 | 6 | 0.000000 | -1.907419 | -14.714517 |
| 105 | 6 | 0.000000 | -0.756565 | -8.138347  |
| 106 | 1 | 0.000000 | -4.065964 | -7.649258  |
| 107 | 1 | 0.000000 | -4.068828 | -10.034056 |
| 108 | 1 | 0.000000 | -4.074122 | -12.071655 |
| 109 | 1 | 0.000000 | -4.061862 | -14.487695 |
| 110 | 1 | 0.000000 | 4.068828  | -10.034056 |
| 111 | 1 | 0.000000 | 4.065964  | -7.649258  |
| 112 | 1 | 0.000000 | 4.061862  | -14.487695 |
| 113 | 6 | 0.000000 | 3.113113  | -12.575101 |
| 114 | 1 | 0.000000 | 4.074122  | -12.071655 |
| 115 | 1 | 0.000000 | 1.923058  | -15.800117 |
| 116 | 1 | 0.000000 | -1.923058 | -15.800117 |

**Table S15.** The optimized Cartesian coordinates of the armchair biphenylene ribbon ( $n \times m = 8 \times 1$ ) calculated at the B3LYP/6-31G(d) level of theory

| Center Number | Atomic Number | Coordinates (Angstroms) |           |           |
|---------------|---------------|-------------------------|-----------|-----------|
|               |               | X                       | Y         | Z         |
| 1             | 6             | 0.000000                | 3.112537  | 14.785697 |
| 2             | 6             | 0.000000                | 1.911854  | 12.528545 |
| 3             | 6             | 0.000000                | 1.914270  | 14.006778 |
| 4             | 6             | 0.000000                | 0.756357  | 14.762482 |
| 5             | 6             | 0.000000                | 0.753585  | 16.181677 |
| 6             | 6             | 0.000000                | 3.110079  | 16.173915 |
| 7             | 6             | 0.000000                | 3.103701  | 10.361623 |
| 8             | 6             | 0.000000                | 0.757402  | 11.764657 |
| 9             | 6             | 0.000000                | 1.908479  | 9.582954  |
| 10            | 6             | 0.000000                | 0.756431  | 10.349808 |
| 11            | 6             | 0.000000                | 1.907417  | 16.925539 |
| 12            | 1             | 0.000000                | 1.923423  | 18.011200 |
| 13            | 6             | 0.000000                | -1.914270 | 14.006778 |
| 14            | 6             | 0.000000                | -0.756357 | 14.762482 |
| 15            | 6             | 0.000000                | -1.907417 | 16.925539 |
| 16            | 6             | 0.000000                | -3.110079 | 16.173915 |
| 17            | 6             | 0.000000                | -3.112537 | 14.785697 |
| 18            | 6             | 0.000000                | -1.911854 | 12.528545 |
| 19            | 6             | 0.000000                | -3.104847 | 11.747084 |
| 20            | 6             | 0.000000                | -0.757402 | 11.764657 |
| 21            | 6             | 0.000000                | -3.103701 | 10.361623 |
| 22            | 6             | 0.000000                | -0.756431 | 10.349808 |
| 23            | 6             | 0.000000                | -1.908479 | 9.582954  |
| 24            | 6             | 0.000000                | -0.753585 | 16.181677 |
| 25            | 1             | 0.000000                | -1.923423 | 18.011200 |
| 26            | 1             | 0.000000                | -4.061928 | 16.698266 |
| 27            | 1             | 0.000000                | -4.073496 | 14.282304 |
| 28            | 1             | 0.000000                | -4.068195 | 12.245855 |
| 29            | 1             | 0.000000                | -4.066143 | 9.861119  |
| 30            | 6             | 0.000000                | 3.103468  | 5.940940  |
| 31            | 6             | 0.000000                | 1.909092  | 5.160288  |
| 32            | 6             | 0.000000                | 0.756473  | 5.926022  |
| 33            | 6             | 0.000000                | 0.756376  | 7.340563  |
| 34            | 6             | 0.000000                | 3.103118  | 7.326415  |
| 35            | 6             | 0.000000                | 1.908520  | 8.106748  |
| 36            | 6             | 0.000000                | -1.909092 | 5.160288  |
| 37            | 6             | 0.000000                | -0.756473 | 5.926022  |
| 38            | 6             | 0.000000                | -1.908520 | 8.106748  |
| 39            | 6             | 0.000000                | -3.103118 | 7.326415  |
| 40            | 6             | 0.000000                | -3.103468 | 5.940940  |
| 41            | 6             | 0.000000                | -0.756376 | 7.340563  |
| 42            | 1             | 0.000000                | -4.066041 | 7.825963  |

|     |   |          |           |            |
|-----|---|----------|-----------|------------|
| 43  | 1 | 0.000000 | -4.066540 | 5.441545   |
| 44  | 1 | 0.000000 | 4.073496  | 14.282304  |
| 45  | 1 | 0.000000 | 4.061928  | 16.698266  |
| 46  | 1 | 0.000000 | 4.066143  | 9.861119   |
| 47  | 1 | 0.000000 | 4.066540  | 5.441545   |
| 48  | 1 | 0.000000 | 4.066041  | 7.825963   |
| 49  | 6 | 0.000000 | 3.103610  | 2.903792   |
| 50  | 6 | 0.000000 | 1.909102  | 3.684228   |
| 51  | 6 | 0.000000 | 3.103547  | 1.518313   |
| 52  | 6 | 0.000000 | 0.756498  | 2.918331   |
| 53  | 6 | 0.000000 | 1.909005  | 0.737999   |
| 54  | 6 | 0.000000 | 0.756510  | 1.503874   |
| 55  | 6 | 0.000000 | -1.909102 | 3.684228   |
| 56  | 6 | 0.000000 | -3.103610 | 2.903792   |
| 57  | 6 | 0.000000 | -0.756498 | 2.918331   |
| 58  | 6 | 0.000000 | -3.103547 | 1.518313   |
| 59  | 6 | 0.000000 | -0.756510 | 1.503874   |
| 60  | 6 | 0.000000 | -1.909005 | 0.737999   |
| 61  | 1 | 0.000000 | -4.066549 | 3.403426   |
| 62  | 1 | 0.000000 | -4.066489 | 1.018740   |
| 63  | 1 | 0.000000 | 4.066549  | 3.403426   |
| 64  | 1 | 0.000000 | 4.066489  | 1.018740   |
| 65  | 6 | 0.000000 | 3.103547  | -1.518313  |
| 66  | 6 | 0.000000 | 1.909005  | -0.737999  |
| 67  | 6 | 0.000000 | 3.103610  | -2.903792  |
| 68  | 6 | 0.000000 | 0.756510  | -1.503874  |
| 69  | 6 | 0.000000 | 1.909102  | -3.684228  |
| 70  | 6 | 0.000000 | 0.756498  | -2.918331  |
| 71  | 6 | 0.000000 | -1.909005 | -0.737999  |
| 72  | 6 | 0.000000 | -3.103547 | -1.518313  |
| 73  | 6 | 0.000000 | -0.756510 | -1.503874  |
| 74  | 6 | 0.000000 | -3.103610 | -2.903792  |
| 75  | 6 | 0.000000 | -0.756498 | -2.918331  |
| 76  | 6 | 0.000000 | -1.909102 | -3.684228  |
| 77  | 1 | 0.000000 | -4.066489 | -1.018740  |
| 78  | 1 | 0.000000 | -4.066549 | -3.403426  |
| 79  | 1 | 0.000000 | 4.066489  | -1.018740  |
| 80  | 1 | 0.000000 | 4.066549  | -3.403426  |
| 81  | 6 | 0.000000 | 3.104847  | 11.747084  |
| 82  | 1 | 0.000000 | 4.068195  | 12.245855  |
| 83  | 6 | 0.000000 | 3.103118  | -7.326415  |
| 84  | 6 | 0.000000 | 1.908479  | -9.582954  |
| 85  | 6 | 0.000000 | 1.908520  | -8.106748  |
| 86  | 6 | 0.000000 | 0.756376  | -7.340563  |
| 87  | 6 | 0.000000 | 0.756473  | -5.926022  |
| 88  | 6 | 0.000000 | 3.103468  | -5.940940  |
| 89  | 6 | 0.000000 | 3.104847  | -11.747084 |
| 90  | 6 | 0.000000 | 0.756431  | -10.349808 |
| 91  | 6 | 0.000000 | 1.911854  | -12.528545 |
| 92  | 6 | 0.000000 | 0.757402  | -11.764657 |
| 93  | 6 | 0.000000 | 1.909092  | -5.160288  |
| 94  | 6 | 0.000000 | -1.908520 | -8.106748  |
| 95  | 6 | 0.000000 | -0.756376 | -7.340563  |
| 96  | 6 | 0.000000 | -1.909092 | -5.160288  |
| 97  | 6 | 0.000000 | -3.103468 | -5.940940  |
| 98  | 6 | 0.000000 | -3.103118 | -7.326415  |
| 99  | 6 | 0.000000 | -1.908479 | -9.582954  |
| 100 | 6 | 0.000000 | -3.103701 | -10.361623 |
| 101 | 6 | 0.000000 | -0.756431 | -10.349808 |
| 102 | 6 | 0.000000 | -3.104847 | -11.747084 |
| 103 | 6 | 0.000000 | -0.757402 | -11.764657 |
| 104 | 6 | 0.000000 | -1.911854 | -12.528545 |
| 105 | 6 | 0.000000 | -0.756473 | -5.926022  |
| 106 | 1 | 0.000000 | -4.066540 | -5.441545  |
| 107 | 1 | 0.000000 | -4.066041 | -7.825963  |
| 108 | 1 | 0.000000 | -4.066143 | -9.861119  |
| 109 | 1 | 0.000000 | -4.068195 | -12.245855 |
| 110 | 6 | 0.000000 | 3.110079  | -16.173915 |
| 111 | 6 | 0.000000 | 1.907417  | -16.925539 |
| 112 | 6 | 0.000000 | 0.753585  | -16.181677 |
| 113 | 6 | 0.000000 | 0.756357  | -14.762482 |
| 114 | 6 | 0.000000 | 3.112537  | -14.785697 |
| 115 | 6 | 0.000000 | 1.914270  | -14.006778 |
| 116 | 6 | 0.000000 | -1.907417 | -16.925539 |
| 117 | 6 | 0.000000 | -0.753585 | -16.181677 |
| 118 | 6 | 0.000000 | -1.914270 | -14.006778 |
| 119 | 6 | 0.000000 | -3.112537 | -14.785697 |
| 120 | 6 | 0.000000 | -3.110079 | -16.173915 |
| 121 | 6 | 0.000000 | -0.756357 | -14.762482 |

|     |   |          |           |            |
|-----|---|----------|-----------|------------|
| 122 | 1 | 0.000000 | -4.073496 | -14.282304 |
| 123 | 1 | 0.000000 | -4.061928 | -16.698266 |
| 124 | 1 | 0.000000 | 4.066041  | -7.825963  |
| 125 | 1 | 0.000000 | 4.066540  | -5.441545  |
| 126 | 1 | 0.000000 | 4.068195  | -12.245855 |
| 127 | 1 | 0.000000 | 4.061928  | -16.698266 |
| 128 | 1 | 0.000000 | 4.073496  | -14.282304 |
| 129 | 6 | 0.000000 | 3.103701  | -10.361623 |
| 130 | 1 | 0.000000 | 4.066143  | -9.861119  |
| 131 | 1 | 0.000000 | 1.923423  | -18.011200 |
| 132 | 1 | 0.000000 | -1.923423 | -18.011200 |

**Table S16.** The optimized Cartesian coordinates of the armchair biphenylene ribbon ( $n \times m = 9 \times 1$ ) calculated at the B3LYP/6-31G(d) level of theory

| Center Number | Atomic Number | Coordinates (Angstroms) |           |           |
|---------------|---------------|-------------------------|-----------|-----------|
|               |               | X                       | Y         | Z         |
| 1             | 6             | 0.000000                | 3.112900  | 16.996652 |
| 2             | 6             | 0.000000                | 1.912389  | 14.739348 |
| 3             | 6             | 0.000000                | 1.914733  | 16.217659 |
| 4             | 6             | 0.000000                | 0.756519  | 16.973333 |
| 5             | 6             | 0.000000                | 0.753664  | 18.392554 |
| 6             | 6             | 0.000000                | 3.110216  | 18.384847 |
| 7             | 6             | 0.000000                | 3.104123  | 12.572601 |
| 8             | 6             | 0.000000                | 0.757598  | 13.975495 |
| 9             | 6             | 0.000000                | 1.909114  | 11.793746 |
| 10            | 6             | 0.000000                | 0.756674  | 12.560453 |
| 11            | 6             | 0.000000                | 1.907510  | 19.136389 |
| 12            | 1             | 0.000000                | 1.923701  | 20.222021 |
| 13            | 6             | 0.000000                | -1.914733 | 16.217659 |
| 14            | 6             | 0.000000                | -0.756519 | 16.973333 |
| 15            | 6             | 0.000000                | -1.907510 | 19.136389 |
| 16            | 6             | 0.000000                | -3.110216 | 18.384847 |
| 17            | 6             | 0.000000                | -3.112900 | 16.996652 |
| 18            | 6             | 0.000000                | -1.912389 | 14.739348 |
| 19            | 6             | 0.000000                | -3.105242 | 13.957939 |
| 20            | 6             | 0.000000                | -0.757598 | 13.975495 |
| 21            | 6             | 0.000000                | -3.104123 | 12.572601 |
| 22            | 6             | 0.000000                | -0.756674 | 12.560453 |
| 23            | 6             | 0.000000                | -1.909114 | 11.793746 |
| 24            | 6             | 0.000000                | -0.753664 | 18.392554 |
| 25            | 1             | 0.000000                | -1.923701 | 20.222021 |
| 26            | 1             | 0.000000                | -4.062014 | 18.909161 |
| 27            | 1             | 0.000000                | -4.073899 | 16.493312 |
| 28            | 1             | 0.000000                | -4.068613 | 14.456636 |
| 29            | 1             | 0.000000                | -4.066525 | 12.072244 |
| 30            | 6             | 0.000000                | 3.103823  | 8.151771  |
| 31            | 6             | 0.000000                | 1.909646  | 7.371135  |
| 32            | 6             | 0.000000                | 0.756696  | 8.136686  |
| 33            | 6             | 0.000000                | 0.756610  | 9.551441  |
| 34            | 6             | 0.000000                | 3.103601  | 9.537048  |
| 35            | 6             | 0.000000                | 1.909191  | 10.317447 |
| 36            | 6             | 0.000000                | -1.909646 | 7.371135  |
| 37            | 6             | 0.000000                | -0.756696 | 8.136686  |
| 38            | 6             | 0.000000                | -1.909191 | 10.317447 |
| 39            | 6             | 0.000000                | -3.103601 | 9.537048  |
| 40            | 6             | 0.000000                | -3.103823 | 8.151771  |
| 41            | 6             | 0.000000                | -0.756610 | 9.551441  |
| 42            | 1             | 0.000000                | -4.066522 | 10.036390 |
| 43            | 1             | 0.000000                | -4.066721 | 7.652286  |
| 44            | 1             | 0.000000                | 4.073899  | 16.493312 |
| 45            | 1             | 0.000000                | 4.062014  | 18.909161 |
| 46            | 1             | 0.000000                | 4.066525  | 12.072244 |
| 47            | 1             | 0.000000                | 4.066721  | 7.652286  |
| 48            | 1             | 0.000000                | 4.066522  | 10.036390 |
| 49            | 6             | 0.000000                | 3.104032  | 5.114698  |
| 50            | 6             | 0.000000                | 1.909744  | 5.895077  |
| 51            | 6             | 0.000000                | 3.104031  | 3.729426  |
| 52            | 6             | 0.000000                | 0.756756  | 5.129380  |
| 53            | 6             | 0.000000                | 1.909721  | 2.949073  |

|     |   |          |           |            |
|-----|---|----------|-----------|------------|
| 54  | 6 | 0.000000 | 0.756709  | 3.714705   |
| 55  | 6 | 0.000000 | -1.909744 | 5.895077   |
| 56  | 6 | 0.000000 | -3.104032 | 5.114698   |
| 57  | 6 | 0.000000 | -0.756756 | 5.129380   |
| 58  | 6 | 0.000000 | -3.104031 | 3.729426   |
| 59  | 6 | 0.000000 | -0.756709 | 3.714705   |
| 60  | 6 | 0.000000 | -1.909721 | 2.949073   |
| 61  | 1 | 0.000000 | -4.066920 | 5.614176   |
| 62  | 1 | 0.000000 | -4.066815 | 3.229742   |
| 63  | 1 | 0.000000 | 4.066920  | 5.614176   |
| 64  | 1 | 0.000000 | 4.066815  | 3.229742   |
| 65  | 6 | 0.000000 | 3.103976  | 0.692648   |
| 66  | 6 | 0.000000 | 1.909726  | 1.473025   |
| 67  | 6 | 0.000000 | 3.103976  | -0.692648  |
| 68  | 6 | 0.000000 | 0.756722  | 0.707327   |
| 69  | 6 | 0.000000 | 1.909726  | -1.473025  |
| 70  | 6 | 0.000000 | 0.756722  | -0.707327  |
| 71  | 6 | 0.000000 | -1.909726 | 1.473025   |
| 72  | 6 | 0.000000 | -3.103976 | 0.692648   |
| 73  | 6 | 0.000000 | -0.756722 | 0.707327   |
| 74  | 6 | 0.000000 | -3.103976 | -0.692648  |
| 75  | 6 | 0.000000 | -0.756722 | -0.707327  |
| 76  | 6 | 0.000000 | -1.909726 | -1.473025  |
| 77  | 1 | 0.000000 | -4.066856 | 1.192147   |
| 78  | 1 | 0.000000 | -4.066856 | -1.192147  |
| 79  | 1 | 0.000000 | 4.066856  | 1.192147   |
| 80  | 1 | 0.000000 | 4.066856  | -1.192147  |
| 81  | 6 | 0.000000 | 3.105242  | 13.957939  |
| 82  | 1 | 0.000000 | 4.068613  | 14.456636  |
| 83  | 6 | 0.000000 | 3.104032  | -5.114698  |
| 84  | 6 | 0.000000 | 1.909646  | -7.371135  |
| 85  | 6 | 0.000000 | 1.909744  | -5.895077  |
| 86  | 6 | 0.000000 | 0.756756  | -5.129380  |
| 87  | 6 | 0.000000 | 0.756709  | -3.714705  |
| 88  | 6 | 0.000000 | 3.104031  | -3.729426  |
| 89  | 6 | 0.000000 | 3.103601  | -9.537048  |
| 90  | 6 | 0.000000 | 0.756696  | -8.136686  |
| 91  | 6 | 0.000000 | 1.909191  | -10.317447 |
| 92  | 6 | 0.000000 | 0.756610  | -9.551441  |
| 93  | 6 | 0.000000 | 1.909721  | -2.949073  |
| 94  | 6 | 0.000000 | -1.909744 | -5.895077  |
| 95  | 6 | 0.000000 | -0.756756 | -5.129380  |
| 96  | 6 | 0.000000 | -1.909721 | -2.949073  |
| 97  | 6 | 0.000000 | -3.104031 | -3.729426  |
| 98  | 6 | 0.000000 | -3.104032 | -5.114698  |
| 99  | 6 | 0.000000 | -1.909646 | -7.371135  |
| 100 | 6 | 0.000000 | -3.103823 | -8.151771  |
| 101 | 6 | 0.000000 | -0.756696 | -8.136686  |
| 102 | 6 | 0.000000 | -3.103601 | -9.537048  |
| 103 | 6 | 0.000000 | -0.756610 | -9.551441  |
| 104 | 6 | 0.000000 | -1.909191 | -10.317447 |
| 105 | 6 | 0.000000 | -0.756709 | -3.714705  |
| 106 | 1 | 0.000000 | -4.066815 | -3.229742  |
| 107 | 1 | 0.000000 | -4.066920 | -5.614176  |
| 108 | 1 | 0.000000 | -4.066721 | -7.652286  |
| 109 | 1 | 0.000000 | -4.066522 | -10.036390 |
| 110 | 6 | 0.000000 | 3.105242  | -13.957939 |
| 111 | 6 | 0.000000 | 1.912389  | -14.739348 |
| 112 | 6 | 0.000000 | 0.757598  | -13.975495 |
| 113 | 6 | 0.000000 | 0.756674  | -12.560453 |
| 114 | 6 | 0.000000 | 3.104123  | -12.572601 |
| 115 | 6 | 0.000000 | 1.909114  | -11.793746 |
| 116 | 6 | 0.000000 | -1.912389 | -14.739348 |
| 117 | 6 | 0.000000 | -0.757598 | -13.975495 |
| 118 | 6 | 0.000000 | -1.909114 | -11.793746 |
| 119 | 6 | 0.000000 | -3.104123 | -12.572601 |
| 120 | 6 | 0.000000 | -3.105242 | -13.957939 |
| 121 | 6 | 0.000000 | -0.756674 | -12.560453 |
| 122 | 1 | 0.000000 | -4.066525 | -12.072244 |
| 123 | 1 | 0.000000 | -4.068613 | -14.456636 |
| 124 | 1 | 0.000000 | 4.066920  | -5.614176  |
| 125 | 1 | 0.000000 | 4.066815  | -3.229742  |
| 126 | 1 | 0.000000 | 4.066522  | -10.036390 |
| 127 | 1 | 0.000000 | 4.068613  | -14.456636 |
| 128 | 1 | 0.000000 | 4.066525  | -12.072244 |
| 129 | 6 | 0.000000 | 3.112900  | -16.996652 |
| 130 | 6 | 0.000000 | 1.914733  | -16.217659 |
| 131 | 6 | 0.000000 | 3.110216  | -18.384847 |
| 132 | 6 | 0.000000 | 0.756519  | -16.973333 |

|     |   |          |           |            |
|-----|---|----------|-----------|------------|
| 133 | 6 | 0.000000 | 1.907510  | -19.136389 |
| 134 | 6 | 0.000000 | 0.753664  | -18.392554 |
| 135 | 6 | 0.000000 | -1.914733 | -16.217659 |
| 136 | 6 | 0.000000 | -3.112900 | -16.996652 |
| 137 | 6 | 0.000000 | -0.756519 | -16.973333 |
| 138 | 6 | 0.000000 | -3.110216 | -18.384847 |
| 139 | 6 | 0.000000 | -0.753664 | -18.392554 |
| 140 | 6 | 0.000000 | -1.907510 | -19.136389 |
| 141 | 1 | 0.000000 | -4.073899 | -16.493312 |
| 142 | 1 | 0.000000 | -4.062014 | -18.909161 |
| 143 | 1 | 0.000000 | 4.073899  | -16.493312 |
| 144 | 1 | 0.000000 | 4.062014  | -18.909161 |
| 145 | 6 | 0.000000 | 3.103823  | -8.151771  |
| 146 | 1 | 0.000000 | 4.066721  | -7.652286  |
| 147 | 1 | 0.000000 | 1.923701  | -20.222021 |
| 148 | 1 | 0.000000 | -1.923701 | -20.222021 |

**Table S17.** The optimized Cartesian coordinates of the armchair biphenylene ribbon ( $n \times m = 10 \times 1$ ) calculated at the B3LYP/6-31G(d) level of theory

| Center Number | Atomic Number | Coordinates (Angstroms) |           |           |
|---------------|---------------|-------------------------|-----------|-----------|
|               |               | X                       | Y         | Z         |
| 1             | 6             | 0.000000                | 3.112893  | 19.208560 |
| 2             | 6             | 0.000000                | 1.912426  | 16.950923 |
| 3             | 6             | 0.000000                | 1.914758  | 18.429349 |
| 4             | 6             | 0.000000                | 0.756457  | 19.184904 |
| 5             | 6             | 0.000000                | 0.753625  | 20.604282 |
| 6             | 6             | 0.000000                | 3.110159  | 20.596683 |
| 7             | 6             | 0.000000                | 3.104047  | 14.784037 |
| 8             | 6             | 0.000000                | 0.757533  | 16.187197 |
| 9             | 6             | 0.000000                | 1.909021  | 14.005403 |
| 10            | 6             | 0.000000                | 0.756597  | 14.772043 |
| 11            | 6             | 0.000000                | 1.907458  | 21.348140 |
| 12            | 1             | 0.000000                | 1.923315  | 22.433774 |
| 13            | 6             | 0.000000                | -1.914758 | 18.429349 |
| 14            | 6             | 0.000000                | -0.756457 | 19.184904 |
| 15            | 6             | 0.000000                | -1.907458 | 21.348140 |
| 16            | 6             | 0.000000                | -3.110159 | 20.596683 |
| 17            | 6             | 0.000000                | -3.112893 | 19.208560 |
| 18            | 6             | 0.000000                | -1.912426 | 16.950923 |
| 19            | 6             | 0.000000                | -3.105280 | 16.169309 |
| 20            | 6             | 0.000000                | -0.757533 | 16.187197 |
| 21            | 6             | 0.000000                | -3.104047 | 14.784037 |
| 22            | 6             | 0.000000                | -0.756597 | 14.772043 |
| 23            | 6             | 0.000000                | -1.909021 | 14.005403 |
| 24            | 6             | 0.000000                | -0.753625 | 20.604282 |
| 25            | 1             | 0.000000                | -1.923315 | 22.433774 |
| 26            | 1             | 0.000000                | -4.061865 | 21.121166 |
| 27            | 1             | 0.000000                | -4.073825 | 18.705188 |
| 28            | 1             | 0.000000                | -4.068531 | 16.668157 |
| 29            | 1             | 0.000000                | -4.066332 | 14.283433 |
| 30            | 6             | 0.000000                | 3.103813  | 10.363411 |
| 31            | 6             | 0.000000                | 1.909665  | 9.582648  |
| 32            | 6             | 0.000000                | 0.756669  | 10.348186 |
| 33            | 6             | 0.000000                | 0.756511  | 11.763102 |
| 34            | 6             | 0.000000                | 3.103443  | 11.748683 |
| 35            | 6             | 0.000000                | 1.909038  | 12.529101 |
| 36            | 6             | 0.000000                | -1.909665 | 9.582648  |
| 37            | 6             | 0.000000                | -0.756669 | 10.348186 |
| 38            | 6             | 0.000000                | -1.909038 | 12.529101 |
| 39            | 6             | 0.000000                | -3.103443 | 11.748683 |
| 40            | 6             | 0.000000                | -3.103813 | 10.363411 |
| 41            | 6             | 0.000000                | -0.756511 | 11.763102 |
| 42            | 1             | 0.000000                | -4.066200 | 12.248332 |
| 43            | 1             | 0.000000                | -4.066756 | 9.863994  |
| 44            | 1             | 0.000000                | 4.073825  | 18.705188 |
| 45            | 1             | 0.000000                | 4.061865  | 21.121166 |
| 46            | 1             | 0.000000                | 4.066332  | 14.283433 |
| 47            | 1             | 0.000000                | 4.066756  | 9.863994  |
| 48            | 1             | 0.000000                | 4.066200  | 12.248332 |
| 49            | 6             | 0.000000                | 3.103963  | 7.325837  |

|     |   |          |           |            |
|-----|---|----------|-----------|------------|
| 50  | 6 | 0.000000 | 1.909652  | 8.106450   |
| 51  | 6 | 0.000000 | 3.103770  | 5.940585   |
| 52  | 6 | 0.000000 | 0.756676  | 7.340722   |
| 53  | 6 | 0.000000 | 1.909424  | 5.160299   |
| 54  | 6 | 0.000000 | 0.756637  | 5.925919   |
| 55  | 6 | 0.000000 | -1.909652 | 8.106450   |
| 56  | 6 | 0.000000 | -3.103963 | 7.325837   |
| 57  | 6 | 0.000000 | -0.756676 | 7.340722   |
| 58  | 6 | 0.000000 | -3.103770 | 5.940585   |
| 59  | 6 | 0.000000 | -0.756637 | 5.925919   |
| 60  | 6 | 0.000000 | -1.909424 | 5.160299   |
| 61  | 1 | 0.000000 | -4.066787 | 7.825482   |
| 62  | 1 | 0.000000 | -4.066480 | 5.440839   |
| 63  | 1 | 0.000000 | 4.066787  | 7.825482   |
| 64  | 1 | 0.000000 | 4.066480  | 5.440839   |
| 65  | 6 | 0.000000 | 3.103768  | 2.904060   |
| 66  | 6 | 0.000000 | 1.909491  | 3.684319   |
| 67  | 6 | 0.000000 | 3.104008  | 1.518772   |
| 68  | 6 | 0.000000 | 0.756699  | 2.918623   |
| 69  | 6 | 0.000000 | 1.909760  | 0.738131   |
| 70  | 6 | 0.000000 | 0.756653  | 1.503835   |
| 71  | 6 | 0.000000 | -1.909491 | 3.684319   |
| 72  | 6 | 0.000000 | -3.103768 | 2.904060   |
| 73  | 6 | 0.000000 | -0.756699 | 2.918623   |
| 74  | 6 | 0.000000 | -3.104008 | 1.518772   |
| 75  | 6 | 0.000000 | -0.756653 | 1.503835   |
| 76  | 6 | 0.000000 | -1.909760 | 0.738131   |
| 77  | 1 | 0.000000 | -4.066522 | 3.403711   |
| 78  | 1 | 0.000000 | -4.066873 | 1.019200   |
| 79  | 1 | 0.000000 | 4.066522  | 3.403711   |
| 80  | 1 | 0.000000 | 4.066873  | 1.019200   |
| 81  | 6 | 0.000000 | 3.105280  | 16.169309  |
| 82  | 1 | 0.000000 | 4.068531  | 16.668157  |
| 83  | 6 | 0.000000 | 3.103768  | -2.904060  |
| 84  | 6 | 0.000000 | 1.909424  | -5.160299  |
| 85  | 6 | 0.000000 | 1.909491  | -3.684319  |
| 86  | 6 | 0.000000 | 0.756699  | -2.918623  |
| 87  | 6 | 0.000000 | 0.756653  | -1.503835  |
| 88  | 6 | 0.000000 | 3.104008  | -1.518772  |
| 89  | 6 | 0.000000 | 3.103963  | -7.325837  |
| 90  | 6 | 0.000000 | 0.756637  | -5.925919  |
| 91  | 6 | 0.000000 | 1.909652  | -8.106450  |
| 92  | 6 | 0.000000 | 0.756676  | -7.340722  |
| 93  | 6 | 0.000000 | 1.909760  | -0.738131  |
| 94  | 6 | 0.000000 | -1.909491 | -3.684319  |
| 95  | 6 | 0.000000 | -0.756699 | -2.918623  |
| 96  | 6 | 0.000000 | -1.909760 | -0.738131  |
| 97  | 6 | 0.000000 | -3.104008 | -1.518772  |
| 98  | 6 | 0.000000 | -3.103768 | -2.904060  |
| 99  | 6 | 0.000000 | -1.909424 | -5.160299  |
| 100 | 6 | 0.000000 | -3.103770 | -5.940585  |
| 101 | 6 | 0.000000 | -0.756637 | -5.925919  |
| 102 | 6 | 0.000000 | -3.103963 | -7.325837  |
| 103 | 6 | 0.000000 | -0.756676 | -7.340722  |
| 104 | 6 | 0.000000 | -1.909652 | -8.106450  |
| 105 | 6 | 0.000000 | -0.756653 | -1.503835  |
| 106 | 1 | 0.000000 | -4.066873 | -1.019200  |
| 107 | 1 | 0.000000 | -4.066522 | -3.403711  |
| 108 | 1 | 0.000000 | -4.066480 | -5.440839  |
| 109 | 1 | 0.000000 | -4.066787 | -7.825482  |
| 110 | 6 | 0.000000 | 3.103443  | -11.748683 |
| 111 | 6 | 0.000000 | 1.909038  | -12.529101 |
| 112 | 6 | 0.000000 | 0.756511  | -11.763102 |
| 113 | 6 | 0.000000 | 0.756669  | -10.348186 |
| 114 | 6 | 0.000000 | 3.103813  | -10.363411 |
| 115 | 6 | 0.000000 | 1.909665  | -9.582648  |
| 116 | 6 | 0.000000 | -1.909038 | -12.529101 |
| 117 | 6 | 0.000000 | -0.756511 | -11.763102 |
| 118 | 6 | 0.000000 | -1.909665 | -9.582648  |
| 119 | 6 | 0.000000 | -3.103813 | -10.363411 |
| 120 | 6 | 0.000000 | -3.103443 | -11.748683 |
| 121 | 6 | 0.000000 | -0.756669 | -10.348186 |
| 122 | 1 | 0.000000 | -4.066756 | -9.863994  |
| 123 | 1 | 0.000000 | -4.066200 | -12.248332 |
| 124 | 1 | 0.000000 | 4.066522  | -3.403711  |
| 125 | 1 | 0.000000 | 4.066873  | -1.019200  |
| 126 | 1 | 0.000000 | 4.066787  | -7.825482  |
| 127 | 1 | 0.000000 | 4.066200  | -12.248332 |
| 128 | 1 | 0.000000 | 4.066756  | -9.863994  |



|     |   |          |           |            |
|-----|---|----------|-----------|------------|
| 129 | 6 | 0.000000 | 3.104047  | -14.784037 |
| 130 | 6 | 0.000000 | 1.909021  | -14.005403 |
| 131 | 6 | 0.000000 | 3.105280  | -16.169309 |
| 132 | 6 | 0.000000 | 0.756597  | -14.772043 |
| 133 | 6 | 0.000000 | 1.912426  | -16.950923 |
| 134 | 6 | 0.000000 | 0.757533  | -16.187197 |
| 135 | 6 | 0.000000 | -1.909021 | -14.005403 |
| 136 | 6 | 0.000000 | -3.104047 | -14.784037 |
| 137 | 6 | 0.000000 | -0.756597 | -14.772043 |
| 138 | 6 | 0.000000 | -3.105280 | -16.169309 |
| 139 | 6 | 0.000000 | -0.757533 | -16.187197 |
| 140 | 6 | 0.000000 | -1.912426 | -16.950923 |
| 141 | 1 | 0.000000 | -4.066332 | -14.283433 |
| 142 | 1 | 0.000000 | -4.068531 | -16.668157 |
| 143 | 1 | 0.000000 | 4.066332  | -14.283433 |
| 144 | 1 | 0.000000 | 4.068531  | -16.668157 |
| 145 | 6 | 0.000000 | 3.112893  | -19.208560 |
| 146 | 6 | 0.000000 | 1.914758  | -18.429349 |
| 147 | 6 | 0.000000 | 3.110159  | -20.596683 |
| 148 | 6 | 0.000000 | 0.756457  | -19.184904 |
| 149 | 6 | 0.000000 | 1.907458  | -21.348140 |
| 150 | 6 | 0.000000 | 0.753625  | -20.604282 |
| 151 | 6 | 0.000000 | -1.914758 | -18.429349 |
| 152 | 6 | 0.000000 | -3.112893 | -19.208560 |
| 153 | 6 | 0.000000 | -0.756457 | -19.184904 |
| 154 | 6 | 0.000000 | -3.110159 | -20.596683 |
| 155 | 6 | 0.000000 | -0.753625 | -20.604282 |
| 156 | 6 | 0.000000 | -1.907458 | -21.348140 |
| 157 | 1 | 0.000000 | 1.923315  | -22.433774 |
| 158 | 1 | 0.000000 | -4.073825 | -18.705188 |
| 159 | 1 | 0.000000 | -4.061865 | -21.121166 |
| 160 | 1 | 0.000000 | -1.923315 | -22.433774 |
| 161 | 1 | 0.000000 | 4.073825  | -18.705188 |
| 162 | 1 | 0.000000 | 4.061865  | -21.121166 |
| 163 | 6 | 0.000000 | 3.103770  | -5.940585  |
| 164 | 1 | 0.000000 | 4.066480  | -5.440839  |

**Table S18.** The optimized Cartesian coordinates of the zigzag biphenylene ribbon ( $n \times m = 2 \times 2$ ) calculated at the B3LYP/6-31G(d) level of theory

| Center Number | Atomic Number | Coordinates (Angstroms) |           |           |
|---------------|---------------|-------------------------|-----------|-----------|
|               |               | X                       | Y         | Z         |
| 1             | 6             | 0.000000                | 0.733252  | 1.898606  |
| 2             | 6             | 0.000000                | -0.733252 | 1.898606  |
| 3             | 6             | 0.000000                | -1.522108 | 3.060826  |
| 4             | 6             | 0.000000                | -2.934733 | 3.066187  |
| 5             | 6             | 0.000000                | 1.522108  | 3.060826  |
| 6             | 6             | 0.000000                | 3.725214  | 1.912190  |
| 7             | 6             | 0.000000                | 2.934733  | 3.066187  |
| 8             | 6             | 0.000000                | -3.725214 | 1.912190  |
| 9             | 6             | 0.000000                | -0.740123 | 5.720383  |
| 10            | 6             | 0.000000                | -1.505988 | 4.570795  |
| 11            | 6             | 0.000000                | -3.665448 | 5.729260  |
| 12            | 6             | 0.000000                | -2.902506 | 6.931984  |
| 13            | 6             | 0.000000                | -1.518732 | 6.927074  |
| 14            | 6             | 0.000000                | 0.740123  | 5.720383  |
| 15            | 6             | 0.000000                | 1.518732  | 6.927074  |
| 16            | 6             | 0.000000                | 1.505988  | 4.570795  |
| 17            | 6             | 0.000000                | 2.902506  | 6.931984  |
| 18            | 6             | 0.000000                | 2.929163  | 4.575451  |
| 19            | 6             | 0.000000                | 3.665448  | 5.729260  |
| 20            | 6             | 0.000000                | -2.929163 | 4.575451  |
| 21            | 1             | 0.000000                | 4.810201  | 1.920348  |
| 22            | 1             | 0.000000                | -3.423476 | 7.885483  |
| 23            | 1             | 0.000000                | -1.010241 | 7.884837  |
| 24            | 1             | 0.000000                | 1.010241  | 7.884837  |
| 25            | 1             | 0.000000                | 3.423476  | 7.885483  |
| 26            | 1             | 0.000000                | 4.750758  | 5.754211  |
| 27            | 6             | 0.000000                | -0.733252 | -1.898606 |
| 28            | 6             | 0.000000                | -1.522108 | -3.060826 |

|    |   |          |           |           |
|----|---|----------|-----------|-----------|
| 29 | 6 | 0.000000 | -3.725214 | -1.912190 |
| 30 | 6 | 0.000000 | -2.952104 | -0.756114 |
| 31 | 6 | 0.000000 | -1.532696 | -0.752726 |
| 32 | 6 | 0.000000 | 0.733252  | -1.898606 |
| 33 | 6 | 0.000000 | -1.532696 | 0.752726  |
| 34 | 6 | 0.000000 | 1.532696  | -0.752726 |
| 35 | 6 | 0.000000 | 1.532696  | 0.752726  |
| 36 | 6 | 0.000000 | -2.952104 | 0.756114  |
| 37 | 6 | 0.000000 | 1.522108  | -3.060826 |
| 38 | 6 | 0.000000 | 2.952104  | 0.756114  |
| 39 | 6 | 0.000000 | 2.952104  | -0.756114 |
| 40 | 6 | 0.000000 | 2.934733  | -3.066187 |
| 41 | 6 | 0.000000 | 3.725214  | -1.912190 |
| 42 | 6 | 0.000000 | -2.934733 | -3.066187 |
| 43 | 1 | 0.000000 | 4.810201  | -1.920348 |
| 44 | 6 | 0.000000 | -0.740123 | -5.720383 |
| 45 | 6 | 0.000000 | -1.518732 | -6.927074 |
| 46 | 6 | 0.000000 | -3.665448 | -5.729260 |
| 47 | 6 | 0.000000 | -2.929163 | -4.575451 |
| 48 | 6 | 0.000000 | -1.505988 | -4.570795 |
| 49 | 6 | 0.000000 | 0.740123  | -5.720383 |
| 50 | 6 | 0.000000 | 1.505988  | -4.570795 |
| 51 | 6 | 0.000000 | 1.518732  | -6.927074 |
| 52 | 6 | 0.000000 | 2.929163  | -4.575451 |
| 53 | 6 | 0.000000 | 2.902506  | -6.931984 |
| 54 | 6 | 0.000000 | 3.665448  | -5.729260 |
| 55 | 1 | 0.000000 | 3.423476  | -7.885483 |
| 56 | 1 | 0.000000 | -1.010241 | -7.884837 |
| 57 | 1 | 0.000000 | 1.010241  | -7.884837 |
| 58 | 6 | 0.000000 | -2.902506 | -6.931984 |
| 59 | 1 | 0.000000 | -3.423476 | -7.885483 |
| 60 | 1 | 0.000000 | 4.750758  | -5.754211 |
| 61 | 1 | 0.000000 | -4.810201 | 1.920348  |
| 62 | 1 | 0.000000 | -4.750758 | 5.754211  |
| 63 | 1 | 0.000000 | -4.810201 | -1.920348 |
| 64 | 1 | 0.000000 | -4.750758 | -5.754211 |

**Table S19.** The optimized Cartesian coordinates of the zigzag biphenylene ribbon ( $n \times m = 2 \times 3$ ) calculated at the B3LYP/6-31G(d) level of theory

| Center Number | Atomic Number | Coordinates (Angstroms) |           |           |
|---------------|---------------|-------------------------|-----------|-----------|
|               |               | X                       | Y         | Z         |
| 1             | 6             | 0.000000                | 1.530223  | 4.568494  |
| 2             | 6             | 0.000000                | 2.902901  | 10.748827 |
| 3             | 6             | 0.000000                | 3.665282  | 9.545950  |
| 4             | 6             | 0.000000                | 1.519117  | 10.744256 |
| 5             | 6             | 0.000000                | 0.739808  | 9.537888  |
| 6             | 6             | 0.000000                | 1.505391  | 8.387546  |
| 7             | 6             | 0.000000                | 2.928737  | 8.392254  |
| 8             | 6             | 0.000000                | 2.933691  | 6.883131  |
| 9             | 6             | 0.000000                | 1.521744  | 6.877950  |
| 10            | 6             | 0.000000                | 0.732224  | 5.714313  |
| 11            | 6             | 0.000000                | 2.950290  | 4.573341  |
| 12            | 6             | 0.000000                | 3.723717  | 5.727664  |
| 13            | 1             | 0.000000                | 4.750750  | 9.569338  |
| 14            | 1             | 0.000000                | 3.423325  | 11.702798 |
| 15            | 1             | 0.000000                | 1.011073  | 11.702425 |
| 16            | 6             | 0.000000                | -0.739808 | 9.537888  |
| 17            | 6             | 0.000000                | -1.505391 | 8.387546  |
| 18            | 6             | 0.000000                | -1.521744 | 6.877950  |
| 19            | 6             | 0.000000                | -0.732224 | 5.714313  |
| 20            | 6             | 0.000000                | -1.530223 | 4.568494  |
| 21            | 6             | 0.000000                | -3.723717 | 5.727664  |
| 22            | 6             | 0.000000                | -2.933691 | 6.883131  |
| 23            | 6             | 0.000000                | -2.928737 | 8.392254  |
| 24            | 6             | 0.000000                | -3.665282 | 9.545950  |
| 25            | 6             | 0.000000                | -2.902901 | 10.748827 |
| 26            | 6             | 0.000000                | -1.519117 | 10.744256 |
| 27            | 1             | 0.000000                | -3.423325 | 11.702798 |
| 28            | 1             | 0.000000                | -1.011073 | 11.702425 |

|    |   |          |           |            |
|----|---|----------|-----------|------------|
| 29 | 1 | 0.000000 | 4.808805  | 5.734963   |
| 30 | 1 | 0.000000 | -4.750750 | 9.569338   |
| 31 | 6 | 0.000000 | 2.949077  | 3.062346   |
| 32 | 6 | 0.000000 | 1.533520  | 3.061853   |
| 33 | 6 | 0.000000 | 0.733880  | 1.907263   |
| 34 | 6 | 0.000000 | 1.531592  | 0.754084   |
| 35 | 6 | 0.000000 | 2.948695  | 0.754938   |
| 36 | 6 | 0.000000 | 3.731559  | 1.907254   |
| 37 | 6 | 0.000000 | -1.533520 | 3.061853   |
| 38 | 6 | 0.000000 | -0.733880 | 1.907263   |
| 39 | 6 | 0.000000 | -1.531592 | 0.754084   |
| 40 | 6 | 0.000000 | -2.948695 | 0.754938   |
| 41 | 6 | 0.000000 | -3.731559 | 1.907254   |
| 42 | 6 | 0.000000 | -2.949077 | 3.062346   |
| 43 | 6 | 0.000000 | -2.950290 | 4.573341   |
| 44 | 1 | 0.000000 | 4.816575  | 1.906760   |
| 45 | 1 | 0.000000 | -4.816575 | 1.906760   |
| 46 | 1 | 0.000000 | -4.808805 | 5.734963   |
| 47 | 6 | 0.000000 | 1.521744  | -6.877950  |
| 48 | 6 | 0.000000 | 2.948695  | -0.754938  |
| 49 | 6 | 0.000000 | 3.731559  | -1.907254  |
| 50 | 6 | 0.000000 | 1.531592  | -0.754084  |
| 51 | 6 | 0.000000 | 0.733880  | -1.907263  |
| 52 | 6 | 0.000000 | 1.533520  | -3.061853  |
| 53 | 6 | 0.000000 | 2.949077  | -3.062346  |
| 54 | 6 | 0.000000 | 2.950290  | -4.573341  |
| 55 | 6 | 0.000000 | 1.530223  | -4.568494  |
| 56 | 6 | 0.000000 | 0.732224  | -5.714313  |
| 57 | 6 | 0.000000 | 2.933691  | -6.883131  |
| 58 | 6 | 0.000000 | 3.723717  | -5.727664  |
| 59 | 1 | 0.000000 | 4.816575  | -1.906760  |
| 60 | 6 | 0.000000 | -0.733880 | -1.907263  |
| 61 | 6 | 0.000000 | -1.533520 | -3.061853  |
| 62 | 6 | 0.000000 | -1.530223 | -4.568494  |
| 63 | 6 | 0.000000 | -0.732224 | -5.714313  |
| 64 | 6 | 0.000000 | -1.521744 | -6.877950  |
| 65 | 6 | 0.000000 | -3.723717 | -5.727664  |
| 66 | 6 | 0.000000 | -2.950290 | -4.573341  |
| 67 | 6 | 0.000000 | -2.949077 | -3.062346  |
| 68 | 6 | 0.000000 | -3.731559 | -1.907254  |
| 69 | 6 | 0.000000 | -2.948695 | -0.754938  |
| 70 | 6 | 0.000000 | -1.531592 | -0.754084  |
| 71 | 1 | 0.000000 | 4.808805  | -5.734963  |
| 72 | 1 | 0.000000 | -4.816575 | -1.906760  |
| 73 | 6 | 0.000000 | -2.933691 | -6.883131  |
| 74 | 1 | 0.000000 | -4.808805 | -5.734963  |
| 75 | 6 | 0.000000 | 2.928737  | -8.392254  |
| 76 | 6 | 0.000000 | 3.665282  | -9.545950  |
| 77 | 6 | 0.000000 | 1.505391  | -8.387546  |
| 78 | 6 | 0.000000 | 0.739808  | -9.537888  |
| 79 | 6 | 0.000000 | 1.519117  | -10.744256 |
| 80 | 6 | 0.000000 | 2.902901  | -10.748827 |
| 81 | 1 | 0.000000 | 4.750750  | -9.569338  |
| 82 | 6 | 0.000000 | -0.739808 | -9.537888  |
| 83 | 6 | 0.000000 | -1.519117 | -10.744256 |
| 84 | 6 | 0.000000 | -2.902901 | -10.748827 |
| 85 | 6 | 0.000000 | -3.665282 | -9.545950  |
| 86 | 6 | 0.000000 | -2.928737 | -8.392254  |
| 87 | 6 | 0.000000 | -1.505391 | -8.387546  |
| 88 | 1 | 0.000000 | -4.750750 | -9.569338  |
| 89 | 1 | 0.000000 | 1.011073  | -11.702425 |
| 90 | 1 | 0.000000 | 3.423325  | -11.702798 |
| 91 | 1 | 0.000000 | -1.011073 | -11.702425 |
| 92 | 1 | 0.000000 | -3.423325 | -11.702798 |

**Table S20.** The optimized Cartesian coordinates of the zigzag biphenylene ribbon ( $n \times m = 2 \times 4$ ) calculated at the B3LYP/6-31G(d) level of theory

| Center Number | Atomic Number | Coordinates (Angstroms) |          |           |
|---------------|---------------|-------------------------|----------|-----------|
|               |               | X                       | Y        | Z         |
| 1             | 6             | 0.000000                | 1.530167 | 8.385273  |
| 2             | 6             | 0.000000                | 2.902542 | 14.565867 |
| 3             | 6             | 0.000000                | 3.665285 | 13.362772 |

|    |   |          |           |            |
|----|---|----------|-----------|------------|
| 4  | 6 | 0.000000 | 1.518966  | 14.561202  |
| 5  | 6 | 0.000000 | 0.739664  | 13.354503  |
| 6  | 6 | 0.000000 | 1.505387  | 12.204388  |
| 7  | 6 | 0.000000 | 2.928852  | 12.209186  |
| 8  | 6 | 0.000000 | 2.933470  | 10.699933  |
| 9  | 6 | 0.000000 | 1.521976  | 10.694784  |
| 10 | 6 | 0.000000 | 0.732034  | 9.530729   |
| 11 | 6 | 0.000000 | 2.950536  | 8.390175   |
| 12 | 6 | 0.000000 | 3.723936  | 9.544201   |
| 13 | 1 | 0.000000 | 4.750726  | 13.386508  |
| 14 | 1 | 0.000000 | 3.423051  | 15.519818  |
| 15 | 1 | 0.000000 | 1.010816  | 15.519393  |
| 16 | 6 | 0.000000 | -0.739664 | 13.354503  |
| 17 | 6 | 0.000000 | -1.505387 | 12.204388  |
| 18 | 6 | 0.000000 | -1.521976 | 10.694784  |
| 19 | 6 | 0.000000 | -0.732034 | 9.530729   |
| 20 | 6 | 0.000000 | -1.530167 | 8.385273   |
| 21 | 6 | 0.000000 | -3.723936 | 9.544201   |
| 22 | 6 | 0.000000 | -2.933470 | 10.699933  |
| 23 | 6 | 0.000000 | -2.928852 | 12.209186  |
| 24 | 6 | 0.000000 | -3.665285 | 13.362772  |
| 25 | 6 | 0.000000 | -2.902542 | 14.565867  |
| 26 | 6 | 0.000000 | -1.518966 | 14.561202  |
| 27 | 1 | 0.000000 | -3.423051 | 15.519818  |
| 28 | 1 | 0.000000 | -1.010816 | 15.519393  |
| 29 | 1 | 0.000000 | 4.808991  | 9.551625   |
| 30 | 1 | 0.000000 | -4.750726 | 13.386508  |
| 31 | 6 | 0.000000 | 2.948772  | 6.879082   |
| 32 | 6 | 0.000000 | 1.533884  | 6.878691   |
| 33 | 6 | 0.000000 | 0.733518  | 5.723584   |
| 34 | 6 | 0.000000 | 1.531199  | 4.570821   |
| 35 | 6 | 0.000000 | 2.948725  | 4.571770   |
| 36 | 6 | 0.000000 | 3.731658  | 5.723406   |
| 37 | 6 | 0.000000 | -1.533884 | 6.878691   |
| 38 | 6 | 0.000000 | -0.733518 | 5.723584   |
| 39 | 6 | 0.000000 | -1.531199 | 4.570821   |
| 40 | 6 | 0.000000 | -2.948725 | 4.571770   |
| 41 | 6 | 0.000000 | -3.731658 | 5.723406   |
| 42 | 6 | 0.000000 | -2.948772 | 6.879082   |
| 43 | 6 | 0.000000 | -2.950536 | 8.390175   |
| 44 | 1 | 0.000000 | 4.816616  | 5.722859   |
| 45 | 1 | 0.000000 | -4.816616 | 5.722859   |
| 46 | 1 | 0.000000 | -4.808991 | 9.551625   |
| 47 | 6 | 0.000000 | 1.531893  | -3.062730  |
| 48 | 6 | 0.000000 | 2.947417  | 3.061736   |
| 49 | 6 | 0.000000 | 3.730570  | 1.907882   |
| 50 | 6 | 0.000000 | 1.531893  | 3.062730   |
| 51 | 6 | 0.000000 | 0.732966  | 1.908118   |
| 52 | 6 | 0.000000 | 1.531258  | 0.754067   |
| 53 | 6 | 0.000000 | 2.947529  | 0.754957   |
| 54 | 6 | 0.000000 | 2.947529  | -0.754957  |
| 55 | 6 | 0.000000 | 1.531258  | -0.754067  |
| 56 | 6 | 0.000000 | 0.732966  | -1.908118  |
| 57 | 6 | 0.000000 | 2.947417  | -3.061736  |
| 58 | 6 | 0.000000 | 3.730570  | -1.907882  |
| 59 | 1 | 0.000000 | 4.815497  | 1.907852   |
| 60 | 6 | 0.000000 | -0.732966 | 1.908118   |
| 61 | 6 | 0.000000 | -1.531258 | 0.754067   |
| 62 | 6 | 0.000000 | -1.531258 | -0.754067  |
| 63 | 6 | 0.000000 | -0.732966 | -1.908118  |
| 64 | 6 | 0.000000 | -1.531893 | -3.062730  |
| 65 | 6 | 0.000000 | -3.730570 | -1.907882  |
| 66 | 6 | 0.000000 | -2.947529 | -0.754957  |
| 67 | 6 | 0.000000 | -2.947529 | 0.754957   |
| 68 | 6 | 0.000000 | -3.730570 | 1.907882   |
| 69 | 6 | 0.000000 | -2.947417 | 3.061736   |
| 70 | 6 | 0.000000 | -1.531893 | 3.062730   |
| 71 | 1 | 0.000000 | 4.815497  | -1.907852  |
| 72 | 1 | 0.000000 | -4.815497 | 1.907852   |
| 73 | 6 | 0.000000 | -2.947417 | -3.061736  |
| 74 | 1 | 0.000000 | -4.815497 | -1.907852  |
| 75 | 6 | 0.000000 | 1.521976  | -10.694784 |
| 76 | 6 | 0.000000 | 2.948725  | -4.571770  |
| 77 | 6 | 0.000000 | 3.731658  | -5.723406  |
| 78 | 6 | 0.000000 | 1.531199  | -4.570821  |
| 79 | 6 | 0.000000 | 0.733518  | -5.723584  |
| 80 | 6 | 0.000000 | 1.533884  | -6.878691  |
| 81 | 6 | 0.000000 | 2.948772  | -6.879082  |
| 82 | 6 | 0.000000 | 2.950536  | -8.390175  |

|     |   |          |           |            |
|-----|---|----------|-----------|------------|
| 83  | 6 | 0.000000 | 1.530167  | -8.385273  |
| 84  | 6 | 0.000000 | 0.732034  | -9.530729  |
| 85  | 6 | 0.000000 | 2.933470  | -10.699933 |
| 86  | 6 | 0.000000 | 3.723936  | -9.544201  |
| 87  | 1 | 0.000000 | 4.816616  | -5.722859  |
| 88  | 6 | 0.000000 | -0.733518 | -5.723584  |
| 89  | 6 | 0.000000 | -1.533884 | -6.878691  |
| 90  | 6 | 0.000000 | -1.530167 | -8.385273  |
| 91  | 6 | 0.000000 | -0.732034 | -9.530729  |
| 92  | 6 | 0.000000 | -1.521976 | -10.694784 |
| 93  | 6 | 0.000000 | -3.723936 | -9.544201  |
| 94  | 6 | 0.000000 | -2.950536 | -8.390175  |
| 95  | 6 | 0.000000 | -2.948772 | -6.879082  |
| 96  | 6 | 0.000000 | -3.731658 | -5.723406  |
| 97  | 6 | 0.000000 | -2.948725 | -4.571770  |
| 98  | 6 | 0.000000 | -1.531199 | -4.570821  |
| 99  | 1 | 0.000000 | 4.808991  | -9.551625  |
| 100 | 1 | 0.000000 | -4.816616 | -5.722859  |
| 101 | 6 | 0.000000 | 2.928852  | -12.209186 |
| 102 | 6 | 0.000000 | 1.505387  | -12.204388 |
| 103 | 6 | 0.000000 | 0.739664  | -13.354503 |
| 104 | 6 | 0.000000 | 1.518966  | -14.561202 |
| 105 | 6 | 0.000000 | 2.902542  | -14.565867 |
| 106 | 6 | 0.000000 | 3.665285  | -13.362772 |
| 107 | 6 | 0.000000 | -1.505387 | -12.204388 |
| 108 | 6 | 0.000000 | -0.739664 | -13.354503 |
| 109 | 6 | 0.000000 | -1.518966 | -14.561202 |
| 110 | 6 | 0.000000 | -2.902542 | -14.565867 |
| 111 | 6 | 0.000000 | -3.665285 | -13.362772 |
| 112 | 6 | 0.000000 | -2.928852 | -12.209186 |
| 113 | 6 | 0.000000 | -2.933470 | -10.699933 |
| 114 | 1 | 0.000000 | 4.750726  | -13.386508 |
| 115 | 1 | 0.000000 | -4.750726 | -13.386508 |
| 116 | 1 | 0.000000 | -4.808991 | -9.551625  |
| 117 | 1 | 0.000000 | 1.010816  | -15.519393 |
| 118 | 1 | 0.000000 | 3.423051  | -15.519818 |
| 119 | 1 | 0.000000 | -1.010816 | -15.519393 |
| 120 | 1 | 0.000000 | -3.423051 | -15.519818 |

**Table S21.** The optimized Cartesian coordinates of the zigzag biphenylene ribbon ( $n \times m = 2 \times 5$ ) calculated at the B3LYP/6-31G(d) level of theory

| Center Number | Atomic Number | Coordinates (Angstroms) |           |           |
|---------------|---------------|-------------------------|-----------|-----------|
|               |               | X                       | Y         | Z         |
| 1             | 6             | 0.000000                | 1.530110  | 12.201819 |
| 2             | 6             | 0.000000                | 2.902556  | 18.382457 |
| 3             | 6             | 0.000000                | 3.665342  | 17.179268 |
| 4             | 6             | 0.000000                | 1.519075  | 18.377808 |
| 5             | 6             | 0.000000                | 0.739659  | 17.171026 |
| 6             | 6             | 0.000000                | 1.505373  | 16.020920 |
| 7             | 6             | 0.000000                | 2.928950  | 16.025744 |
| 8             | 6             | 0.000000                | 2.933480  | 14.516523 |
| 9             | 6             | 0.000000                | 1.522049  | 14.511404 |
| 10            | 6             | 0.000000                | 0.731989  | 13.347279 |
| 11            | 6             | 0.000000                | 2.950560  | 12.206744 |
| 12            | 6             | 0.000000                | 3.723952  | 13.360694 |
| 13            | 1             | 0.000000                | 4.750788  | 17.203123 |
| 14            | 1             | 0.000000                | 3.423158  | 19.336372 |
| 15            | 1             | 0.000000                | 1.010910  | 19.335986 |
| 16            | 6             | 0.000000                | -0.739659 | 17.171026 |
| 17            | 6             | 0.000000                | -1.505373 | 16.020920 |
| 18            | 6             | 0.000000                | -1.522049 | 14.511404 |
| 19            | 6             | 0.000000                | -0.731989 | 13.347279 |
| 20            | 6             | 0.000000                | -1.530110 | 12.201819 |
| 21            | 6             | 0.000000                | -3.723952 | 13.360694 |
| 22            | 6             | 0.000000                | -2.933480 | 14.516523 |
| 23            | 6             | 0.000000                | -2.928950 | 16.025744 |
| 24            | 6             | 0.000000                | -3.665342 | 17.179268 |
| 25            | 6             | 0.000000                | -2.902556 | 18.382457 |
| 26            | 6             | 0.000000                | -1.519075 | 18.377808 |

|     |   |          |           |            |
|-----|---|----------|-----------|------------|
| 27  | 1 | 0.000000 | -3.423158 | 19.336372  |
| 28  | 1 | 0.000000 | -1.010910 | 19.335986  |
| 29  | 1 | 0.000000 | 4.809013  | 13.368078  |
| 30  | 1 | 0.000000 | -4.750788 | 17.203123  |
| 31  | 6 | 0.000000 | 2.948708  | 10.695687  |
| 32  | 6 | 0.000000 | 1.533931  | 10.695307  |
| 33  | 6 | 0.000000 | 0.733443  | 9.540055   |
| 34  | 6 | 0.000000 | 1.531137  | 8.387355   |
| 35  | 6 | 0.000000 | 2.948800  | 8.388368   |
| 36  | 6 | 0.000000 | 3.731688  | 9.539893   |
| 37  | 6 | 0.000000 | -1.533931 | 10.695307  |
| 38  | 6 | 0.000000 | -0.733443 | 9.540055   |
| 39  | 6 | 0.000000 | -1.531137 | 8.387355   |
| 40  | 6 | 0.000000 | -2.948800 | 8.388368   |
| 41  | 6 | 0.000000 | -3.731688 | 9.539893   |
| 42  | 6 | 0.000000 | -2.948708 | 10.695687  |
| 43  | 6 | 0.000000 | -2.950560 | 12.206744  |
| 44  | 1 | 0.000000 | 4.816649  | 9.539363   |
| 45  | 1 | 0.000000 | -4.816649 | 9.539363   |
| 46  | 1 | 0.000000 | -4.809013 | 13.368078  |
| 47  | 6 | 0.000000 | 1.531452  | 0.753931   |
| 48  | 6 | 0.000000 | 2.947302  | 6.878366   |
| 49  | 6 | 0.000000 | 3.730677  | 5.724320   |
| 50  | 6 | 0.000000 | 1.532001  | 6.879390   |
| 51  | 6 | 0.000000 | 0.732848  | 5.724498   |
| 52  | 6 | 0.000000 | 1.531206  | 4.570648   |
| 53  | 6 | 0.000000 | 2.947740  | 4.571608   |
| 54  | 6 | 0.000000 | 2.947273  | 3.061685   |
| 55  | 6 | 0.000000 | 1.531556  | 3.062737   |
| 56  | 6 | 0.000000 | 0.732669  | 1.908167   |
| 57  | 6 | 0.000000 | 2.947487  | 0.754991   |
| 58  | 6 | 0.000000 | 3.730612  | 1.908195   |
| 59  | 1 | 0.000000 | 4.815603  | 5.724409   |
| 60  | 6 | 0.000000 | -0.732848 | 5.724498   |
| 61  | 6 | 0.000000 | -1.531206 | 4.570648   |
| 62  | 6 | 0.000000 | -1.531556 | 3.062737   |
| 63  | 6 | 0.000000 | -0.732669 | 1.908167   |
| 64  | 6 | 0.000000 | -1.531452 | 0.753931   |
| 65  | 6 | 0.000000 | -3.730612 | 1.908195   |
| 66  | 6 | 0.000000 | -2.947273 | 3.061685   |
| 67  | 6 | 0.000000 | -2.947740 | 4.571608   |
| 68  | 6 | 0.000000 | -3.730677 | 5.724320   |
| 69  | 6 | 0.000000 | -2.947302 | 6.878366   |
| 70  | 6 | 0.000000 | -1.532001 | 6.879390   |
| 71  | 1 | 0.000000 | 4.815529  | 1.908265   |
| 72  | 1 | 0.000000 | -4.815603 | 5.724409   |
| 73  | 6 | 0.000000 | -2.947487 | 0.754991   |
| 74  | 1 | 0.000000 | -4.815529 | 1.908265   |
| 75  | 6 | 0.000000 | 1.532001  | -6.879390  |
| 76  | 6 | 0.000000 | 2.947487  | -0.754991  |
| 77  | 6 | 0.000000 | 3.730612  | -1.908195  |
| 78  | 6 | 0.000000 | 1.531452  | -0.753931  |
| 79  | 6 | 0.000000 | 0.732669  | -1.908167  |
| 80  | 6 | 0.000000 | 1.531556  | -3.062737  |
| 81  | 6 | 0.000000 | 2.947273  | -3.061685  |
| 82  | 6 | 0.000000 | 2.947740  | -4.571608  |
| 83  | 6 | 0.000000 | 1.531206  | -4.570648  |
| 84  | 6 | 0.000000 | 0.732848  | -5.724498  |
| 85  | 6 | 0.000000 | 2.947302  | -6.878366  |
| 86  | 6 | 0.000000 | 3.730677  | -5.724320  |
| 87  | 1 | 0.000000 | 4.815529  | -1.908265  |
| 88  | 6 | 0.000000 | -0.732669 | -1.908167  |
| 89  | 6 | 0.000000 | -1.531556 | -3.062737  |
| 90  | 6 | 0.000000 | -1.531206 | -4.570648  |
| 91  | 6 | 0.000000 | -0.732848 | -5.724498  |
| 92  | 6 | 0.000000 | -1.532001 | -6.879390  |
| 93  | 6 | 0.000000 | -3.730677 | -5.724320  |
| 94  | 6 | 0.000000 | -2.947740 | -4.571608  |
| 95  | 6 | 0.000000 | -2.947273 | -3.061685  |
| 96  | 6 | 0.000000 | -3.730612 | -1.908195  |
| 97  | 6 | 0.000000 | -2.947487 | -0.754991  |
| 98  | 6 | 0.000000 | -1.531452 | -0.753931  |
| 99  | 1 | 0.000000 | 4.815603  | -5.724409  |
| 100 | 1 | 0.000000 | -4.815529 | -1.908265  |
| 101 | 6 | 0.000000 | 2.948800  | -8.388368  |
| 102 | 6 | 0.000000 | 1.531137  | -8.387355  |
| 103 | 6 | 0.000000 | 0.733443  | -9.540055  |
| 104 | 6 | 0.000000 | 1.533931  | -10.695307 |
| 105 | 6 | 0.000000 | 2.948708  | -10.695687 |

|     |   |          |           |            |
|-----|---|----------|-----------|------------|
| 106 | 6 | 0.000000 | 3.731688  | -9.539893  |
| 107 | 6 | 0.000000 | -1.531137 | -8.387355  |
| 108 | 6 | 0.000000 | -0.733443 | -9.540055  |
| 109 | 6 | 0.000000 | -1.533931 | -10.695307 |
| 110 | 6 | 0.000000 | -2.948708 | -10.695687 |
| 111 | 6 | 0.000000 | -3.731688 | -9.539893  |
| 112 | 6 | 0.000000 | -2.948800 | -8.388368  |
| 113 | 6 | 0.000000 | -2.947302 | -6.878366  |
| 114 | 1 | 0.000000 | 4.816649  | -9.539363  |
| 115 | 1 | 0.000000 | -4.816649 | -9.539363  |
| 116 | 1 | 0.000000 | -4.815603 | -5.724409  |
| 117 | 6 | 0.000000 | 1.519075  | -18.377808 |
| 118 | 6 | 0.000000 | 2.950560  | -12.206744 |
| 119 | 6 | 0.000000 | 3.723952  | -13.360694 |
| 120 | 6 | 0.000000 | 1.530110  | -12.201819 |
| 121 | 6 | 0.000000 | 0.731989  | -13.347279 |
| 122 | 6 | 0.000000 | 1.522049  | -14.511404 |
| 123 | 6 | 0.000000 | 2.933480  | -14.516523 |
| 124 | 6 | 0.000000 | 2.928950  | -16.025744 |
| 125 | 6 | 0.000000 | 1.505373  | -16.020920 |
| 126 | 6 | 0.000000 | 0.739659  | -17.171026 |
| 127 | 6 | 0.000000 | 2.902556  | -18.382457 |
| 128 | 6 | 0.000000 | 3.665342  | -17.179268 |
| 129 | 1 | 0.000000 | 4.809013  | -13.368078 |
| 130 | 6 | 0.000000 | -0.731989 | -13.347279 |
| 131 | 6 | 0.000000 | -1.522049 | -14.511404 |
| 132 | 6 | 0.000000 | -1.505373 | -16.020920 |
| 133 | 6 | 0.000000 | -0.739659 | -17.171026 |
| 134 | 6 | 0.000000 | -1.519075 | -18.377808 |
| 135 | 6 | 0.000000 | -3.665342 | -17.179268 |
| 136 | 6 | 0.000000 | -2.928950 | -16.025744 |
| 137 | 6 | 0.000000 | -2.933480 | -14.516523 |
| 138 | 6 | 0.000000 | -3.723952 | -13.360694 |
| 139 | 6 | 0.000000 | -2.950560 | -12.206744 |
| 140 | 6 | 0.000000 | -1.530110 | -12.201819 |
| 141 | 1 | 0.000000 | 4.750788  | -17.203123 |
| 142 | 1 | 0.000000 | -4.809013 | -13.368078 |
| 143 | 6 | 0.000000 | -2.902556 | -18.382457 |
| 144 | 1 | 0.000000 | -4.750788 | -17.203123 |
| 145 | 1 | 0.000000 | 1.010910  | -19.335986 |
| 146 | 1 | 0.000000 | 3.423158  | -19.336372 |
| 147 | 1 | 0.000000 | -1.010910 | -19.335986 |
| 148 | 1 | 0.000000 | -3.423158 | -19.336372 |

**Table S22.** The optimized Cartesian coordinates of the boron nitride sheet 1 ( $n \times m = 3 \times 1.5$ ) calculated at the B3LYP/6-31G(d) level of theory

| Center Number | Atomic Number | Coordinates (Angstroms) |           |           |
|---------------|---------------|-------------------------|-----------|-----------|
|               |               | X                       | Y         | Z         |
| 1             | 5             | 0.000000                | 5.087560  | -5.144331 |
| 2             | 7             | 0.000000                | 3.856746  | -5.897150 |
| 3             | 7             | 0.000000                | 5.038945  | -3.714676 |
| 4             | 5             | 0.000000                | 3.822464  | -2.925314 |
| 5             | 7             | 0.000000                | 2.626873  | -3.702762 |
| 6             | 5             | 0.000000                | 2.640571  | -5.173867 |
| 7             | 7             | 0.000000                | 1.193609  | -5.372582 |
| 8             | 5             | 0.000000                | 1.185539  | -3.899991 |
| 9             | 7             | 0.000000                | 0.000000  | -3.096196 |
| 10            | 5             | 0.000000                | -1.185539 | -3.899991 |
| 11            | 7             | 0.000000                | -1.193609 | -5.372582 |
| 12            | 5             | 0.000000                | 0.000000  | -6.163503 |
| 13            | 1             | 0.000000                | 3.884866  | -6.908156 |
| 14            | 1             | 0.000000                | 6.139437  | -5.716239 |
| 15            | 1             | 0.000000                | 5.926449  | -3.229471 |
| 16            | 1             | 0.000000                | 0.000000  | -7.361773 |
| 17            | 7             | 0.000000                | 3.843675  | -1.455513 |
| 18            | 5             | 0.000000                | 2.646344  | -0.674155 |
| 19            | 7             | 0.000000                | 1.197388  | -0.858305 |
| 20            | 5             | 0.000000                | 0.000000  | -1.644061 |
| 21            | 7             | 0.000000                | -1.197388 | -0.858305 |
| 22            | 5             | 0.000000                | -1.185925 | 0.607409  |

|    |   |          |           |           |
|----|---|----------|-----------|-----------|
| 23 | 7 | 0.000000 | 0.000000  | 1.413566  |
| 24 | 5 | 0.000000 | 1.185925  | 0.607409  |
| 25 | 7 | 0.000000 | 2.629560  | 0.797757  |
| 26 | 5 | 0.000000 | 3.820807  | 1.573122  |
| 27 | 7 | 0.000000 | 5.027951  | 0.769021  |
| 28 | 5 | 0.000000 | 5.061393  | -0.658033 |
| 29 | 1 | 0.000000 | 5.923589  | 1.239375  |
| 30 | 1 | 0.000000 | 6.134510  | -1.191518 |
| 31 | 7 | 0.000000 | 3.846865  | 3.041333  |
| 32 | 5 | 0.000000 | 2.648386  | 3.825141  |
| 33 | 7 | 0.000000 | 1.198227  | 3.652850  |
| 34 | 5 | 0.000000 | 0.000000  | 2.866712  |
| 35 | 7 | 0.000000 | -1.198227 | 3.652850  |
| 36 | 5 | 0.000000 | -1.196206 | 5.121887  |
| 37 | 7 | 0.000000 | 0.000000  | 5.900734  |
| 38 | 5 | 0.000000 | 1.196206  | 5.121887  |
| 39 | 7 | 0.000000 | 2.643046  | 5.298601  |
| 40 | 5 | 0.000000 | 3.838675  | 6.054204  |
| 41 | 7 | 0.000000 | 5.042897  | 5.255237  |
| 42 | 5 | 0.000000 | 5.072536  | 3.825697  |
| 43 | 1 | 0.000000 | 5.935746  | 5.731587  |
| 44 | 1 | 0.000000 | 6.140056  | 3.282041  |
| 45 | 5 | 0.000000 | -2.640571 | -5.173867 |
| 46 | 7 | 0.000000 | -3.856746 | -5.897150 |
| 47 | 7 | 0.000000 | -2.626873 | -3.702762 |
| 48 | 5 | 0.000000 | -3.822464 | -2.925314 |
| 49 | 7 | 0.000000 | -5.038945 | -3.714676 |
| 50 | 5 | 0.000000 | -5.087560 | -5.144331 |
| 51 | 1 | 0.000000 | -3.884866 | -6.908156 |
| 52 | 7 | 0.000000 | -3.843675 | -1.455513 |
| 53 | 5 | 0.000000 | -5.061393 | -0.658033 |
| 54 | 7 | 0.000000 | -5.027951 | 0.769021  |
| 55 | 5 | 0.000000 | -3.820807 | 1.573122  |
| 56 | 7 | 0.000000 | -2.629560 | 0.797757  |
| 57 | 5 | 0.000000 | -2.646344 | -0.674155 |
| 58 | 7 | 0.000000 | -3.846865 | 3.041333  |
| 59 | 5 | 0.000000 | -5.072536 | 3.825697  |
| 60 | 7 | 0.000000 | -5.042897 | 5.255237  |
| 61 | 5 | 0.000000 | -3.838675 | 6.054204  |
| 62 | 7 | 0.000000 | -2.643046 | 5.298601  |
| 63 | 5 | 0.000000 | -2.648386 | 3.825141  |
| 64 | 1 | 0.000000 | 0.000000  | 6.912889  |
| 65 | 1 | 0.000000 | 3.890526  | 7.250067  |
| 66 | 1 | 0.000000 | -5.926449 | -3.229471 |
| 67 | 1 | 0.000000 | -6.139437 | -5.716239 |
| 68 | 1 | 0.000000 | -6.134510 | -1.191518 |
| 69 | 1 | 0.000000 | -5.923589 | 1.239375  |
| 70 | 1 | 0.000000 | -6.140056 | 3.282041  |
| 71 | 1 | 0.000000 | -5.935746 | 5.731587  |
| 72 | 1 | 0.000000 | -3.890526 | 7.250067  |

**Table S23.** The optimized Cartesian coordinates of the boron nitride sheet 2 ( $n \times m = 3 \times 2$ ) calculated at the B3LYP/6-31G(d) level of theory

| Center Number | Atomic Number | Coordinates (Angstroms) |          |          |
|---------------|---------------|-------------------------|----------|----------|
|               |               | X                       | Y        | Z        |
| 1             | 5             | -3.388218               | 3.988839 | 0.000000 |
| 2             | 7             | -3.157602               | 5.399736 | 0.000000 |
| 3             | 7             | -2.287427               | 3.007064 | 0.000000 |
| 4             | 5             | -0.900354               | 3.366188 | 0.000000 |
| 5             | 7             | -0.681932               | 4.782728 | 0.000000 |
| 6             | 5             | -1.778717               | 5.762849 | 0.000000 |
| 7             | 7             | -0.941478               | 6.957361 | 0.000000 |
| 8             | 5             | 0.157313                | 5.976405 | 0.000000 |
| 9             | 7             | 1.542070                | 6.343244 | 0.000000 |
| 10            | 5             | 1.778717                | 7.779333 | 0.000000 |
| 11            | 7             | 0.696020                | 8.712662 | 0.000000 |
| 12            | 5             | -0.703614               | 8.351439 | 0.000000 |
| 13            | 1             | -3.906443               | 6.080470 | 0.000000 |
| 14            | 1             | 2.896873                | 8.209748 | 0.000000 |
| 15            | 1             | 0.938367                | 9.695136 | 0.000000 |



|    |   |           |           |          |
|----|---|-----------|-----------|----------|
| 16 | 1 | -1.557565 | 9.190281  | 0.000000 |
| 17 | 5 | -8.472609 | -1.822969 | 0.000000 |
| 18 | 7 | -8.218091 | -0.402580 | 0.000000 |
| 19 | 7 | -7.370221 | -2.734002 | 0.000000 |
| 20 | 5 | -5.972175 | -2.349844 | 0.000000 |
| 21 | 7 | -5.758463 | -0.938186 | 0.000000 |
| 22 | 5 | -6.869998 | 0.024732  | 0.000000 |
| 23 | 7 | -6.060293 | 1.241121  | 0.000000 |
| 24 | 5 | -4.950007 | 0.270903  | 0.000000 |
| 25 | 7 | -3.561246 | 0.625255  | 0.000000 |
| 26 | 5 | -3.381899 | 2.048034  | 0.000000 |
| 27 | 7 | -4.484434 | 3.032095  | 0.000000 |
| 28 | 5 | -5.868668 | 2.657478  | 0.000000 |
| 29 | 1 | -8.991683 | 0.248734  | 0.000000 |
| 30 | 1 | -9.598133 | -2.230743 | 0.000000 |
| 31 | 1 | -7.595140 | -3.720147 | 0.000000 |
| 32 | 1 | -6.766959 | 3.450331  | 0.000000 |
| 33 | 7 | 0.185938  | 2.392863  | 0.000000 |
| 34 | 5 | 1.579071  | 2.735078  | 0.000000 |
| 35 | 7 | 2.400367  | 3.937832  | 0.000000 |
| 36 | 5 | 2.616450  | 5.343670  | 0.000000 |
| 37 | 7 | 4.020945  | 5.707203  | 0.000000 |
| 38 | 5 | 5.107566  | 4.782802  | 0.000000 |
| 39 | 7 | 4.890165  | 3.342954  | 0.000000 |
| 40 | 5 | 3.509659  | 2.971563  | 0.000000 |
| 41 | 7 | 2.685092  | 1.766397  | 0.000000 |
| 42 | 5 | 2.478133  | 0.349482  | 0.000000 |
| 43 | 7 | 1.094463  | -0.014771 | 0.000000 |
| 44 | 5 | 0.000448  | 0.970391  | 0.000000 |
| 45 | 1 | 6.220550  | 5.227265  | 0.000000 |
| 46 | 1 | 4.265510  | 6.688802  | 0.000000 |
| 47 | 7 | -4.890165 | -3.342954 | 0.000000 |
| 48 | 5 | -3.509659 | -2.971563 | 0.000000 |
| 49 | 7 | -2.685092 | -1.766397 | 0.000000 |
| 50 | 5 | -2.478133 | -0.349482 | 0.000000 |
| 51 | 7 | -1.094463 | 0.014771  | 0.000000 |
| 52 | 5 | -0.000448 | -0.970391 | 0.000000 |
| 53 | 7 | -0.185938 | -2.392863 | 0.000000 |
| 54 | 5 | -1.579071 | -2.735078 | 0.000000 |
| 55 | 7 | -2.400367 | -3.937832 | 0.000000 |
| 56 | 5 | -2.616450 | -5.343670 | 0.000000 |
| 57 | 7 | -4.020945 | -5.707203 | 0.000000 |
| 58 | 5 | -5.107566 | -4.782802 | 0.000000 |
| 59 | 1 | -4.265510 | -6.688802 | 0.000000 |
| 60 | 1 | -6.220550 | -5.227265 | 0.000000 |
| 61 | 7 | 3.561246  | -0.625255 | 0.000000 |
| 62 | 5 | 4.950007  | -0.270903 | 0.000000 |
| 63 | 7 | 5.758463  | 0.938186  | 0.000000 |
| 64 | 5 | 5.972175  | 2.349844  | 0.000000 |
| 65 | 7 | 7.370221  | 2.734002  | 0.000000 |
| 66 | 5 | 8.472609  | 1.822969  | 0.000000 |
| 67 | 7 | 8.218091  | 0.402580  | 0.000000 |
| 68 | 5 | 6.869998  | -0.024732 | 0.000000 |
| 69 | 7 | 6.060293  | -1.241121 | 0.000000 |
| 70 | 5 | 5.868668  | -2.657478 | 0.000000 |
| 71 | 7 | 4.484434  | -3.032095 | 0.000000 |
| 72 | 5 | 3.381899  | -2.048034 | 0.000000 |
| 73 | 1 | 9.598133  | 2.230743  | 0.000000 |
| 74 | 1 | 7.595140  | 3.720147  | 0.000000 |
| 75 | 7 | -1.542070 | -6.343244 | 0.000000 |
| 76 | 5 | -0.157313 | -5.976405 | 0.000000 |
| 77 | 7 | 0.681932  | -4.782728 | 0.000000 |
| 78 | 5 | 0.900354  | -3.366188 | 0.000000 |
| 79 | 7 | 2.287427  | -3.007064 | 0.000000 |
| 80 | 5 | 3.388218  | -3.988839 | 0.000000 |
| 81 | 7 | 3.157602  | -5.399736 | 0.000000 |
| 82 | 5 | 1.778717  | -5.762849 | 0.000000 |
| 83 | 7 | 0.941478  | -6.957361 | 0.000000 |
| 84 | 5 | 0.703614  | -8.351439 | 0.000000 |
| 85 | 7 | -0.696020 | -8.712662 | 0.000000 |
| 86 | 5 | -1.778717 | -7.779333 | 0.000000 |
| 87 | 1 | -0.938367 | -9.695136 | 0.000000 |
| 88 | 1 | -2.896873 | -8.209748 | 0.000000 |
| 89 | 1 | 8.991683  | -0.248734 | 0.000000 |
| 90 | 1 | 6.766959  | -3.450331 | 0.000000 |
| 91 | 1 | 3.906443  | -6.080470 | 0.000000 |
| 92 | 1 | 1.557565  | -9.190281 | 0.000000 |

---

**Table S24.** The optimized Cartesian coordinates of the boron nitride sheet **3** ( $n \times m = 3 \times 3$ ) calculated at the B3LYP/6-31G(d) level of theory

| Center<br>Number | Atomic<br>Number | Coordinates (Angstroms) |           |          |
|------------------|------------------|-------------------------|-----------|----------|
|                  |                  | X                       | Y         | Z        |
| 1                | 5                | 3.399027                | 11.480509 | 0.000000 |
| 2                | 7                | 2.016589                | 11.067763 | 0.000000 |
| 3                | 7                | 4.428397                | 10.487753 | 0.000000 |
| 4                | 5                | 4.203381                | 9.055402  | 0.000000 |
| 5                | 7                | 2.825725                | 8.683830  | 0.000000 |
| 6                | 5                | 1.744002                | 9.679887  | 0.000000 |
| 7                | 7                | 0.627558                | 8.737991  | 0.000000 |
| 8                | 5                | 1.716020                | 7.743201  | 0.000000 |
| 9                | 7                | 1.519898                | 6.322662  | 0.000000 |
| 10               | 5                | 0.125724                | 5.986218  | 0.000000 |
| 11               | 7                | -0.973687               | 6.972374  | 0.000000 |
| 12               | 5                | -0.758079               | 8.389562  | 0.000000 |
| 13               | 1                | 1.282160                | 11.762941 | 0.000000 |
| 14               | 1                | 3.677416                | 12.644834 | 0.000000 |
| 15               | 1                | 5.382760                | 10.822704 | 0.000000 |
| 16               | 1                | -1.646883               | 9.193051  | 0.000000 |
| 17               | 7                | 5.310882                | 8.091256  | 0.000000 |
| 18               | 5                | 5.096539                | 6.677477  | 0.000000 |
| 19               | 7                | 3.992944                | 5.720148  | 0.000000 |
| 20               | 5                | 2.608348                | 5.354338  | 0.000000 |
| 21               | 7                | 2.401514                | 3.936796  | 0.000000 |
| 22               | 5                | 3.504978                | 2.962619  | 0.000000 |
| 23               | 7                | 4.897683                | 3.308745  | 0.000000 |
| 24               | 5                | 5.080884                | 4.732107  | 0.000000 |
| 25               | 7                | 6.182623                | 5.685081  | 0.000000 |
| 26               | 5                | 7.554581                | 6.060444  | 0.000000 |
| 27               | 7                | 7.757602                | 7.496403  | 0.000000 |
| 28               | 5                | 6.716090                | 8.470712  | 0.000000 |
| 29               | 1                | 8.705241                | 7.850263  | 0.000000 |
| 30               | 1                | 7.031726                | 9.626875  | 0.000000 |
| 31               | 7                | 8.670506                | 5.107936  | 0.000000 |
| 32               | 5                | 8.462495                | 3.691094  | 0.000000 |
| 33               | 7                | 7.372070                | 2.720592  | 0.000000 |
| 34               | 5                | 5.989387                | 2.342127  | 0.000000 |
| 35               | 7                | 5.791039                | 0.921953  | 0.000000 |
| 36               | 5                | 6.895682                | -0.054640 | 0.000000 |
| 37               | 7                | 8.270127                | 0.333396  | 0.000000 |
| 38               | 5                | 8.472710                | 1.744422  | 0.000000 |
| 39               | 7                | 9.562686                | 2.712003  | 0.000000 |
| 40               | 5                | 10.920888               | 3.105810  | 0.000000 |
| 41               | 7                | 11.120993               | 4.537175  | 0.000000 |
| 42               | 5                | 10.070171               | 5.506260  | 0.000000 |
| 43               | 1                | 12.069377               | 4.890091  | 0.000000 |
| 44               | 1                | 10.370679               | 6.666127  | 0.000000 |
| 45               | 1                | 9.031086                | -0.333699 | 0.000000 |
| 46               | 1                | 11.850599               | 2.351928  | 0.000000 |
| 47               | 5                | -1.802970               | 5.777735  | 0.000000 |
| 48               | 7                | -3.180164               | 5.402272  | 0.000000 |
| 49               | 7                | -0.704717               | 4.791345  | 0.000000 |
| 50               | 5                | -0.911087               | 3.372868  | 0.000000 |
| 51               | 7                | -2.298845               | 3.008309  | 0.000000 |
| 52               | 5                | -3.399027               | 3.992575  | 0.000000 |
| 53               | 7                | -4.494693               | 3.034697  | 0.000000 |
| 54               | 5                | -3.391850               | 2.049258  | 0.000000 |
| 55               | 7                | -3.573324               | 0.624259  | 0.000000 |
| 56               | 5                | -4.966427               | 0.277653  | 0.000000 |
| 57               | 7                | -6.076085               | 1.255528  | 0.000000 |
| 58               | 5                | -5.877883               | 2.672951  | 0.000000 |
| 59               | 1                | -3.934502               | 6.076858  | 0.000000 |
| 60               | 1                | -6.773636               | 3.468424  | 0.000000 |
| 61               | 7                | 0.179731                | 2.398160  | 0.000000 |
| 62               | 5                | -0.000683               | 0.973064  | 0.000000 |
| 63               | 7                | -1.095229               | 0.015368  | 0.000000 |
| 64               | 5                | -2.481085               | -0.346456 | 0.000000 |
| 65               | 7                | -2.681476               | -1.764211 | 0.000000 |
| 66               | 5                | -1.574615               | -2.740268 | 0.000000 |
| 67               | 7                | -0.179731               | -2.398160 | 0.000000 |
| 68               | 5                | 0.000683                | -0.973064 | 0.000000 |
| 69               | 7                | 1.095229                | -0.015368 | 0.000000 |
| 70               | 5                | 2.481085                | 0.346456  | 0.000000 |

|     |   |            |            |          |
|-----|---|------------|------------|----------|
| 71  | 7 | 2.681476   | 1.764211   | 0.000000 |
| 72  | 5 | 1.574615   | 2.740268   | 0.000000 |
| 73  | 7 | 3.573324   | -0.624259  | 0.000000 |
| 74  | 5 | 3.391850   | -2.049258  | 0.000000 |
| 75  | 7 | 2.298845   | -3.008309  | 0.000000 |
| 76  | 5 | 0.911087   | -3.372868  | 0.000000 |
| 77  | 7 | 0.704717   | -4.791345  | 0.000000 |
| 78  | 5 | 1.802970   | -5.777735  | 0.000000 |
| 79  | 7 | 3.180164   | -5.402272  | 0.000000 |
| 80  | 5 | 3.399027   | -3.992575  | 0.000000 |
| 81  | 7 | 4.494693   | -3.034697  | 0.000000 |
| 82  | 5 | 5.877883   | -2.672951  | 0.000000 |
| 83  | 7 | 6.076085   | -1.255528  | 0.000000 |
| 84  | 5 | 4.966427   | -0.277653  | 0.000000 |
| 85  | 1 | 3.934502   | -6.076858  | 0.000000 |
| 86  | 1 | 6.773636   | -3.468424  | 0.000000 |
| 87  | 5 | -6.895682  | 0.054640   | 0.000000 |
| 88  | 7 | -8.270127  | -0.333396  | 0.000000 |
| 89  | 7 | -5.791039  | -0.921953  | 0.000000 |
| 90  | 5 | -5.989387  | -2.342127  | 0.000000 |
| 91  | 7 | -7.372070  | -2.720592  | 0.000000 |
| 92  | 5 | -8.472710  | -1.744422  | 0.000000 |
| 93  | 7 | -9.562686  | -2.712003  | 0.000000 |
| 94  | 5 | -8.462495  | -3.691094  | 0.000000 |
| 95  | 7 | -8.670506  | -5.107936  | 0.000000 |
| 96  | 5 | -10.070171 | -5.506260  | 0.000000 |
| 97  | 7 | -11.120993 | -4.537175  | 0.000000 |
| 98  | 5 | -10.920888 | -3.105810  | 0.000000 |
| 99  | 1 | -9.031086  | 0.333699   | 0.000000 |
| 100 | 1 | -10.370679 | -6.666127  | 0.000000 |
| 101 | 1 | -12.069377 | -4.890091  | 0.000000 |
| 102 | 1 | -11.850599 | -2.351928  | 0.000000 |
| 103 | 7 | -4.897683  | -3.308745  | 0.000000 |
| 104 | 5 | -5.080884  | -4.732107  | 0.000000 |
| 105 | 7 | -6.182623  | -5.685081  | 0.000000 |
| 106 | 5 | -7.554581  | -6.060444  | 0.000000 |
| 107 | 7 | -7.757602  | -7.496403  | 0.000000 |
| 108 | 5 | -6.716090  | -8.470712  | 0.000000 |
| 109 | 7 | -5.310882  | -8.091256  | 0.000000 |
| 110 | 5 | -5.096539  | -6.677477  | 0.000000 |
| 111 | 7 | -3.992944  | -5.720148  | 0.000000 |
| 112 | 5 | -2.608348  | -5.354338  | 0.000000 |
| 113 | 7 | -2.401514  | -3.936796  | 0.000000 |
| 114 | 5 | -3.504978  | -2.962619  | 0.000000 |
| 115 | 1 | -7.031726  | -9.626875  | 0.000000 |
| 116 | 1 | -8.705241  | -7.850263  | 0.000000 |
| 117 | 7 | -1.519898  | -6.322662  | 0.000000 |
| 118 | 5 | -1.716020  | -7.743201  | 0.000000 |
| 119 | 7 | -2.825725  | -8.683830  | 0.000000 |
| 120 | 5 | -4.203381  | -9.055402  | 0.000000 |
| 121 | 7 | -4.428397  | -10.487753 | 0.000000 |
| 122 | 5 | -3.399027  | -11.480509 | 0.000000 |
| 123 | 7 | -2.016589  | -11.067763 | 0.000000 |
| 124 | 5 | -1.744002  | -9.679887  | 0.000000 |
| 125 | 7 | -0.627558  | -8.737991  | 0.000000 |
| 126 | 5 | 0.758079   | -8.389562  | 0.000000 |
| 127 | 7 | 0.973687   | -6.972374  | 0.000000 |
| 128 | 5 | -0.125724  | -5.986218  | 0.000000 |
| 129 | 1 | -3.677416  | -12.644834 | 0.000000 |
| 130 | 1 | -5.382760  | -10.822704 | 0.000000 |
| 131 | 1 | -1.282160  | -11.762941 | 0.000000 |
| 132 | 1 | 1.646883   | -9.193051  | 0.000000 |

**Table S25.** The optimized Cartesian coordinates of the boron nitride sheet 4 ( $n \times m = 4 \times 2$ ) calculated at the B3LYP/6-31G(d) level of theory

| Center Number | Atomic Number | Coordinates (Angstroms) |           |          |
|---------------|---------------|-------------------------|-----------|----------|
|               |               | X                       | Y         | Z        |
| 1             | 5             | 9.558423                | -3.443524 | 0.000000 |
| 2             | 7             | 8.798569                | -4.670433 | 0.000000 |
| 3             | 7             | 8.869703                | -2.190290 | 0.000000 |
| 4             | 5             | 7.428242                | -2.031787 | 0.000000 |
| 5             | 7             | 6.709725                | -3.266677 | 0.000000 |

|    |   |           |            |          |
|----|---|-----------|------------|----------|
| 6  | 5 | 7.387808  | -4.571841  | 0.000000 |
| 7  | 7 | 6.186591  | -5.404781  | 0.000000 |
| 8  | 5 | 5.512958  | -4.093813  | 0.000000 |
| 9  | 7 | 4.091049  | -3.913789  | 0.000000 |
| 10 | 5 | 3.398633  | -5.169708  | 0.000000 |
| 11 | 7 | 4.060359  | -6.490722  | 0.000000 |
| 12 | 5 | 5.486195  | -6.651013  | 0.000000 |
| 13 | 1 | 9.278605  | -5.560665  | 0.000000 |
| 14 | 1 | 10.755062 | -3.480135  | 0.000000 |
| 15 | 1 | 9.442423  | -1.356455  | 0.000000 |
| 16 | 1 | 6.029321  | -7.718986  | 0.000000 |
| 17 | 7 | 6.789911  | -0.708707  | 0.000000 |
| 18 | 5 | 5.369809  | -0.547723  | 0.000000 |
| 19 | 7 | 4.160932  | -1.368271  | 0.000000 |
| 20 | 5 | 3.444827  | -2.608527  | 0.000000 |
| 21 | 7 | 2.023174  | -2.439893  | 0.000000 |
| 22 | 5 | 1.370401  | -1.121404  | 0.000000 |
| 23 | 7 | 2.069892  | 0.129837   | 0.000000 |
| 24 | 5 | 3.490176  | -0.061158  | 0.000000 |
| 25 | 7 | 4.692532  | 0.758313   | 0.000000 |
| 26 | 5 | 5.405311  | 1.991134   | 0.000000 |
| 27 | 7 | 6.846243  | 1.812402   | 0.000000 |
| 28 | 5 | 7.518260  | 0.553311   | 0.000000 |
| 29 | 1 | 7.434173  | 2.635921   | 0.000000 |
| 30 | 1 | 8.716938  | 0.558597   | 0.000000 |
| 31 | 7 | 4.771436  | 3.314295   | 0.000000 |
| 32 | 5 | 3.349810  | 3.482990   | 0.000000 |
| 33 | 7 | 2.137148  | 2.672018   | 0.000000 |
| 34 | 5 | 1.421446  | 1.432588   | 0.000000 |
| 35 | 7 | 0.000848  | 1.604016   | 0.000000 |
| 36 | 5 | -0.652341 | 2.922957   | 0.000000 |
| 37 | 7 | 0.047192  | 4.175830   | 0.000000 |
| 38 | 5 | 1.468546  | 3.980688   | 0.000000 |
| 39 | 7 | 2.678984  | 4.791966   | 0.000000 |
| 40 | 5 | 3.398633  | 6.018154   | 0.000000 |
| 41 | 7 | 4.839194  | 5.834074   | 0.000000 |
| 42 | 5 | 5.506110  | 4.572635   | 0.000000 |
| 43 | 1 | 5.430926  | 6.654698   | 0.000000 |
| 44 | 1 | 6.704887  | 4.570566   | 0.000000 |
| 45 | 5 | 2.687888  | -6.975949  | 0.000000 |
| 46 | 7 | 1.951173  | -8.201765  | 0.000000 |
| 47 | 7 | 2.026805  | -5.657373  | 0.000000 |
| 48 | 5 | 0.604769  | -5.479987  | 0.000000 |
| 49 | 7 | -0.121776 | -6.715524  | 0.000000 |
| 50 | 5 | 0.535029  | -8.031090  | 0.000000 |
| 51 | 7 | -0.685579 | -8.831002  | 0.000000 |
| 52 | 5 | -1.343865 | -7.513245  | 0.000000 |
| 53 | 7 | -2.767413 | -7.342839  | 0.000000 |
| 54 | 5 | -3.516880 | -8.590658  | 0.000000 |
| 55 | 7 | -2.855525 | -9.857813  | 0.000000 |
| 56 | 5 | -1.420954 | -10.038634 | 0.000000 |
| 57 | 1 | 2.395885  | -9.111260  | 0.000000 |
| 58 | 1 | -0.937382 | -11.133651 | 0.000000 |
| 59 | 7 | -0.047192 | -4.175830  | 0.000000 |
| 60 | 5 | -1.468546 | -3.980688  | 0.000000 |
| 61 | 7 | -2.678984 | -4.791966  | 0.000000 |
| 62 | 5 | -3.398633 | -6.018154  | 0.000000 |
| 63 | 7 | -4.839194 | -5.834074  | 0.000000 |
| 64 | 5 | -5.506110 | -4.572635  | 0.000000 |
| 65 | 7 | -4.771436 | -3.314295  | 0.000000 |
| 66 | 5 | -3.349810 | -3.482990  | 0.000000 |
| 67 | 7 | -2.137148 | -2.672018  | 0.000000 |
| 68 | 5 | -1.421446 | -1.432588  | 0.000000 |
| 69 | 7 | -0.000848 | -1.604016  | 0.000000 |
| 70 | 5 | 0.652341  | -2.922957  | 0.000000 |
| 71 | 7 | -2.069892 | -0.129837  | 0.000000 |
| 72 | 5 | -3.490176 | 0.061158   | 0.000000 |
| 73 | 7 | -4.692532 | -0.758313  | 0.000000 |
| 74 | 5 | -5.405311 | -1.991134  | 0.000000 |
| 75 | 7 | -6.846243 | -1.812402  | 0.000000 |
| 76 | 5 | -7.518260 | -0.553311  | 0.000000 |
| 77 | 7 | -6.789911 | 0.708707   | 0.000000 |
| 78 | 5 | -5.369809 | 0.547723   | 0.000000 |
| 79 | 7 | -4.160932 | 1.368271   | 0.000000 |
| 80 | 5 | -3.444827 | 2.608527   | 0.000000 |
| 81 | 7 | -2.023174 | 2.439893   | 0.000000 |
| 82 | 5 | -1.370401 | 1.121404   | 0.000000 |
| 83 | 5 | 3.516880  | 8.590658   | 0.000000 |
| 84 | 7 | 2.767413  | 7.342839   | 0.000000 |

|     |   |            |            |          |
|-----|---|------------|------------|----------|
| 85  | 7 | 2.855525   | 9.857813   | 0.000000 |
| 86  | 5 | 1.420954   | 10.038634  | 0.000000 |
| 87  | 7 | 0.685579   | 8.831002   | 0.000000 |
| 88  | 5 | 1.343865   | 7.513245   | 0.000000 |
| 89  | 7 | 0.121776   | 6.715524   | 0.000000 |
| 90  | 5 | -0.535029  | 8.031090   | 0.000000 |
| 91  | 7 | -1.951173  | 8.201765   | 0.000000 |
| 92  | 5 | -2.687888  | 6.975949   | 0.000000 |
| 93  | 7 | -2.026805  | 5.657373   | 0.000000 |
| 94  | 5 | -0.604769  | 5.479987   | 0.000000 |
| 95  | 1 | 4.715124   | 8.577209   | 0.000000 |
| 96  | 1 | 3.443727   | 10.681316  | 0.000000 |
| 97  | 5 | -3.398633  | 5.169708   | 0.000000 |
| 98  | 7 | -4.091049  | 3.913789   | 0.000000 |
| 99  | 7 | -4.060359  | 6.490722   | 0.000000 |
| 100 | 5 | -5.486195  | 6.651013   | 0.000000 |
| 101 | 7 | -6.186591  | 5.404781   | 0.000000 |
| 102 | 5 | -5.512958  | 4.093813   | 0.000000 |
| 103 | 7 | -6.709725  | 3.266677   | 0.000000 |
| 104 | 5 | -7.387808  | 4.571841   | 0.000000 |
| 105 | 7 | -8.798569  | 4.670433   | 0.000000 |
| 106 | 5 | -9.558423  | 3.443524   | 0.000000 |
| 107 | 7 | -8.869703  | 2.190290   | 0.000000 |
| 108 | 5 | -7.428242  | 2.031787   | 0.000000 |
| 109 | 1 | -4.715124  | -8.577209  | 0.000000 |
| 110 | 1 | -3.443727  | -10.681316 | 0.000000 |
| 111 | 1 | -5.430926  | -6.654698  | 0.000000 |
| 112 | 1 | -6.704887  | -4.570566  | 0.000000 |
| 113 | 1 | -7.434173  | -2.635921  | 0.000000 |
| 114 | 1 | -8.716938  | -0.558597  | 0.000000 |
| 115 | 1 | 0.937382   | 11.133651  | 0.000000 |
| 116 | 1 | -2.395885  | 9.111260   | 0.000000 |
| 117 | 1 | -6.029321  | 7.718986   | 0.000000 |
| 118 | 1 | -9.278605  | 5.560665   | 0.000000 |
| 119 | 1 | -10.755062 | 3.480135   | 0.000000 |
| 120 | 1 | -9.442423  | 1.356455   | 0.000000 |

**Table S26.** The optimized Cartesian coordinates of the zigzag boron nitride ribbon ( $n \times m = 2 \times 2$ ) calculated at the B3LYP/6-31G(d) level of theory

| Center Number | Atomic Number | Coordinates (Angstroms) |           |          |
|---------------|---------------|-------------------------|-----------|----------|
|               |               | X                       | Y         | Z        |
| 1             | 5             | -0.654252               | 2.936122  | 0.000000 |
| 2             | 7             | 0.081937                | 4.160076  | 0.000000 |
| 3             | 7             | 0.001249                | 1.615011  | 0.000000 |
| 4             | 5             | 1.422079                | 1.432183  | 0.000000 |
| 5             | 7             | 2.151234                | 2.666359  | 0.000000 |
| 6             | 5             | 1.496670                | 3.983940  | 0.000000 |
| 7             | 7             | 2.714889                | 4.783358  | 0.000000 |
| 8             | 5             | 3.373558                | 3.465741  | 0.000000 |
| 9             | 7             | 4.794637                | 3.296686  | 0.000000 |
| 10            | 5             | 5.543765                | 4.543916  | 0.000000 |
| 11            | 7             | 4.882686                | 5.811936  | 0.000000 |
| 12            | 5             | 3.449110                | 5.992071  | 0.000000 |
| 13            | 1             | -0.360340               | 5.070242  | 0.000000 |
| 14            | 7             | 2.065922                | 0.122556  | 0.000000 |
| 15            | 5             | 3.487149                | -0.070449 | 0.000000 |
| 16            | 7             | 4.693410                | 0.744841  | 0.000000 |
| 17            | 5             | 5.425008                | 1.969012  | 0.000000 |
| 18            | 7             | 6.864500                | 1.799199  | 0.000000 |
| 19            | 5             | 7.542473                | 0.539692  | 0.000000 |
| 20            | 7             | 6.770742                | -0.678913 | 0.000000 |
| 21            | 5             | 5.361041                | -0.565418 | 0.000000 |
| 22            | 7             | 4.153900                | -1.386020 | 0.000000 |
| 23            | 5             | 3.449110                | -2.628823 | 0.000000 |
| 24            | 7             | 2.026917                | -2.456946 | 0.000000 |
| 25            | 5             | 1.370632                | -1.132330 | 0.000000 |
| 26            | 1             | 8.738607                | 0.493553  | 0.000000 |
| 27            | 1             | 7.445208                | 2.627258  | 0.000000 |
| 28            | 1             | 6.741813                | 4.533341  | 0.000000 |
| 29            | 1             | 5.471161                | 6.635116  | 0.000000 |

|    |   |           |           |          |
|----|---|-----------|-----------|----------|
| 30 | 1 | 2.963469  | 7.086252  | 0.000000 |
| 31 | 5 | -7.542473 | -0.539692 | 0.000000 |
| 32 | 7 | -6.770742 | 0.678913  | 0.000000 |
| 33 | 7 | -6.864500 | -1.799199 | 0.000000 |
| 34 | 5 | -5.425008 | -1.969012 | 0.000000 |
| 35 | 7 | -4.693410 | -0.744841 | 0.000000 |
| 36 | 5 | -5.361041 | 0.565418  | 0.000000 |
| 37 | 7 | -4.153900 | 1.386020  | 0.000000 |
| 38 | 5 | -3.487149 | 0.070449  | 0.000000 |
| 39 | 7 | -2.065922 | -0.122556 | 0.000000 |
| 40 | 5 | -1.370632 | 1.132330  | 0.000000 |
| 41 | 7 | -2.026917 | 2.456946  | 0.000000 |
| 42 | 5 | -3.449110 | 2.628823  | 0.000000 |
| 43 | 1 | -7.240306 | 1.574550  | 0.000000 |
| 44 | 1 | -8.738607 | -0.493553 | 0.000000 |
| 45 | 1 | -7.445208 | -2.627258 | 0.000000 |
| 46 | 7 | -4.794637 | -3.296686 | 0.000000 |
| 47 | 5 | -3.373558 | -3.465741 | 0.000000 |
| 48 | 7 | -2.151234 | -2.666359 | 0.000000 |
| 49 | 5 | -1.422079 | -1.432183 | 0.000000 |
| 50 | 7 | -0.001249 | -1.615011 | 0.000000 |
| 51 | 5 | 0.654252  | -2.936122 | 0.000000 |
| 52 | 7 | -0.081937 | -4.160076 | 0.000000 |
| 53 | 5 | -1.496670 | -3.983940 | 0.000000 |
| 54 | 7 | -2.714889 | -4.783358 | 0.000000 |
| 55 | 5 | -3.449110 | -5.992071 | 0.000000 |
| 56 | 7 | -4.882686 | -5.811936 | 0.000000 |
| 57 | 5 | -5.543765 | -4.543916 | 0.000000 |
| 58 | 1 | -5.471161 | -6.635116 | 0.000000 |
| 59 | 1 | -6.741813 | -4.533341 | 0.000000 |
| 60 | 1 | -3.986817 | 3.699506  | 0.000000 |
| 61 | 1 | 7.240306  | -1.574550 | 0.000000 |
| 62 | 1 | 3.986817  | -3.699506 | 0.000000 |
| 63 | 1 | 0.360340  | -5.070242 | 0.000000 |
| 64 | 1 | -2.963469 | -7.086252 | 0.000000 |

**Table S27.** The optimized Cartesian coordinates of the zigzag boron nitride ribbon ( $n \times m = 2 \times 3$ ) calculated at the B3LYP/6-31G(d) level of theory

| Center Number | Atomic Number | Coordinates (Angstroms) |           |          |
|---------------|---------------|-------------------------|-----------|----------|
|               |               | X                       | Y         | Z        |
| 1             | 5             | 3.364781                | 3.467175  | 0.000000 |
| 2             | 5             | 8.442092                | 7.356661  | 0.000000 |
| 3             | 7             | 7.005404                | 7.483525  | 0.000000 |
| 4             | 7             | 9.030842                | 6.053064  | 0.000000 |
| 5             | 5             | 8.291276                | 4.806524  | 0.000000 |
| 6             | 7             | 6.874579                | 4.968326  | 0.000000 |
| 7             | 5             | 6.239289                | 6.294647  | 0.000000 |
| 8             | 7             | 4.854382                | 5.833894  | 0.000000 |
| 9             | 5             | 5.494239                | 4.505241  | 0.000000 |
| 10            | 7             | 4.784209                | 3.258753  | 0.000000 |
| 11            | 7             | 2.712992                | 4.792962  | 0.000000 |
| 12            | 5             | 3.438905                | 6.027713  | 0.000000 |
| 13            | 1             | 6.579154                | 8.400581  | 0.000000 |
| 14            | 1             | 9.131878                | 8.334924  | 0.000000 |
| 15            | 1             | 10.041379               | 6.011231  | 0.000000 |
| 16            | 7             | 8.962911                | 3.499200  | 0.000000 |
| 17            | 5             | 8.233753                | 2.267807  | 0.000000 |
| 18            | 7             | 6.856000                | 1.781864  | 0.000000 |
| 19            | 5             | 5.432692                | 1.952609  | 0.000000 |
| 20            | 7             | 4.712997                | 0.712820  | 0.000000 |
| 21            | 7             | 6.785874                | -0.768213 | 0.000000 |
| 22            | 5             | 7.505914                | 0.462199  | 0.000000 |
| 23            | 7             | 8.880523                | 0.944216  | 0.000000 |
| 24            | 5             | 10.286799               | 0.793307  | 0.000000 |
| 25            | 7             | 11.014391               | 2.041473  | 0.000000 |
| 26            | 5             | 10.408526               | 3.336776  | 0.000000 |
| 27            | 1             | 12.025769               | 2.009039  | 0.000000 |
| 28            | 1             | 11.127544               | 4.295101  | 0.000000 |
| 29            | 1             | 2.913827                | 7.104607  | 0.000000 |
| 30            | 1             | 10.861046               | -0.257094 | 0.000000 |

|    |   |            |           |          |
|----|---|------------|-----------|----------|
| 31 | 5 | 1.497622   | 3.995858  | 0.000000 |
| 32 | 7 | 2.147737   | 2.670282  | 0.000000 |
| 33 | 5 | 1.426205   | 1.432007  | 0.000000 |
| 34 | 7 | 0.003076   | 1.611373  | 0.000000 |
| 35 | 5 | -0.648018  | 2.936246  | 0.000000 |
| 36 | 7 | 0.080740   | 4.162282  | 0.000000 |
| 37 | 5 | 3.495783   | -0.084836 | 0.000000 |
| 38 | 7 | 2.074251   | 0.120353  | 0.000000 |
| 39 | 5 | 1.370686   | -1.132132 | 0.000000 |
| 40 | 7 | 2.021656   | -2.460319 | 0.000000 |
| 41 | 5 | 3.438905   | -2.647649 | 0.000000 |
| 42 | 7 | 4.154686   | -1.409654 | 0.000000 |
| 43 | 5 | 5.367170   | -0.608156 | 0.000000 |
| 44 | 1 | -0.367634  | 5.069479  | 0.000000 |
| 45 | 1 | 3.968511   | -3.722240 | 0.000000 |
| 46 | 1 | 7.239083   | -1.672985 | 0.000000 |
| 47 | 7 | -6.856000  | -1.781864 | 0.000000 |
| 48 | 7 | -2.021656  | 2.460319  | 0.000000 |
| 49 | 5 | -3.438905  | 2.647649  | 0.000000 |
| 50 | 5 | -1.370686  | 1.132132  | 0.000000 |
| 51 | 7 | -2.074251  | -0.120353 | 0.000000 |
| 52 | 5 | -3.495783  | 0.084836  | 0.000000 |
| 53 | 7 | -4.154686  | 1.409654  | 0.000000 |
| 54 | 5 | -5.367170  | 0.608156  | 0.000000 |
| 55 | 7 | -4.712997  | -0.712820 | 0.000000 |
| 56 | 5 | -5.432692  | -1.952609 | 0.000000 |
| 57 | 5 | -7.505914  | -0.462199 | 0.000000 |
| 58 | 7 | -6.785874  | 0.768213  | 0.000000 |
| 59 | 1 | -3.968511  | 3.722240  | 0.000000 |
| 60 | 5 | -1.426205  | -1.432007 | 0.000000 |
| 61 | 7 | -2.147737  | -2.670282 | 0.000000 |
| 62 | 5 | -3.364781  | -3.467175 | 0.000000 |
| 63 | 7 | -4.784209  | -3.258753 | 0.000000 |
| 64 | 5 | -5.494239  | -4.505241 | 0.000000 |
| 65 | 5 | -3.438905  | -6.027713 | 0.000000 |
| 66 | 7 | -2.712992  | -4.792962 | 0.000000 |
| 67 | 5 | -1.497622  | -3.995858 | 0.000000 |
| 68 | 7 | -0.080740  | -4.162282 | 0.000000 |
| 69 | 5 | 0.648018   | -2.936246 | 0.000000 |
| 70 | 7 | -0.003076  | -1.611373 | 0.000000 |
| 71 | 1 | -7.239083  | 1.672985  | 0.000000 |
| 72 | 1 | 0.367634   | -5.069479 | 0.000000 |
| 73 | 7 | -8.880523  | -0.944216 | 0.000000 |
| 74 | 5 | -8.233753  | -2.267807 | 0.000000 |
| 75 | 7 | -8.962911  | -3.499200 | 0.000000 |
| 76 | 5 | -10.408526 | -3.336776 | 0.000000 |
| 77 | 7 | -11.014391 | -2.041473 | 0.000000 |
| 78 | 5 | -10.286799 | -0.793307 | 0.000000 |
| 79 | 7 | -6.874579  | -4.968326 | 0.000000 |
| 80 | 5 | -8.291276  | -4.806524 | 0.000000 |
| 81 | 7 | -9.030842  | -6.053064 | 0.000000 |
| 82 | 5 | -8.442092  | -7.356661 | 0.000000 |
| 83 | 7 | -7.005404  | -7.483525 | 0.000000 |
| 84 | 5 | -6.239289  | -6.294647 | 0.000000 |
| 85 | 7 | -4.854382  | -5.833894 | 0.000000 |
| 86 | 1 | -9.131878  | -8.334924 | 0.000000 |
| 87 | 1 | -10.041379 | -6.011231 | 0.000000 |
| 88 | 1 | -11.127544 | -4.295101 | 0.000000 |
| 89 | 1 | -12.025769 | -2.009039 | 0.000000 |
| 90 | 1 | -10.861046 | 0.257094  | 0.000000 |
| 91 | 1 | -6.579154  | -8.400581 | 0.000000 |
| 92 | 1 | -2.913827  | -7.104607 | 0.000000 |

**Table S28.** The optimized Cartesian coordinates of the zigzag boron nitride ribbon ( $n \times m = 2 \times 4$ ) calculated at the B3LYP/6-31G(d) level of theory

| Center Number | Atomic Number | Coordinates (Angstroms) |           |          |
|---------------|---------------|-------------------------|-----------|----------|
|               |               | X                       | Y         | Z        |
| 1             | 5             | 8.225586                | -2.271471 | 0.000000 |
| 2             | 5             | 14.397307               | -3.947954 | 0.000000 |
| 3             | 7             | 13.626510               | -2.728782 | 0.000000 |
| 4             | 7             | 13.718271               | -5.206905 | 0.000000 |

|    |   |           |            |          |
|----|---|-----------|------------|----------|
| 5  | 5 | 12.278721 | -5.375294  | 0.000000 |
| 6  | 7 | 11.547922 | -4.150841  | 0.000000 |
| 7  | 5 | 12.216740 | -2.841133  | 0.000000 |
| 8  | 7 | 11.010293 | -2.019725  | 0.000000 |
| 9  | 5 | 10.342399 | -3.334457  | 0.000000 |
| 10 | 7 | 8.920891  | -3.526400  | 0.000000 |
| 11 | 7 | 8.883668  | -0.948839  | 0.000000 |
| 12 | 5 | 10.305744 | -0.776804  | 0.000000 |
| 13 | 1 | 14.096671 | -1.833457  | 0.000000 |
| 14 | 1 | 15.593446 | -3.902832  | 0.000000 |
| 15 | 1 | 14.298131 | -6.035546  | 0.000000 |
| 16 | 7 | 11.646896 | -6.702351  | 0.000000 |
| 17 | 5 | 10.225831 | -6.869692  | 0.000000 |
| 18 | 7 | 9.003576  | -6.069279  | 0.000000 |
| 19 | 5 | 8.275840  | -4.834269  | 0.000000 |
| 20 | 7 | 6.853574  | -5.014289  | 0.000000 |
| 21 | 7 | 6.934248  | -7.560916  | 0.000000 |
| 22 | 5 | 8.349067  | -7.386603  | 0.000000 |
| 23 | 7 | 9.566128  | -8.186807  | 0.000000 |
| 24 | 5 | 10.299150 | -9.396455  | 0.000000 |
| 25 | 7 | 11.732701 | -9.217684  | 0.000000 |
| 26 | 5 | 12.394920 | -7.950271  | 0.000000 |
| 27 | 1 | 12.320447 | -10.041400 | 0.000000 |
| 28 | 1 | 13.592921 | -7.940693  | 0.000000 |
| 29 | 1 | 10.843373 | 0.293863   | 0.000000 |
| 30 | 1 | 9.812130  | -10.489972 | 0.000000 |
| 31 | 5 | 7.512522  | -0.466607  | 0.000000 |
| 32 | 7 | 6.853574  | -1.787975  | 0.000000 |
| 33 | 5 | 5.431590  | -1.965562  | 0.000000 |
| 34 | 7 | 4.710517  | -0.725817  | 0.000000 |
| 35 | 5 | 5.368318  | 0.595658   | 0.000000 |
| 36 | 7 | 6.784921  | 0.760625   | 0.000000 |
| 37 | 5 | 5.480937  | -4.530966  | 0.000000 |
| 38 | 7 | 4.781634  | -3.276348  | 0.000000 |
| 39 | 5 | 3.359403  | -3.476649  | 0.000000 |
| 40 | 7 | 2.698918  | -4.800039  | 0.000000 |
| 41 | 5 | 3.409572  | -6.040666  | 0.000000 |
| 42 | 7 | 4.827835  | -5.858688  | 0.000000 |
| 43 | 5 | 6.200798  | -6.335999  | 0.000000 |
| 44 | 1 | 7.233708  | 1.667582   | 0.000000 |
| 45 | 1 | 2.876092  | -7.113308  | 0.000000 |
| 46 | 1 | 6.490138  | -8.470152  | 0.000000 |
| 47 | 7 | -2.144182 | 2.675616   | 0.000000 |
| 48 | 7 | 4.156468  | 1.398337   | 0.000000 |
| 49 | 5 | 3.444780  | 2.638130   | 0.000000 |
| 50 | 5 | 3.495859  | 0.075262   | 0.000000 |
| 51 | 7 | 2.073426  | -0.125682  | 0.000000 |
| 52 | 5 | 1.372792  | 1.128280   | 0.000000 |
| 53 | 7 | 2.026698  | 2.454620   | 0.000000 |
| 54 | 5 | 0.654950  | 2.933839   | 0.000000 |
| 55 | 7 | -0.000371 | 1.611398   | 0.000000 |
| 56 | 5 | -1.423631 | 1.435351   | 0.000000 |
| 57 | 5 | -1.487515 | 3.997302   | 0.000000 |
| 58 | 7 | -0.070973 | 4.161491   | 0.000000 |
| 59 | 1 | 3.976903  | 3.711430   | 0.000000 |
| 60 | 5 | 1.423631  | -1.435351  | 0.000000 |
| 61 | 7 | 0.000371  | -1.611398  | 0.000000 |
| 62 | 5 | -1.372792 | -1.128280  | 0.000000 |
| 63 | 7 | -2.073426 | 0.125682   | 0.000000 |
| 64 | 5 | -3.495859 | -0.075262  | 0.000000 |
| 65 | 5 | -3.444780 | -2.638130  | 0.000000 |
| 66 | 7 | -2.026698 | -2.454620  | 0.000000 |
| 67 | 5 | -0.654950 | -2.933839  | 0.000000 |
| 68 | 7 | 0.070973  | -4.161491  | 0.000000 |
| 69 | 5 | 1.487515  | -3.997302  | 0.000000 |
| 70 | 7 | 2.144182  | -2.675616  | 0.000000 |
| 71 | 1 | 0.378945  | 5.067862   | 0.000000 |
| 72 | 1 | -0.378945 | -5.067862  | 0.000000 |
| 73 | 7 | -4.156468 | -1.398337  | 0.000000 |
| 74 | 1 | -3.976903 | -3.711430  | 0.000000 |
| 75 | 7 | -9.003576 | 6.069279   | 0.000000 |
| 76 | 7 | -2.698918 | 4.800039   | 0.000000 |
| 77 | 5 | -3.409572 | 6.040666   | 0.000000 |
| 78 | 5 | -3.359403 | 3.476649   | 0.000000 |
| 79 | 7 | -4.781634 | 3.276348   | 0.000000 |
| 80 | 5 | -5.480937 | 4.530966   | 0.000000 |
| 81 | 7 | -4.827835 | 5.858688   | 0.000000 |
| 82 | 5 | -6.200798 | 6.335999   | 0.000000 |
| 83 | 7 | -6.853574 | 5.014289   | 0.000000 |



|     |   |            |           |          |
|-----|---|------------|-----------|----------|
| 84  | 5 | -8.275840  | 4.834269  | 0.000000 |
| 85  | 5 | -8.349067  | 7.386603  | 0.000000 |
| 86  | 7 | -6.934248  | 7.560916  | 0.000000 |
| 87  | 1 | -2.876092  | 7.113308  | 0.000000 |
| 88  | 5 | -5.431590  | 1.965562  | 0.000000 |
| 89  | 7 | -6.853574  | 1.787975  | 0.000000 |
| 90  | 5 | -8.225586  | 2.271471  | 0.000000 |
| 91  | 7 | -8.920891  | 3.526400  | 0.000000 |
| 92  | 5 | -10.342399 | 3.334457  | 0.000000 |
| 93  | 5 | -10.305744 | 0.776804  | 0.000000 |
| 94  | 7 | -8.883668  | 0.948839  | 0.000000 |
| 95  | 5 | -7.512522  | 0.466607  | 0.000000 |
| 96  | 7 | -6.784921  | -0.760625 | 0.000000 |
| 97  | 5 | -5.368318  | -0.595658 | 0.000000 |
| 98  | 7 | -4.710517  | 0.725817  | 0.000000 |
| 99  | 1 | -6.490138  | 8.470152  | 0.000000 |
| 100 | 1 | -7.233708  | -1.667582 | 0.000000 |
| 101 | 7 | -9.566128  | 8.186807  | 0.000000 |
| 102 | 5 | -10.225831 | 6.869692  | 0.000000 |
| 103 | 7 | -11.646896 | 6.702351  | 0.000000 |
| 104 | 5 | -12.394920 | 7.950271  | 0.000000 |
| 105 | 7 | -11.732701 | 9.217684  | 0.000000 |
| 106 | 5 | -10.299150 | 9.396455  | 0.000000 |
| 107 | 7 | -11.547922 | 4.150841  | 0.000000 |
| 108 | 5 | -12.278721 | 5.375294  | 0.000000 |
| 109 | 7 | -13.718271 | 5.206905  | 0.000000 |
| 110 | 5 | -14.397307 | 3.947954  | 0.000000 |
| 111 | 7 | -13.626510 | 2.728782  | 0.000000 |
| 112 | 5 | -12.216740 | 2.841133  | 0.000000 |
| 113 | 7 | -11.010293 | 2.019725  | 0.000000 |
| 114 | 1 | -9.812130  | 10.489972 | 0.000000 |
| 115 | 1 | -14.096671 | 1.833457  | 0.000000 |
| 116 | 1 | -10.843373 | -0.293863 | 0.000000 |
| 117 | 1 | -13.592921 | 7.940693  | 0.000000 |
| 118 | 1 | -12.320447 | 10.041400 | 0.000000 |
| 119 | 1 | -14.298131 | 6.035546  | 0.000000 |
| 120 | 1 | -15.593446 | 3.902832  | 0.000000 |

**Table S29.** The optimized Cartesian coordinates of the zigzag boron nitride ribbon ( $n \times m = 2 \times 5$ ) calculated at the B3LYP/6-31G(d) level of theory

| Center<br>Number | Atomic<br>Number | Coordinates (Angstroms) |           |          |
|------------------|------------------|-------------------------|-----------|----------|
|                  |                  | X                       | Y         | Z        |
| 1                | 5                | -0.093135               | 12.311351 | 0.000000 |
| 2                | 5                | -0.546317               | 18.690923 | 0.000000 |
| 3                | 7                | -1.442843               | 17.561047 | 0.000000 |
| 4                | 7                | 0.866161                | 18.465058 | 0.000000 |
| 5                | 5                | 1.500070                | 17.161575 | 0.000000 |
| 6                | 7                | 0.585352                | 16.067714 | 0.000000 |
| 7                | 5                | -0.871619               | 16.267269 | 0.000000 |
| 8                | 7                | -1.249335               | 14.857417 | 0.000000 |
| 9                | 5                | 0.212022                | 14.660428 | 0.000000 |
| 10               | 7                | 0.862072                | 13.381721 | 0.000000 |
| 11               | 7                | -1.558839               | 12.496586 | 0.000000 |
| 12               | 5                | -2.190259               | 13.782370 | 0.000000 |
| 13               | 1                | -2.443159               | 17.709507 | 0.000000 |
| 14               | 1                | -0.983503               | 19.805215 | 0.000000 |
| 15               | 1                | 1.456913                | 19.286007 | 0.000000 |
| 16               | 7                | 2.961155                | 17.002882 | 0.000000 |
| 17               | 5                | 3.587894                | 15.716507 | 0.000000 |
| 18               | 7                | 3.235157                | 14.298671 | 0.000000 |
| 19               | 5                | 2.309435                | 13.204279 | 0.000000 |
| 20               | 7                | 2.948547                | 11.920899 | 0.000000 |
| 21               | 7                | 5.325856                | 12.836922 | 0.000000 |
| 22               | 5                | 4.694574                | 14.115145 | 0.000000 |
| 23               | 7                | 5.048784                | 15.528011 | 0.000000 |
| 24               | 5                | 5.948898                | 16.618968 | 0.000000 |
| 25               | 7                | 5.307345                | 17.913410 | 0.000000 |
| 26               | 5                | 3.892406                | 18.120666 | 0.000000 |
| 27               | 1                | 5.891167                | 18.739906 | 0.000000 |

|     |   |           |            |          |
|-----|---|-----------|------------|----------|
| 28  | 1 | 3.488067  | 19.248439  | 0.000000 |
| 29  | 1 | -3.378292 | 13.936982  | 0.000000 |
| 30  | 1 | 7.141828  | 16.519580  | 0.000000 |
| 31  | 5 | -1.561896 | 11.043182  | 0.000000 |
| 32  | 7 | -0.097137 | 10.856705  | 0.000000 |
| 33  | 5 | 0.539548  | 9.572832   | 0.000000 |
| 34  | 7 | -0.392858 | 8.483154   | 0.000000 |
| 35  | 5 | -1.857300 | 8.668510   | 0.000000 |
| 36  | 7 | -2.480311 | 9.951451   | 0.000000 |
| 37  | 5 | 2.944914  | 10.465762  | 0.000000 |
| 38  | 7 | 1.991293  | 9.391697   | 0.000000 |
| 39  | 5 | 2.649395  | 8.115095   | 0.000000 |
| 40  | 7 | 4.116468  | 7.927842   | 0.000000 |
| 41  | 5 | 5.053242  | 9.007937   | 0.000000 |
| 42  | 7 | 4.413781  | 10.286846  | 0.000000 |
| 43  | 5 | 4.411591  | 11.740415  | 0.000000 |
| 44  | 1 | -3.484581 | 10.075857  | 0.000000 |
| 45  | 1 | 6.241761  | 8.857771   | 0.000000 |
| 46  | 1 | 6.330741  | 12.717739  | 0.000000 |
| 47  | 7 | -1.342928 | 0.890102   | 0.000000 |
| 48  | 7 | -2.215648 | 7.259735   | 0.000000 |
| 49  | 5 | -3.151294 | 6.179016   | 0.000000 |
| 50  | 5 | -0.748834 | 7.072347   | 0.000000 |
| 51  | 7 | -0.090026 | 5.795722   | 0.000000 |
| 52  | 5 | -1.042621 | 4.720687   | 0.000000 |
| 53  | 7 | -2.510418 | 4.900737   | 0.000000 |
| 54  | 5 | -2.510418 | 3.447740   | 0.000000 |
| 55  | 7 | -1.045809 | 3.265114   | 0.000000 |
| 56  | 5 | -0.410256 | 1.979555   | 0.000000 |
| 57  | 5 | -2.807220 | 1.074236   | 0.000000 |
| 58  | 7 | -3.429610 | 2.357324   | 0.000000 |
| 59  | 1 | -4.339979 | 6.327633   | 0.000000 |
| 60  | 5 | 1.360554  | 5.614395   | 0.000000 |
| 61  | 7 | 1.996229  | 4.328670   | 0.000000 |
| 62  | 5 | 1.992937  | 2.873133   | 0.000000 |
| 63  | 7 | 1.040353  | 1.798005   | 0.000000 |
| 64  | 5 | 1.698641  | 0.521335   | 0.000000 |
| 65  | 5 | 4.101371  | 1.414795   | 0.000000 |
| 66  | 7 | 3.460769  | 2.692984   | 0.000000 |
| 67  | 5 | 3.460769  | 4.146102   | 0.000000 |
| 68  | 7 | 4.380160  | 5.236302   | 0.000000 |
| 69  | 5 | 3.757909  | 6.519527   | 0.000000 |
| 70  | 7 | 2.293656  | 6.703667   | 0.000000 |
| 71  | 1 | -4.433726 | 2.482815   | 0.000000 |
| 72  | 1 | 5.384248  | 5.110625   | 0.000000 |
| 73  | 7 | 3.165451  | 0.334100   | 0.000000 |
| 74  | 1 | 5.289999  | 1.265716   | 0.000000 |
| 75  | 7 | -2.293656 | -6.703667  | 0.000000 |
| 76  | 7 | -3.165451 | -0.334100  | 0.000000 |
| 77  | 5 | -4.101371 | -1.414795  | 0.000000 |
| 78  | 5 | -1.698641 | -0.521335  | 0.000000 |
| 79  | 7 | -1.040353 | -1.798005  | 0.000000 |
| 80  | 5 | -1.992937 | -2.873133  | 0.000000 |
| 81  | 7 | -3.460769 | -2.692984  | 0.000000 |
| 82  | 5 | -3.460769 | -4.146102  | 0.000000 |
| 83  | 7 | -1.996229 | -4.328670  | 0.000000 |
| 84  | 5 | -1.360554 | -5.614395  | 0.000000 |
| 85  | 5 | -3.757909 | -6.519527  | 0.000000 |
| 86  | 7 | -4.380160 | -5.236302  | 0.000000 |
| 87  | 1 | -5.289999 | -1.265716  | 0.000000 |
| 88  | 5 | 0.410256  | -1.979555  | 0.000000 |
| 89  | 7 | 1.045809  | -3.265114  | 0.000000 |
| 90  | 5 | 1.042621  | -4.720687  | 0.000000 |
| 91  | 7 | 0.090026  | -5.795722  | 0.000000 |
| 92  | 5 | 0.748834  | -7.072347  | 0.000000 |
| 93  | 5 | 3.151294  | -6.179016  | 0.000000 |
| 94  | 7 | 2.510418  | -4.900737  | 0.000000 |
| 95  | 5 | 2.510418  | -3.447740  | 0.000000 |
| 96  | 7 | 3.429610  | -2.357324  | 0.000000 |
| 97  | 5 | 2.807220  | -1.074236  | 0.000000 |
| 98  | 7 | 1.342928  | -0.890102  | 0.000000 |
| 99  | 1 | -5.384248 | -5.110625  | 0.000000 |
| 100 | 1 | 4.433726  | -2.482815  | 0.000000 |
| 101 | 7 | -4.116468 | -7.927842  | 0.000000 |
| 102 | 5 | -2.649395 | -8.115095  | 0.000000 |
| 103 | 7 | -1.991293 | -9.391697  | 0.000000 |
| 104 | 5 | -2.944914 | -10.465762 | 0.000000 |
| 105 | 7 | -4.413781 | -10.286846 | 0.000000 |
| 106 | 5 | -5.053242 | -9.007937  | 0.000000 |

|     |   |           |            |          |
|-----|---|-----------|------------|----------|
| 107 | 7 | 0.392858  | -8.483154  | 0.000000 |
| 108 | 5 | -0.539548 | -9.572832  | 0.000000 |
| 109 | 7 | 0.097137  | -10.856705 | 0.000000 |
| 110 | 5 | 1.561896  | -11.043182 | 0.000000 |
| 111 | 7 | 2.480311  | -9.951451  | 0.000000 |
| 112 | 5 | 1.857300  | -8.668510  | 0.000000 |
| 113 | 7 | 2.215648  | -7.259735  | 0.000000 |
| 114 | 1 | -6.241761 | -8.857771  | 0.000000 |
| 115 | 1 | 3.484581  | -10.075857 | 0.000000 |
| 116 | 1 | 4.339979  | -6.327633  | 0.000000 |
| 117 | 5 | -3.892406 | -18.120666 | 0.000000 |
| 118 | 5 | -4.411591 | -11.740415 | 0.000000 |
| 119 | 7 | -5.325856 | -12.836922 | 0.000000 |
| 120 | 7 | -2.948547 | -11.920899 | 0.000000 |
| 121 | 5 | -2.309435 | -13.204279 | 0.000000 |
| 122 | 7 | -3.235157 | -14.298671 | 0.000000 |
| 123 | 5 | -4.694574 | -14.115145 | 0.000000 |
| 124 | 7 | -5.048784 | -15.528011 | 0.000000 |
| 125 | 5 | -3.587894 | -15.716507 | 0.000000 |
| 126 | 7 | -2.961155 | -17.002882 | 0.000000 |
| 127 | 7 | -5.307345 | -17.913410 | 0.000000 |
| 128 | 5 | -5.948898 | -16.618968 | 0.000000 |
| 129 | 1 | -6.330741 | -12.717739 | 0.000000 |
| 130 | 7 | -0.862072 | -13.381721 | 0.000000 |
| 131 | 5 | -0.212022 | -14.660428 | 0.000000 |
| 132 | 7 | -0.585352 | -16.067714 | 0.000000 |
| 133 | 5 | -1.500070 | -17.161575 | 0.000000 |
| 134 | 7 | -0.866161 | -18.465058 | 0.000000 |
| 135 | 7 | 1.442843  | -17.561047 | 0.000000 |
| 136 | 5 | 0.871619  | -16.267269 | 0.000000 |
| 137 | 7 | 1.249335  | -14.857417 | 0.000000 |
| 138 | 5 | 2.190259  | -13.782370 | 0.000000 |
| 139 | 7 | 1.558839  | -12.496586 | 0.000000 |
| 140 | 5 | 0.093135  | -12.311351 | 0.000000 |
| 141 | 1 | -7.141828 | -16.519580 | 0.000000 |
| 142 | 1 | 3.378292  | -13.936982 | 0.000000 |
| 143 | 5 | 0.546317  | -18.690923 | 0.000000 |
| 144 | 1 | 2.443159  | -17.709507 | 0.000000 |
| 145 | 1 | -3.488067 | -19.248439 | 0.000000 |
| 146 | 1 | -5.891167 | -18.739906 | 0.000000 |
| 147 | 1 | -1.456913 | -19.286007 | 0.000000 |
| 148 | 1 | 0.983503  | -19.805215 | 0.000000 |

**Table S30.** The optimized Cartesian coordinates of the boron nitride compound ( $n \times m = 1 \times 1$ ) calculated at the B3LYP/6-31G(d) level of theory

| Center Number | Atomic Number | Coordinates (Angstroms) |           |          |
|---------------|---------------|-------------------------|-----------|----------|
|               |               | X                       | Y         | Z        |
| 1             | 5             | 1.407946                | 2.919405  | 0.000000 |
| 2             | 7             | 0.071415                | 2.374912  | 0.000000 |
| 3             | 7             | 2.524845                | 2.021223  | 0.000000 |
| 4             | 5             | 2.420910                | 0.579227  | 0.000000 |
| 5             | 7             | 1.096218                | 0.076702  | 0.000000 |
| 6             | 5             | -0.071415               | 0.966897  | 0.000000 |
| 7             | 7             | -1.096218               | -0.076702 | 0.000000 |
| 8             | 5             | 0.071415                | -0.966897 | 0.000000 |
| 9             | 7             | -0.071415               | -2.374912 | 0.000000 |
| 10            | 5             | -1.407946               | -2.919405 | 0.000000 |
| 11            | 7             | -2.524845               | -2.021223 | 0.000000 |
| 12            | 5             | -2.420910               | -0.579227 | 0.000000 |
| 13            | 1             | -0.724448               | 2.998602  | 0.000000 |
| 14            | 1             | 1.573379                | 4.104867  | 0.000000 |
| 15            | 1             | 3.448882                | 2.433363  | 0.000000 |
| 16            | 1             | -1.573379               | -4.104867 | 0.000000 |
| 17            | 1             | -3.448882               | -2.433363 | 0.000000 |
| 18            | 1             | -3.404363               | 0.104542  | 0.000000 |
| 19            | 1             | 3.404363                | -0.104542 | 0.000000 |
| 20            | 1             | 0.724448                | -2.998602 | 0.000000 |

**Table S31.** The optimized Cartesian coordinates of the armchair boron nitride ribbon ( $n \times m = 2 \times 1$ ) calculated at the B3LYP/6–31G(d) level of theory

| Center Number | Atomic Number | Coordinates (Angstroms) |           |          |
|---------------|---------------|-------------------------|-----------|----------|
|               |               | X                       | Y         | Z        |
| 1             | 5             | -1.482117               | 4.008001  | 0.000000 |
| 2             | 7             | -0.041352               | 4.091529  | 0.000000 |
| 3             | 7             | -2.105241               | 2.721934  | 0.000000 |
| 4             | 5             | -1.399994               | 1.455054  | 0.000000 |
| 5             | 7             | 0.021044                | 1.572452  | 0.000000 |
| 6             | 5             | 0.684809                | 2.879257  | 0.000000 |
| 7             | 7             | 2.059375                | 2.382234  | 0.000000 |
| 8             | 5             | 1.395599                | 1.071889  | 0.000000 |
| 9             | 7             | 2.105241                | -0.169403 | 0.000000 |
| 10            | 5             | 3.553388                | -0.033248 | 0.000000 |
| 11            | 7             | 4.177918                | 1.251975  | 0.000000 |
| 12            | 5             | 3.466463                | 2.511320  | 0.000000 |
| 13            | 1             | 0.413399                | 4.994575  | 0.000000 |
| 14            | 1             | -2.142246               | 5.006258  | 0.000000 |
| 15            | 1             | -3.116576               | 2.705230  | 0.000000 |
| 16            | 7             | -2.105241               | 0.169403  | 0.000000 |
| 17            | 5             | -1.395599               | -1.071889 | 0.000000 |
| 18            | 7             | -0.021044               | -1.572452 | 0.000000 |
| 19            | 5             | 1.399994                | -1.455054 | 0.000000 |
| 20            | 7             | 2.105241                | -2.721934 | 0.000000 |
| 21            | 5             | 1.482117                | -4.008001 | 0.000000 |
| 22            | 7             | 0.041352                | -4.091529 | 0.000000 |
| 23            | 5             | -0.684809               | -2.879257 | 0.000000 |
| 24            | 7             | -2.059375               | -2.382234 | 0.000000 |
| 25            | 5             | -3.466463               | -2.511320 | 0.000000 |
| 26            | 7             | -4.177918               | -1.251975 | 0.000000 |
| 27            | 5             | -3.553388               | 0.033248  | 0.000000 |
| 28            | 1             | -5.189539               | -1.271040 | 0.000000 |
| 29            | 1             | -4.254421               | 1.005052  | 0.000000 |
| 30            | 1             | 2.142246                | -5.006258 | 0.000000 |
| 31            | 1             | 3.116576                | -2.705230 | 0.000000 |
| 32            | 1             | 4.254421                | -1.005052 | 0.000000 |
| 33            | 1             | 5.189539                | 1.271040  | 0.000000 |
| 34            | 1             | 4.058034                | 3.552233  | 0.000000 |
| 35            | 1             | -0.413399               | -4.994575 | 0.000000 |
| 36            | 1             | -4.058034               | -3.552233 | 0.000000 |

**Table S32.** The optimized Cartesian coordinates of the armchair boron nitride ribbon ( $n \times m = 3 \times 1$ ) calculated at the B3LYP/6–31G(d) level of theory

| Center Number | Atomic Number | Coordinates (Angstroms) |           |          |
|---------------|---------------|-------------------------|-----------|----------|
|               |               | X                       | Y         | Z        |
| 1             | 7             | 6.038049                | -1.103074 | 0.000000 |
| 2             | 5             | 5.838226                | -2.536335 | 0.000000 |
| 3             | 5             | 4.985794                | -0.136756 | 0.000000 |
| 4             | 7             | 4.482407                | -2.932688 | 0.000000 |
| 5             | 7             | 3.588474                | -0.542032 | 0.000000 |
| 6             | 5             | 3.384225                | -1.957591 | 0.000000 |
| 7             | 7             | 3.148469                | -5.291395 | 0.000000 |
| 8             | 5             | 1.775322                | -5.736998 | 0.000000 |
| 9             | 5             | 3.384225                | -3.898248 | 0.000000 |
| 10            | 7             | 0.726938                | -4.765984 | 0.000000 |
| 11            | 7             | 2.289300                | -2.924026 | 0.000000 |
| 12            | 5             | 0.921788                | -3.328724 | 0.000000 |
| 13            | 1             | 1.524000                | -6.907210 | 0.000000 |
| 14            | 1             | -0.221026               | -5.118869 | 0.000000 |
| 15            | 5             | 1.599059                | 2.791125  | 0.000000 |
| 16            | 7             | -0.726938               | 4.765984  | 0.000000 |
| 17            | 5             | -0.921788               | 3.328724  | 0.000000 |
| 18            | 7             | 0.200817                | 2.388211  | 0.000000 |
| 19            | 5             | 0.003389                | 0.972696  | 0.000000 |

|    |   |           |           |          |
|----|---|-----------|-----------|----------|
| 20 | 7 | 1.094879  | -0.005594 | 0.000000 |
| 21 | 7 | 2.649833  | 1.830153  | 0.000000 |
| 22 | 5 | -1.775322 | 5.736998  | 0.000000 |
| 23 | 7 | -2.289300 | 2.924026  | 0.000000 |
| 24 | 7 | -3.148469 | 5.291395  | 0.000000 |
| 25 | 5 | -3.384225 | 3.898248  | 0.000000 |
| 26 | 5 | 2.461013  | 0.391882  | 0.000000 |
| 27 | 5 | -2.461013 | -0.391882 | 0.000000 |
| 28 | 7 | -1.094879 | 0.005594  | 0.000000 |
| 29 | 7 | -0.200817 | -2.388211 | 0.000000 |
| 30 | 5 | -1.599059 | -2.791125 | 0.000000 |
| 31 | 7 | -2.649833 | -1.830153 | 0.000000 |
| 32 | 7 | -3.588474 | 0.542032  | 0.000000 |
| 33 | 5 | -4.985794 | 0.136756  | 0.000000 |
| 34 | 5 | -3.384225 | 1.957591  | 0.000000 |
| 35 | 7 | -6.038049 | 1.103074  | 0.000000 |
| 36 | 7 | -4.482407 | 2.932688  | 0.000000 |
| 37 | 5 | -5.838226 | 2.536335  | 0.000000 |
| 38 | 5 | -0.003389 | -0.972696 | 0.000000 |
| 39 | 1 | -3.899919 | 5.968190  | 0.000000 |
| 40 | 1 | -1.895593 | -3.952429 | 0.000000 |
| 41 | 1 | -3.594941 | -2.190869 | 0.000000 |
| 42 | 1 | -5.280522 | -1.025055 | 0.000000 |
| 43 | 1 | -6.986231 | 0.749700  | 0.000000 |
| 44 | 1 | -6.771157 | 3.286729  | 0.000000 |
| 45 | 1 | 6.986231  | -0.749700 | 0.000000 |
| 46 | 1 | 6.771157  | -3.286729 | 0.000000 |
| 47 | 1 | 5.280522  | 1.025055  | 0.000000 |
| 48 | 1 | 3.899919  | -5.968190 | 0.000000 |
| 49 | 1 | 1.895593  | 3.952429  | 0.000000 |
| 50 | 1 | 0.221026  | 5.118869  | 0.000000 |
| 51 | 1 | 3.594941  | 2.190869  | 0.000000 |
| 52 | 1 | -1.524000 | 6.907210  | 0.000000 |

**Table S33.** The optimized Cartesian coordinates of the armchair boron nitride ribbon ( $n \times m = 4 \times 1$ ) calculated at the B3LYP/6-31G(d) level of theory

| Center Number | Atomic Number | Coordinates (Angstroms) |           |          |
|---------------|---------------|-------------------------|-----------|----------|
|               |               | X                       | Y         | Z        |
| 1             | 5             | 0.482353                | 7.979241  | 0.000000 |
| 2             | 7             | 1.922045                | 8.086388  | 0.000000 |
| 3             | 7             | -0.120402               | 6.683710  | 0.000000 |
| 4             | 5             | 0.604050                | 5.427239  | 0.000000 |
| 5             | 7             | 2.023398                | 5.569405  | 0.000000 |
| 6             | 5             | 2.667109                | 6.886035  | 0.000000 |
| 7             | 7             | 4.049700                | 6.408811  | 0.000000 |
| 8             | 5             | 3.403163                | 5.090137  | 0.000000 |
| 9             | 7             | 4.128565                | 3.857375  | 0.000000 |
| 10            | 5             | 5.575221                | 4.011383  | 0.000000 |
| 11            | 7             | 6.182572                | 5.304324  | 0.000000 |
| 12            | 5             | 5.454821                | 6.555167  | 0.000000 |
| 13            | 1             | 2.361814                | 8.996786  | 0.000000 |
| 14            | 1             | -0.193361               | 8.967084  | 0.000000 |
| 15            | 1             | -1.131368               | 6.651270  | 0.000000 |
| 16            | 7             | -0.079359               | 4.132111  | 0.000000 |
| 17            | 5             | 0.639757                | 2.897783  | 0.000000 |
| 18            | 7             | 2.023398                | 2.419391  | 0.000000 |
| 19            | 5             | 3.438100                | 2.566640  | 0.000000 |
| 20            | 7             | 4.156700                | 1.305706  | 0.000000 |
| 21            | 5             | 3.547294                | 0.019113  | 0.000000 |
| 22            | 7             | 2.099990                | -0.135161 | 0.000000 |
| 23            | 5             | 1.383128                | 1.101327  | 0.000000 |
| 24            | 7             | 0.001754                | 1.578419  | 0.000000 |
| 25            | 5             | -1.413087               | 1.425963  | 0.000000 |
| 26            | 7             | -2.133349               | 2.685830  | 0.000000 |
| 27            | 5             | -1.526263               | 3.973702  | 0.000000 |
| 28            | 1             | -3.144589               | 2.660624  | 0.000000 |
| 29            | 1             | -2.241057               | 4.935675  | 0.000000 |
| 30            | 7             | -2.099990               | 0.135161  | 0.000000 |
| 31            | 5             | -1.383128               | -1.101327 | 0.000000 |

|    |   |           |           |          |
|----|---|-----------|-----------|----------|
| 32 | 7 | -0.001754 | -1.578419 | 0.000000 |
| 33 | 5 | 1.413087  | -1.425963 | 0.000000 |
| 34 | 1 | 4.259690  | -0.944703 | 0.000000 |
| 35 | 7 | 2.133349  | -2.685830 | 0.000000 |
| 36 | 5 | 1.526263  | -3.973702 | 0.000000 |
| 37 | 7 | 0.079359  | -4.132111 | 0.000000 |
| 38 | 5 | -0.639757 | -2.897783 | 0.000000 |
| 39 | 7 | -2.023398 | -2.419391 | 0.000000 |
| 40 | 5 | -3.438100 | -2.566640 | 0.000000 |
| 41 | 7 | -4.156700 | -1.305706 | 0.000000 |
| 42 | 5 | -3.547294 | -0.019113 | 0.000000 |
| 43 | 1 | -4.259690 | 0.944703  | 0.000000 |
| 44 | 1 | -5.168005 | -1.329316 | 0.000000 |
| 45 | 1 | 2.241057  | -4.935675 | 0.000000 |
| 46 | 1 | 3.144589  | -2.660624 | 0.000000 |
| 47 | 1 | 5.168005  | 1.329316  | 0.000000 |
| 48 | 1 | 6.287992  | 3.047873  | 0.000000 |
| 49 | 1 | 7.193846  | 5.336724  | 0.000000 |
| 50 | 1 | 6.034040  | 7.602926  | 0.000000 |
| 51 | 5 | -5.575221 | -4.011383 | 0.000000 |
| 52 | 7 | -4.128565 | -3.857375 | 0.000000 |
| 53 | 7 | -6.182572 | -5.304324 | 0.000000 |
| 54 | 5 | -5.454821 | -6.555167 | 0.000000 |
| 55 | 7 | -4.049700 | -6.408811 | 0.000000 |
| 56 | 5 | -3.403163 | -5.090137 | 0.000000 |
| 57 | 7 | -2.023398 | -5.569405 | 0.000000 |
| 58 | 5 | -2.667109 | -6.886035 | 0.000000 |
| 59 | 7 | -1.922045 | -8.086388 | 0.000000 |
| 60 | 5 | -0.482353 | -7.979241 | 0.000000 |
| 61 | 7 | 0.120402  | -6.683710 | 0.000000 |
| 62 | 5 | -0.604050 | -5.427239 | 0.000000 |
| 63 | 1 | -6.287992 | -3.047873 | 0.000000 |
| 64 | 1 | -7.193846 | -5.336724 | 0.000000 |
| 65 | 1 | 0.193361  | -8.967084 | 0.000000 |
| 66 | 1 | 1.131368  | -6.651270 | 0.000000 |
| 67 | 1 | -6.034040 | -7.602926 | 0.000000 |
| 68 | 1 | -2.361814 | -8.996786 | 0.000000 |

**Table S34.** The optimized Cartesian coordinates of the armchair boron nitride ribbon ( $n \times m = 5 \times 1$ ) calculated at the B3LYP/6-31G(d) level of theory

| Center<br>Number | Atomic<br>Number | Coordinates (Angstroms) |           |          |
|------------------|------------------|-------------------------|-----------|----------|
|                  |                  | X                       | Y         | Z        |
| 1                | 5                | -3.175753               | 9.574753  | 0.000000 |
| 2                | 7                | -1.939901               | 10.320974 | 0.000000 |
| 3                | 7                | -3.127890               | 8.146696  | 0.000000 |
| 4                | 5                | -1.913755               | 7.353383  | 0.000000 |
| 5                | 7                | -0.711962               | 8.121552  | 0.000000 |
| 6                | 5                | -0.732575               | 9.587072  | 0.000000 |
| 7                | 7                | 0.716382                | 9.785983  | 0.000000 |
| 8                | 5                | 0.735464                | 8.317450  | 0.000000 |
| 9                | 7                | 1.939901                | 7.545891  | 0.000000 |
| 10               | 5                | 3.160691                | 8.337406  | 0.000000 |
| 11               | 7                | 3.117955                | 9.765250  | 0.000000 |
| 12               | 5                | 1.903313                | 10.551928 | 0.000000 |
| 13               | 1                | -1.958907               | 11.332022 | 0.000000 |
| 14               | 1                | -4.224992               | 10.150631 | 0.000000 |
| 15               | 1                | -4.015004               | 7.660653  | 0.000000 |
| 16               | 7                | -1.938123               | 5.889150  | 0.000000 |
| 17               | 5                | -0.738808               | 5.113090  | 0.000000 |
| 18               | 7                | 0.711962                | 5.311531  | 0.000000 |
| 19               | 5                | 1.907270                | 6.082379  | 0.000000 |
| 20               | 7                | 3.118368                | 5.282509  | 0.000000 |
| 21               | 5                | 3.156343                | 3.859494  | 0.000000 |
| 22               | 7                | 1.934997                | 3.067693  | 0.000000 |
| 23               | 5                | 0.736220                | 3.846445  | 0.000000 |
| 24               | 7                | -0.711845               | 3.647854  | 0.000000 |
| 25               | 5                | -1.905385               | 2.872508  | 0.000000 |
| 26               | 7                | -3.117085               | 3.670909  | 0.000000 |
| 27               | 5                | -3.157386               | 5.094056  | 0.000000 |

|    |   |           |            |          |
|----|---|-----------|------------|----------|
| 28 | 1 | -4.007783 | 3.191244   | 0.000000 |
| 29 | 1 | -4.229864 | 5.629083   | 0.000000 |
| 30 | 7 | -1.935247 | 1.410751   | 0.000000 |
| 31 | 5 | -0.736901 | 0.632828   | 0.000000 |
| 32 | 7 | 0.711546  | 0.831899   | 0.000000 |
| 33 | 5 | 1.905032  | 1.606010   | 0.000000 |
| 34 | 1 | 4.227547  | 3.321653   | 0.000000 |
| 35 | 7 | 3.116651  | 0.805984   | 0.000000 |
| 36 | 5 | 3.155902  | -0.616971  | 0.000000 |
| 37 | 7 | 1.935247  | -1.410751  | 0.000000 |
| 38 | 5 | 0.736901  | -0.632828  | 0.000000 |
| 39 | 7 | -0.711546 | -0.831899  | 0.000000 |
| 40 | 5 | -1.905032 | -1.606010  | 0.000000 |
| 41 | 7 | -3.116651 | -0.805984  | 0.000000 |
| 42 | 5 | -3.155902 | 0.616971   | 0.000000 |
| 43 | 1 | -4.227543 | 1.153928   | 0.000000 |
| 44 | 1 | -4.007787 | -1.284849  | 0.000000 |
| 45 | 1 | 4.227543  | -1.153928  | 0.000000 |
| 46 | 1 | 4.007787  | 1.284849   | 0.000000 |
| 47 | 1 | 4.009758  | 5.760887   | 0.000000 |
| 48 | 1 | 4.232265  | 7.800440   | 0.000000 |
| 49 | 1 | 4.005442  | 10.251373  | 0.000000 |
| 50 | 1 | 1.945681  | 11.748420  | 0.000000 |
| 51 | 5 | -3.156343 | -3.859494  | 0.000000 |
| 52 | 7 | -1.934997 | -3.067693  | 0.000000 |
| 53 | 7 | -3.118368 | -5.282509  | 0.000000 |
| 54 | 5 | -1.907270 | -6.082379  | 0.000000 |
| 55 | 7 | -0.711962 | -5.311531  | 0.000000 |
| 56 | 5 | -0.736220 | -3.846445  | 0.000000 |
| 57 | 7 | 0.711845  | -3.647854  | 0.000000 |
| 58 | 5 | 0.738808  | -5.113090  | 0.000000 |
| 59 | 7 | 1.938123  | -5.889150  | 0.000000 |
| 60 | 5 | 3.157386  | -5.094056  | 0.000000 |
| 61 | 7 | 3.117085  | -3.670909  | 0.000000 |
| 62 | 5 | 1.905385  | -2.872508  | 0.000000 |
| 63 | 1 | -4.227547 | -3.321653  | 0.000000 |
| 64 | 1 | -4.009758 | -5.760887  | 0.000000 |
| 65 | 7 | -1.939901 | -7.545891  | 0.000000 |
| 66 | 5 | -0.735464 | -8.317450  | 0.000000 |
| 67 | 7 | 0.711962  | -8.121552  | 0.000000 |
| 68 | 5 | 1.913755  | -7.353383  | 0.000000 |
| 69 | 7 | 3.127890  | -8.146696  | 0.000000 |
| 70 | 5 | 3.175753  | -9.574753  | 0.000000 |
| 71 | 7 | 1.939901  | -10.320974 | 0.000000 |
| 72 | 5 | 0.732575  | -9.587072  | 0.000000 |
| 73 | 7 | -0.716382 | -9.785983  | 0.000000 |
| 74 | 5 | -1.903313 | -10.551928 | 0.000000 |
| 75 | 7 | -3.117955 | -9.765250  | 0.000000 |
| 76 | 5 | -3.160691 | -8.337406  | 0.000000 |
| 77 | 1 | -4.005442 | -10.251373 | 0.000000 |
| 78 | 1 | -4.232265 | -7.800440  | 0.000000 |
| 79 | 1 | 4.224992  | -10.150631 | 0.000000 |
| 80 | 1 | 4.015004  | -7.660653  | 0.000000 |
| 81 | 1 | 4.229864  | -5.629083  | 0.000000 |
| 82 | 1 | 4.007783  | -3.191244  | 0.000000 |
| 83 | 1 | 1.958907  | -11.332022 | 0.000000 |
| 84 | 1 | -1.945681 | -11.748420 | 0.000000 |

**Table S35.** The optimized Cartesian coordinates of the armchair boron nitride ribbon ( $n \times m = 6 \times 1$ ) calculated at the B3LYP/6-31G(d) level of theory

| Center Number | Atomic Number | Coordinates (Angstroms) |           |          |
|---------------|---------------|-------------------------|-----------|----------|
|               |               | X                       | Y         | Z        |
| 1             | 5             | -3.179178               | 11.813580 | 0.000000 |
| 2             | 7             | -1.943216               | 12.559773 | 0.000000 |
| 3             | 7             | -3.131388               | 10.385504 | 0.000000 |
| 4             | 5             | -1.917212               | 9.592056  | 0.000000 |
| 5             | 7             | -0.715519               | 10.360362 | 0.000000 |
| 6             | 5             | -0.735969               | 11.825895 | 0.000000 |
| 7             | 7             | 0.712894                | 12.024996 | 0.000000 |
| 8             | 5             | 0.731957                | 10.556590 | 0.000000 |
| 9             | 7             | 1.936705                | 9.785381  | 0.000000 |

|    |   |           |            |          |
|----|---|-----------|------------|----------|
| 10 | 5 | 3.157163  | 10.577445  | 0.000000 |
| 11 | 7 | 3.114417  | 12.005247  | 0.000000 |
| 12 | 5 | 1.899411  | 12.791347  | 0.000000 |
| 13 | 1 | -1.962415 | 13.570918  | 0.000000 |
| 14 | 1 | -4.228234 | 12.389834  | 0.000000 |
| 15 | 1 | -4.018751 | 9.899836   | 0.000000 |
| 16 | 7 | -1.941122 | 8.127757   | 0.000000 |
| 17 | 5 | -0.741442 | 7.352029   | 0.000000 |
| 18 | 7 | 0.709236  | 7.550871   | 0.000000 |
| 19 | 5 | 1.904337  | 8.321991   | 0.000000 |
| 20 | 7 | 3.115649  | 7.522478   | 0.000000 |
| 21 | 5 | 3.153874  | 6.099626   | 0.000000 |
| 22 | 7 | 1.932787  | 5.307328   | 0.000000 |
| 23 | 5 | 0.733625  | 6.085741   | 0.000000 |
| 24 | 7 | -0.714252 | 5.886643   | 0.000000 |
| 25 | 5 | -1.907504 | 5.110903   | 0.000000 |
| 26 | 7 | -3.119448 | 5.908967   | 0.000000 |
| 27 | 5 | -3.160108 | 7.332039   | 0.000000 |
| 28 | 1 | -4.010151 | 5.429237   | 0.000000 |
| 29 | 1 | -4.232791 | 7.866375   | 0.000000 |
| 30 | 7 | -1.936776 | 3.649100   | 0.000000 |
| 31 | 5 | -0.737985 | 2.871582   | 0.000000 |
| 32 | 7 | 0.710406  | 3.071129   | 0.000000 |
| 33 | 5 | 1.903436  | 3.845756   | 0.000000 |
| 34 | 1 | 4.225242  | 5.562320   | 0.000000 |
| 35 | 7 | 3.115638  | 3.046451   | 0.000000 |
| 36 | 5 | 3.155557  | 1.623729   | 0.000000 |
| 37 | 7 | 1.935308  | 0.829198   | 0.000000 |
| 38 | 5 | 0.735969  | 1.606308   | 0.000000 |
| 39 | 7 | -0.712386 | 1.406796   | 0.000000 |
| 40 | 5 | -1.905874 | 0.632264   | 0.000000 |
| 41 | 7 | -3.117642 | 1.431901   | 0.000000 |
| 42 | 5 | -3.157164 | 2.854753   | 0.000000 |
| 43 | 1 | -4.228982 | 3.391080   | 0.000000 |
| 44 | 1 | -4.008752 | 0.952875   | 0.000000 |
| 45 | 1 | 4.227379  | 1.087283   | 0.000000 |
| 46 | 1 | 4.006611  | 3.525704   | 0.000000 |
| 47 | 1 | 4.007064  | 8.000879   | 0.000000 |
| 48 | 1 | 4.228964  | 10.041082  | 0.000000 |
| 49 | 1 | 4.001712  | 12.491795  | 0.000000 |
| 50 | 1 | 1.941475  | 13.987849  | 0.000000 |
| 51 | 5 | -3.155557 | -1.623729  | 0.000000 |
| 52 | 7 | -1.935308 | -0.829198  | 0.000000 |
| 53 | 7 | -3.115638 | -3.046451  | 0.000000 |
| 54 | 5 | -1.903436 | -3.845756  | 0.000000 |
| 55 | 7 | -0.710406 | -3.071129  | 0.000000 |
| 56 | 5 | -0.735969 | -1.606308  | 0.000000 |
| 57 | 7 | 0.712386  | -1.406796  | 0.000000 |
| 58 | 5 | 0.737985  | -2.871582  | 0.000000 |
| 59 | 7 | 1.936776  | -3.649100  | 0.000000 |
| 60 | 5 | 3.157164  | -2.854753  | 0.000000 |
| 61 | 7 | 3.117642  | -1.431901  | 0.000000 |
| 62 | 5 | 1.905874  | -0.632264  | 0.000000 |
| 63 | 1 | -4.227379 | -1.087283  | 0.000000 |
| 64 | 1 | -4.006611 | -3.525704  | 0.000000 |
| 65 | 7 | -1.932787 | -5.307328  | 0.000000 |
| 66 | 5 | -0.733625 | -6.085741  | 0.000000 |
| 67 | 7 | 0.714252  | -5.886643  | 0.000000 |
| 68 | 5 | 1.907504  | -5.110903  | 0.000000 |
| 69 | 7 | 3.119448  | -5.908967  | 0.000000 |
| 70 | 5 | 3.160108  | -7.332039  | 0.000000 |
| 71 | 7 | 1.941122  | -8.127757  | 0.000000 |
| 72 | 5 | 0.741442  | -7.352029  | 0.000000 |
| 73 | 7 | -0.709236 | -7.550871  | 0.000000 |
| 74 | 5 | -1.904337 | -8.321991  | 0.000000 |
| 75 | 7 | -3.115649 | -7.522478  | 0.000000 |
| 76 | 5 | -3.153874 | -6.099626  | 0.000000 |
| 77 | 1 | -4.007064 | -8.000879  | 0.000000 |
| 78 | 1 | -4.225242 | -5.562320  | 0.000000 |
| 79 | 7 | -1.936705 | -9.785381  | 0.000000 |
| 80 | 5 | -0.731957 | -10.556590 | 0.000000 |
| 81 | 7 | 0.715519  | -10.360362 | 0.000000 |
| 82 | 5 | 1.917212  | -9.592056  | 0.000000 |
| 83 | 1 | 4.232791  | -7.866375  | 0.000000 |
| 84 | 7 | 3.131388  | -10.385504 | 0.000000 |
| 85 | 5 | 3.179178  | -11.813580 | 0.000000 |
| 86 | 7 | 1.943216  | -12.559773 | 0.000000 |
| 87 | 5 | 0.735969  | -11.825895 | 0.000000 |
| 88 | 7 | -0.712894 | -12.024996 | 0.000000 |



|     |   |           |            |          |
|-----|---|-----------|------------|----------|
| 89  | 5 | -1.899411 | -12.791347 | 0.000000 |
| 90  | 7 | -3.114417 | -12.005247 | 0.000000 |
| 91  | 5 | -3.157163 | -10.577445 | 0.000000 |
| 92  | 1 | -4.228964 | -10.041082 | 0.000000 |
| 93  | 1 | -4.001712 | -12.491795 | 0.000000 |
| 94  | 1 | -1.941475 | -13.987849 | 0.000000 |
| 95  | 1 | 1.962415  | -13.570918 | 0.000000 |
| 96  | 1 | 4.228234  | -12.389834 | 0.000000 |
| 97  | 1 | 4.018751  | -9.899836  | 0.000000 |
| 98  | 1 | 4.010151  | -5.429237  | 0.000000 |
| 99  | 1 | 4.228982  | -3.391080  | 0.000000 |
| 100 | 1 | 4.008752  | -0.952875  | 0.000000 |

**Table S36.** The optimized Cartesian coordinates of the armchair boron nitride ribbon ( $n \times m = 7 \times 1$ ) calculated at the B3LYP/6-31G(d) level of theory

| Center Number | Atomic Number | Coordinates (Angstroms) |           |          |
|---------------|---------------|-------------------------|-----------|----------|
|               |               | X                       | Y         | Z        |
| 1             | 5             | -3.173781               | 14.053905 | 0.000000 |
| 2             | 7             | -1.937763               | 14.799572 | 0.000000 |
| 3             | 7             | -3.126435               | 12.625629 | 0.000000 |
| 4             | 5             | -1.912548               | 11.831962 | 0.000000 |
| 5             | 7             | -0.710584               | 12.600062 | 0.000000 |
| 6             | 5             | -0.730424               | 14.065629 | 0.000000 |
| 7             | 7             | 0.718347                | 14.264141 | 0.000000 |
| 8             | 5             | 0.736850                | 12.795523 | 0.000000 |
| 9             | 7             | 1.941179                | 12.023645 | 0.000000 |
| 10            | 5             | 3.162135                | 12.815078 | 0.000000 |
| 11            | 7             | 3.119878                | 14.242860 | 0.000000 |
| 12            | 5             | 1.905433                | 15.029819 | 0.000000 |
| 13            | 1             | -1.956607               | 15.810416 | 0.000000 |
| 14            | 1             | -4.222960               | 14.629916 | 0.000000 |
| 15            | 1             | -4.013870               | 12.140179 | 0.000000 |
| 16            | 7             | -1.936936               | 10.367701 | 0.000000 |
| 17            | 5             | -0.737664               | 9.591377  | 0.000000 |
| 18            | 7             | 0.713007                | 9.789211  | 0.000000 |
| 19            | 5             | 1.908438                | 10.560019 | 0.000000 |
| 20            | 7             | 3.119355                | 9.759920  | 0.000000 |
| 21            | 5             | 3.156848                | 8.336857  | 0.000000 |
| 22            | 7             | 1.935598                | 7.545328  | 0.000000 |
| 23            | 5             | 0.736601                | 8.324099  | 0.000000 |
| 24            | 7             | -0.711201               | 8.125800  | 0.000000 |
| 25            | 5             | -1.904952               | 7.350913  | 0.000000 |
| 26            | 7             | -3.116457               | 8.149590  | 0.000000 |
| 27            | 5             | -3.156394               | 9.572725  | 0.000000 |
| 28            | 1             | -4.007326               | 7.670262  | 0.000000 |
| 29            | 1             | -4.228748               | 10.107878 | 0.000000 |
| 30            | 7             | -1.934852               | 5.889034  | 0.000000 |
| 31            | 5             | -0.736600               | 5.110947  | 0.000000 |
| 32            | 7             | 0.712005                | 5.309699  | 0.000000 |
| 33            | 5             | 1.905470                | 6.083676  | 0.000000 |
| 34            | 1             | 4.228196                | 7.799310  | 0.000000 |
| 35            | 7             | 3.117283                | 5.283761  | 0.000000 |
| 36            | 5             | 3.156575                | 3.860990  | 0.000000 |
| 37            | 7             | 1.935884                | 3.067184  | 0.000000 |
| 38            | 5             | 0.736982                | 3.844919  | 0.000000 |
| 39            | 7             | -0.711472               | 3.646119  | 0.000000 |
| 40            | 5             | -1.905433               | 2.872289  | 0.000000 |
| 41            | 7             | -3.116816               | 3.672565  | 0.000000 |
| 42            | 5             | -3.155735               | 5.095483  | 0.000000 |
| 43            | 1             | -4.227269               | 5.632493  | 0.000000 |
| 44            | 1             | -4.008038               | 3.193828  | 0.000000 |
| 45            | 1             | 4.228136                | 3.323909  | 0.000000 |
| 46            | 1             | 4.008364                | 5.762722  | 0.000000 |
| 47            | 1             | 4.010977                | 10.237809 | 0.000000 |
| 48            | 1             | 4.233618                | 12.278036 | 0.000000 |
| 49            | 1             | 4.007452                | 14.728758 | 0.000000 |
| 50            | 1             | 1.948053                | 16.226293 | 0.000000 |
| 51            | 5             | -3.156474               | 0.617111  | 0.000000 |
| 52            | 7             | -1.935669               | 1.410778  | 0.000000 |
| 53            | 7             | -3.117307               | -0.805673 | 0.000000 |
| 54            | 5             | -1.905666               | -1.605730 | 0.000000 |

|     |   |           |            |          |
|-----|---|-----------|------------|----------|
| 55  | 7 | -0.711819 | -0.831766  | 0.000000 |
| 56  | 5 | -0.736813 | 0.633012   | 0.000000 |
| 57  | 7 | 0.711819  | 0.831766   | 0.000000 |
| 58  | 5 | 0.736813  | -0.633012  | 0.000000 |
| 59  | 7 | 1.935669  | -1.410778  | 0.000000 |
| 60  | 5 | 3.156474  | -0.617111  | 0.000000 |
| 61  | 7 | 3.117307  | 0.805673   | 0.000000 |
| 62  | 5 | 1.905666  | 1.605730   | 0.000000 |
| 63  | 1 | -4.227938 | 1.154346   | 0.000000 |
| 64  | 1 | -4.008387 | -1.284675  | 0.000000 |
| 65  | 7 | -1.935884 | -3.067184  | 0.000000 |
| 66  | 5 | -0.736982 | -3.844919  | 0.000000 |
| 67  | 7 | 0.711472  | -3.646119  | 0.000000 |
| 68  | 5 | 1.905433  | -2.872289  | 0.000000 |
| 69  | 7 | 3.116816  | -3.672565  | 0.000000 |
| 70  | 5 | 3.155735  | -5.095483  | 0.000000 |
| 71  | 7 | 1.934852  | -5.889034  | 0.000000 |
| 72  | 5 | 0.736600  | -5.110947  | 0.000000 |
| 73  | 7 | -0.712005 | -5.309699  | 0.000000 |
| 74  | 5 | -1.905470 | -6.083676  | 0.000000 |
| 75  | 7 | -3.117283 | -5.283761  | 0.000000 |
| 76  | 5 | -3.156575 | -3.860990  | 0.000000 |
| 77  | 1 | -4.008364 | -5.762722  | 0.000000 |
| 78  | 1 | -4.228136 | -3.323909  | 0.000000 |
| 79  | 7 | -1.935598 | -7.545328  | 0.000000 |
| 80  | 5 | -0.736601 | -8.324099  | 0.000000 |
| 81  | 7 | 0.711201  | -8.125800  | 0.000000 |
| 82  | 5 | 1.904952  | -7.350913  | 0.000000 |
| 83  | 1 | 4.227269  | -5.632493  | 0.000000 |
| 84  | 7 | 3.116457  | -8.149590  | 0.000000 |
| 85  | 5 | 3.156394  | -9.572725  | 0.000000 |
| 86  | 7 | 1.936936  | -10.367701 | 0.000000 |
| 87  | 5 | 0.737664  | -9.591377  | 0.000000 |
| 88  | 7 | -0.713007 | -9.789211  | 0.000000 |
| 89  | 5 | -1.908438 | -10.560019 | 0.000000 |
| 90  | 7 | -3.119355 | -9.759920  | 0.000000 |
| 91  | 5 | -3.156848 | -8.336857  | 0.000000 |
| 92  | 1 | -4.228196 | -7.799310  | 0.000000 |
| 93  | 1 | -4.010977 | -10.237809 | 0.000000 |
| 94  | 1 | 4.228748  | -10.107878 | 0.000000 |
| 95  | 1 | 4.007326  | -7.670262  | 0.000000 |
| 96  | 1 | 4.008038  | -3.193828  | 0.000000 |
| 97  | 1 | 4.227938  | -1.154346  | 0.000000 |
| 98  | 1 | 4.008387  | 1.284675   | 0.000000 |
| 99  | 5 | -3.162135 | -12.815078 | 0.000000 |
| 100 | 7 | -1.941179 | -12.023645 | 0.000000 |
| 101 | 7 | -3.119878 | -14.242860 | 0.000000 |
| 102 | 5 | -1.905433 | -15.029819 | 0.000000 |
| 103 | 7 | -0.718347 | -14.264141 | 0.000000 |
| 104 | 5 | -0.736850 | -12.795523 | 0.000000 |
| 105 | 7 | 0.710584  | -12.600062 | 0.000000 |
| 106 | 5 | 0.730424  | -14.065629 | 0.000000 |
| 107 | 7 | 1.937763  | -14.799572 | 0.000000 |
| 108 | 5 | 3.173781  | -14.053905 | 0.000000 |
| 109 | 7 | 3.126435  | -12.625629 | 0.000000 |
| 110 | 5 | 1.912548  | -11.831962 | 0.000000 |
| 111 | 1 | -4.233618 | -12.278036 | 0.000000 |
| 112 | 1 | -4.007452 | -14.728758 | 0.000000 |
| 113 | 1 | 4.222960  | -14.629916 | 0.000000 |
| 114 | 1 | 4.013870  | -12.140179 | 0.000000 |
| 115 | 1 | -1.948053 | -16.226293 | 0.000000 |
| 116 | 1 | 1.956607  | -15.810416 | 0.000000 |

**Table S37.** The optimized Cartesian coordinates of the armchair boron nitride ribbon ( $n \times m = 8 \times 1$ ) calculated at the B3LYP/6-31G(d) level of theory

| Center Number | Atomic Number | Coordinates (Angstroms) |           |          |
|---------------|---------------|-------------------------|-----------|----------|
|               |               | X                       | Y         | Z        |
| 1             | 5             | -3.175598               | 16.291337 | 0.000000 |
| 2             | 7             | -1.939653               | 17.037443 | 0.000000 |
| 3             | 7             | -3.127800               | 14.863296 | 0.000000 |

|    |   |           |           |          |
|----|---|-----------|-----------|----------|
| 4  | 5 | -1.913762 | 14.069846 | 0.000000 |
| 5  | 7 | -0.711806 | 14.837839 | 0.000000 |
| 6  | 5 | -0.732534 | 16.303341 | 0.000000 |
| 7  | 7 | 0.716444  | 16.502373 | 0.000000 |
| 8  | 5 | 0.735593  | 15.033874 | 0.000000 |
| 9  | 7 | 1.939850  | 14.262246 | 0.000000 |
| 10 | 5 | 3.160907  | 15.053455 | 0.000000 |
| 11 | 7 | 3.118133  | 16.481257 | 0.000000 |
| 12 | 5 | 1.903627  | 17.268099 | 0.000000 |
| 13 | 1 | -1.958464 | 18.048466 | 0.000000 |
| 14 | 1 | -4.224874 | 16.867135 | 0.000000 |
| 15 | 1 | -4.014926 | 14.377284 | 0.000000 |
| 16 | 7 | -1.938227 | 12.605554 | 0.000000 |
| 17 | 5 | -0.739153 | 11.829364 | 0.000000 |
| 18 | 7 | 0.711707  | 12.028078 | 0.000000 |
| 19 | 5 | 1.907176  | 12.798767 | 0.000000 |
| 20 | 7 | 3.118243  | 11.998868 | 0.000000 |
| 21 | 5 | 3.156351  | 10.575906 | 0.000000 |
| 22 | 7 | 1.934838  | 9.784294  | 0.000000 |
| 23 | 5 | 0.736208  | 10.563107 | 0.000000 |
| 24 | 7 | -0.711870 | 10.364218 | 0.000000 |
| 25 | 5 | -1.905554 | 9.589020  | 0.000000 |
| 26 | 7 | -3.117194 | 10.387458 | 0.000000 |
| 27 | 5 | -3.157688 | 11.810590 | 0.000000 |
| 28 | 1 | -4.007904 | 9.907781  | 0.000000 |
| 29 | 1 | -4.230117 | 12.345657 | 0.000000 |
| 30 | 7 | -1.935274 | 8.127220  | 0.000000 |
| 31 | 5 | -0.737178 | 7.349193  | 0.000000 |
| 32 | 7 | 0.711464  | 7.548568  | 0.000000 |
| 33 | 5 | 1.904993  | 8.322661  | 0.000000 |
| 34 | 1 | 4.227511  | 10.037984 | 0.000000 |
| 35 | 7 | 3.116826  | 7.522815  | 0.000000 |
| 36 | 5 | 3.156521  | 6.100000  | 0.000000 |
| 37 | 7 | 1.935777  | 5.306247  | 0.000000 |
| 38 | 5 | 0.737077  | 6.084027  | 0.000000 |
| 39 | 7 | -0.711464 | 5.884544  | 0.000000 |
| 40 | 5 | -1.905557 | 5.110770  | 0.000000 |
| 41 | 7 | -3.116956 | 5.910878  | 0.000000 |
| 42 | 5 | -3.156267 | 7.333778  | 0.000000 |
| 43 | 1 | -4.227742 | 7.870958  | 0.000000 |
| 44 | 1 | -4.008025 | 5.431801  | 0.000000 |
| 45 | 1 | 4.228103  | 5.562823  | 0.000000 |
| 46 | 1 | 4.007780  | 8.002061  | 0.000000 |
| 47 | 1 | 4.009590  | 12.477355 | 0.000000 |
| 48 | 1 | 4.232347  | 14.516255 | 0.000000 |
| 49 | 1 | 4.005609  | 16.967446 | 0.000000 |
| 50 | 1 | 1.946059  | 18.464584 | 0.000000 |
| 51 | 5 | -3.156678 | 2.855756  | 0.000000 |
| 52 | 7 | -1.935760 | 3.649261  | 0.000000 |
| 53 | 7 | -3.117156 | 1.432950  | 0.000000 |
| 54 | 5 | -1.905549 | 0.632993  | 0.000000 |
| 55 | 7 | -0.711513 | 1.406862  | 0.000000 |
| 56 | 5 | -0.737163 | 2.871440  | 0.000000 |
| 57 | 7 | 0.711536  | 3.070915  | 0.000000 |
| 58 | 5 | 0.737142  | 1.606352  | 0.000000 |
| 59 | 7 | 1.935758  | 0.828494  | 0.000000 |
| 60 | 5 | 3.156679  | 1.622012  | 0.000000 |
| 61 | 7 | 3.117193  | 3.044803  | 0.000000 |
| 62 | 5 | 1.905554  | 3.844782  | 0.000000 |
| 63 | 1 | -4.228126 | 3.393129  | 0.000000 |
| 64 | 1 | -4.008083 | 0.953611  | 0.000000 |
| 65 | 7 | -1.935758 | -0.828494 | 0.000000 |
| 66 | 5 | -0.737142 | -1.606352 | 0.000000 |
| 67 | 7 | 0.711513  | -1.406862 | 0.000000 |
| 68 | 5 | 1.905549  | -0.632993 | 0.000000 |
| 69 | 7 | 3.117156  | -1.432950 | 0.000000 |
| 70 | 5 | 3.156678  | -2.855756 | 0.000000 |
| 71 | 7 | 1.935760  | -3.649261 | 0.000000 |
| 72 | 5 | 0.737163  | -2.871440 | 0.000000 |
| 73 | 7 | -0.711536 | -3.070915 | 0.000000 |
| 74 | 5 | -1.905554 | -3.844782 | 0.000000 |
| 75 | 7 | -3.117193 | -3.044803 | 0.000000 |
| 76 | 5 | -3.156679 | -1.622012 | 0.000000 |
| 77 | 1 | -4.008107 | -3.524169 | 0.000000 |
| 78 | 1 | -4.228149 | -1.084644 | 0.000000 |
| 79 | 7 | -1.935777 | -5.306247 | 0.000000 |
| 80 | 5 | -0.737077 | -6.084027 | 0.000000 |
| 81 | 7 | 0.711464  | -5.884544 | 0.000000 |
| 82 | 5 | 1.905557  | -5.110770 | 0.000000 |

|     |   |           |            |          |
|-----|---|-----------|------------|----------|
| 83  | 1 | 4.228126  | -3.393129  | 0.000000 |
| 84  | 7 | 3.116956  | -5.910878  | 0.000000 |
| 85  | 5 | 3.156267  | -7.333778  | 0.000000 |
| 86  | 7 | 1.935274  | -8.127220  | 0.000000 |
| 87  | 5 | 0.737178  | -7.349193  | 0.000000 |
| 88  | 7 | -0.711464 | -7.548568  | 0.000000 |
| 89  | 5 | -1.904993 | -8.322661  | 0.000000 |
| 90  | 7 | -3.116826 | -7.522815  | 0.000000 |
| 91  | 5 | -3.156521 | -6.100000  | 0.000000 |
| 92  | 1 | -4.228103 | -5.562823  | 0.000000 |
| 93  | 1 | -4.007780 | -8.002061  | 0.000000 |
| 94  | 1 | 4.227742  | -7.870958  | 0.000000 |
| 95  | 1 | 4.008025  | -5.431801  | 0.000000 |
| 96  | 1 | 4.008083  | -0.953611  | 0.000000 |
| 97  | 1 | 4.228149  | 1.084644   | 0.000000 |
| 98  | 1 | 4.008107  | 3.524169   | 0.000000 |
| 99  | 5 | -3.156351 | -10.575906 | 0.000000 |
| 100 | 7 | -1.934838 | -9.784294  | 0.000000 |
| 101 | 7 | -3.118243 | -11.998868 | 0.000000 |
| 102 | 5 | -1.907176 | -12.798767 | 0.000000 |
| 103 | 7 | -0.711707 | -12.028078 | 0.000000 |
| 104 | 5 | -0.736208 | -10.563107 | 0.000000 |
| 105 | 7 | 0.711870  | -10.364218 | 0.000000 |
| 106 | 5 | 0.739153  | -11.829364 | 0.000000 |
| 107 | 7 | 1.938227  | -12.605554 | 0.000000 |
| 108 | 5 | 3.157688  | -11.810590 | 0.000000 |
| 109 | 7 | 3.117194  | -10.387458 | 0.000000 |
| 110 | 5 | 1.905554  | -9.589020  | 0.000000 |
| 111 | 1 | -4.227511 | -10.037984 | 0.000000 |
| 112 | 1 | -4.009590 | -12.477355 | 0.000000 |
| 113 | 7 | -1.939850 | -14.262246 | 0.000000 |
| 114 | 5 | -0.735593 | -15.033874 | 0.000000 |
| 115 | 7 | 0.711806  | -14.837839 | 0.000000 |
| 116 | 5 | 1.913762  | -14.069846 | 0.000000 |
| 117 | 7 | 3.127800  | -14.863296 | 0.000000 |
| 118 | 5 | 3.175598  | -16.291337 | 0.000000 |
| 119 | 7 | 1.939653  | -17.037443 | 0.000000 |
| 120 | 5 | 0.732534  | -16.303341 | 0.000000 |
| 121 | 7 | -0.716444 | -16.502373 | 0.000000 |
| 122 | 5 | -1.903627 | -17.268099 | 0.000000 |
| 123 | 7 | -3.118133 | -16.481257 | 0.000000 |
| 124 | 5 | -3.160907 | -15.053455 | 0.000000 |
| 125 | 1 | -4.005609 | -16.967446 | 0.000000 |
| 126 | 1 | -4.232347 | -14.516255 | 0.000000 |
| 127 | 1 | 4.224874  | -16.867135 | 0.000000 |
| 128 | 1 | 4.014926  | -14.377284 | 0.000000 |
| 129 | 1 | 4.230117  | -12.345657 | 0.000000 |
| 130 | 1 | 4.007904  | -9.907781  | 0.000000 |
| 131 | 1 | 1.958464  | -18.048466 | 0.000000 |
| 132 | 1 | -1.946059 | -18.464584 | 0.000000 |

**Table S38.** The optimized Cartesian coordinates of the armchair boron nitride ribbon ( $n \times m = 9 \times 1$ ) calculated at the B3LYP/6-31G(d) level of theory

| Center Number | Atomic Number | Coordinates (Angstroms) |           |          |
|---------------|---------------|-------------------------|-----------|----------|
|               |               | X                       | Y         | Z        |
| 1             | 5             | -3.175094               | 18.530734 | 0.000000 |
| 2             | 7             | -1.939021               | 19.276616 | 0.000000 |
| 3             | 7             | -3.127423               | 17.102623 | 0.000000 |
| 4             | 5             | -1.913443               | 16.308968 | 0.000000 |
| 5             | 7             | -0.711493               | 17.076878 | 0.000000 |
| 6             | 5             | -0.732010               | 18.542393 | 0.000000 |
| 7             | 7             | 0.716991                | 18.741354 | 0.000000 |
| 8             | 5             | 0.735953                | 17.272904 | 0.000000 |
| 9             | 7             | 1.940094                | 16.501170 | 0.000000 |
| 10            | 5             | 3.161224                | 17.292232 | 0.000000 |
| 11            | 7             | 3.118643                | 18.720052 | 0.000000 |
| 12            | 5             | 1.904170                | 19.506963 | 0.000000 |
| 13            | 1             | -1.957606               | 20.287761 | 0.000000 |
| 14            | 1             | -4.224280               | 19.106689 | 0.000000 |
| 15            | 1             | -4.014638               | 16.616753 | 0.000000 |

|    |   |           |           |          |
|----|---|-----------|-----------|----------|
| 16 | 7 | -1.938025 | 14.844608 | 0.000000 |
| 17 | 5 | -0.739038 | 14.068320 | 0.000000 |
| 18 | 7 | 0.711805  | 14.267108 | 0.000000 |
| 19 | 5 | 1.907266  | 15.037693 | 0.000000 |
| 20 | 7 | 3.118316  | 14.237688 | 0.000000 |
| 21 | 5 | 3.156307  | 12.814728 | 0.000000 |
| 22 | 7 | 1.934762  | 12.023227 | 0.000000 |
| 23 | 5 | 0.736215  | 12.802150 | 0.000000 |
| 24 | 7 | -0.711844 | 12.603126 | 0.000000 |
| 25 | 5 | -1.905516 | 11.827996 | 0.000000 |
| 26 | 7 | -3.117144 | 12.626574 | 0.000000 |
| 27 | 5 | -3.157499 | 14.049752 | 0.000000 |
| 28 | 1 | -4.007864 | 12.146920 | 0.000000 |
| 29 | 1 | -4.229779 | 14.584946 | 0.000000 |
| 30 | 7 | -1.935358 | 10.366112 | 0.000000 |
| 31 | 5 | -0.737289 | 9.588025  | 0.000000 |
| 32 | 7 | 0.711303  | 9.787535  | 0.000000 |
| 33 | 5 | 1.904805  | 10.561562 | 0.000000 |
| 34 | 1 | 4.227313  | 12.276668 | 0.000000 |
| 35 | 7 | 3.116676  | 9.761690  | 0.000000 |
| 36 | 5 | 3.156306  | 8.338867  | 0.000000 |
| 37 | 7 | 1.935572  | 7.545207  | 0.000000 |
| 38 | 5 | 0.736893  | 8.322961  | 0.000000 |
| 39 | 7 | -0.711614 | 8.123359  | 0.000000 |
| 40 | 5 | -1.905655 | 7.349605  | 0.000000 |
| 41 | 7 | -3.117074 | 8.149747  | 0.000000 |
| 42 | 5 | -3.156306 | 9.572696  | 0.000000 |
| 43 | 1 | -4.227669 | 10.109938 | 0.000000 |
| 44 | 1 | -4.008155 | 7.670702  | 0.000000 |
| 45 | 1 | 4.227786  | 7.801643  | 0.000000 |
| 46 | 1 | 4.007603  | 10.240976 | 0.000000 |
| 47 | 1 | 4.009686  | 14.716137 | 0.000000 |
| 48 | 1 | 4.232489  | 16.754858 | 0.000000 |
| 49 | 1 | 4.006117  | 19.206239 | 0.000000 |
| 50 | 1 | 1.946786  | 20.703443 | 0.000000 |
| 51 | 5 | -3.156714 | 5.094667  | 0.000000 |
| 52 | 7 | -1.935816 | 5.888154  | 0.000000 |
| 53 | 7 | -3.117194 | 3.671832  | 0.000000 |
| 54 | 5 | -1.905538 | 2.871864  | 0.000000 |
| 55 | 7 | -0.711581 | 3.645725  | 0.000000 |
| 56 | 5 | -0.737251 | 5.110358  | 0.000000 |
| 57 | 7 | 0.711440  | 5.309941  | 0.000000 |
| 58 | 5 | 0.737014  | 3.845378  | 0.000000 |
| 59 | 7 | 1.935655  | 3.067548  | 0.000000 |
| 60 | 5 | 3.156518  | 3.861038  | 0.000000 |
| 61 | 7 | 3.117082  | 5.283849  | 0.000000 |
| 62 | 5 | 1.905392  | 6.083816  | 0.000000 |
| 63 | 1 | -4.228065 | 5.632065  | 0.000000 |
| 64 | 1 | -4.008104 | 3.192455  | 0.000000 |
| 65 | 7 | -1.935724 | 1.410308  | 0.000000 |
| 66 | 5 | -0.737151 | 0.632453  | 0.000000 |
| 67 | 7 | 0.711493  | 0.832139  | 0.000000 |
| 68 | 5 | 1.905431  | 1.606020  | 0.000000 |
| 69 | 7 | 3.117103  | 0.806012  | 0.000000 |
| 70 | 5 | 3.156608  | -0.616794 | 0.000000 |
| 71 | 7 | 1.935724  | -1.410308 | 0.000000 |
| 72 | 5 | 0.737151  | -0.632453 | 0.000000 |
| 73 | 7 | -0.711493 | -0.832139 | 0.000000 |
| 74 | 5 | -1.905431 | -1.606020 | 0.000000 |
| 75 | 7 | -3.117103 | -0.806012 | 0.000000 |
| 76 | 5 | -3.156608 | 0.616794  | 0.000000 |
| 77 | 1 | -4.008005 | -1.285401 | 0.000000 |
| 78 | 1 | -4.227960 | 1.154205  | 0.000000 |
| 79 | 7 | -1.935655 | -3.067548 | 0.000000 |
| 80 | 5 | -0.737014 | -3.845378 | 0.000000 |
| 81 | 7 | 0.711581  | -3.645725 | 0.000000 |
| 82 | 5 | 1.905538  | -2.871864 | 0.000000 |
| 83 | 1 | 4.227960  | -1.154205 | 0.000000 |
| 84 | 7 | 3.117194  | -3.671832 | 0.000000 |
| 85 | 5 | 3.156714  | -5.094667 | 0.000000 |
| 86 | 7 | 1.935816  | -5.888154 | 0.000000 |
| 87 | 5 | 0.737251  | -5.110358 | 0.000000 |
| 88 | 7 | -0.711440 | -5.309941 | 0.000000 |
| 89 | 5 | -1.905392 | -6.083816 | 0.000000 |
| 90 | 7 | -3.117082 | -5.283849 | 0.000000 |
| 91 | 5 | -3.156518 | -3.861038 | 0.000000 |
| 92 | 1 | -4.227876 | -3.323616 | 0.000000 |
| 93 | 1 | -4.007995 | -5.763201 | 0.000000 |
| 94 | 1 | 4.228065  | -5.632065 | 0.000000 |

|     |   |           |            |          |
|-----|---|-----------|------------|----------|
| 95  | 1 | 4.008104  | -3.192455  | 0.000000 |
| 96  | 1 | 4.008005  | 1.285401   | 0.000000 |
| 97  | 1 | 4.227876  | 3.323616   | 0.000000 |
| 98  | 1 | 4.007995  | 5.763201   | 0.000000 |
| 99  | 5 | -3.156306 | -8.338867  | 0.000000 |
| 100 | 7 | -1.935572 | -7.545207  | 0.000000 |
| 101 | 7 | -3.116676 | -9.761690  | 0.000000 |
| 102 | 5 | -1.904805 | -10.561562 | 0.000000 |
| 103 | 7 | -0.711303 | -9.787535  | 0.000000 |
| 104 | 5 | -0.736893 | -8.322961  | 0.000000 |
| 105 | 7 | 0.711614  | -8.123359  | 0.000000 |
| 106 | 5 | 0.737289  | -9.588025  | 0.000000 |
| 107 | 7 | 1.935358  | -10.366112 | 0.000000 |
| 108 | 5 | 3.156306  | -9.572696  | 0.000000 |
| 109 | 7 | 3.117074  | -8.149747  | 0.000000 |
| 110 | 5 | 1.905655  | -7.349605  | 0.000000 |
| 111 | 1 | -4.227786 | -7.801643  | 0.000000 |
| 112 | 1 | -4.007603 | -10.240976 | 0.000000 |
| 113 | 7 | -1.934762 | -12.023227 | 0.000000 |
| 114 | 5 | -0.736215 | -12.802150 | 0.000000 |
| 115 | 7 | 0.711844  | -12.603126 | 0.000000 |
| 116 | 5 | 1.905516  | -11.827996 | 0.000000 |
| 117 | 7 | 3.117144  | -12.626574 | 0.000000 |
| 118 | 5 | 3.157499  | -14.049752 | 0.000000 |
| 119 | 7 | 1.938025  | -14.844608 | 0.000000 |
| 120 | 5 | 0.739038  | -14.068320 | 0.000000 |
| 121 | 7 | -0.711805 | -14.267108 | 0.000000 |
| 122 | 5 | -1.907266 | -15.037693 | 0.000000 |
| 123 | 7 | -3.118316 | -14.237688 | 0.000000 |
| 124 | 5 | -3.156307 | -12.814728 | 0.000000 |
| 125 | 1 | -4.009686 | -14.716137 | 0.000000 |
| 126 | 1 | -4.227313 | -12.276668 | 0.000000 |
| 127 | 7 | -1.940094 | -16.501170 | 0.000000 |
| 128 | 5 | -0.735953 | -17.272904 | 0.000000 |
| 129 | 7 | 0.711493  | -17.076878 | 0.000000 |
| 130 | 5 | 1.913443  | -16.308968 | 0.000000 |
| 131 | 1 | 4.229779  | -14.584946 | 0.000000 |
| 132 | 7 | 3.127423  | -17.102623 | 0.000000 |
| 133 | 5 | 3.175094  | -18.530734 | 0.000000 |
| 134 | 7 | 1.939021  | -19.276616 | 0.000000 |
| 135 | 5 | 0.732010  | -18.542393 | 0.000000 |
| 136 | 7 | -0.716991 | -18.741354 | 0.000000 |
| 137 | 5 | -1.904170 | -19.506963 | 0.000000 |
| 138 | 7 | -3.118643 | -18.720052 | 0.000000 |
| 139 | 5 | -3.161224 | -17.292232 | 0.000000 |
| 140 | 1 | -4.232489 | -16.754858 | 0.000000 |
| 141 | 1 | -4.006117 | -19.206239 | 0.000000 |
| 142 | 1 | 4.224280  | -19.106689 | 0.000000 |
| 143 | 1 | 4.014638  | -16.616753 | 0.000000 |
| 144 | 1 | 4.007864  | -12.146920 | 0.000000 |
| 145 | 1 | 4.227669  | -10.109938 | 0.000000 |
| 146 | 1 | 4.008155  | -7.670702  | 0.000000 |
| 147 | 1 | 1.957606  | -20.287761 | 0.000000 |
| 148 | 1 | -1.946786 | -20.703443 | 0.000000 |

**Table S39.** The optimized Cartesian coordinates of the armchair boron nitride ribbon ( $n \times m = 10 \times 1$ ) calculated at the B3LYP/6-31G(d) level of theory

| Center Number | Atomic Number | Coordinates (Angstroms) |           |          |
|---------------|---------------|-------------------------|-----------|----------|
|               |               | X                       | Y         | Z        |
| 1             | 5             | -3.174047               | 20.771434 | 0.000000 |
| 2             | 7             | -1.937772               | 21.516976 | 0.000000 |
| 3             | 7             | -3.126662               | 19.343259 | 0.000000 |
| 4             | 5             | -1.912827               | 18.549388 | 0.000000 |
| 5             | 7             | -0.710764               | 19.317278 | 0.000000 |
| 6             | 5             | -0.730641               | 20.782883 | 0.000000 |
| 7             | 7             | 0.718332                | 20.981196 | 0.000000 |
| 8             | 5             | 0.736720                | 19.512642 | 0.000000 |
| 9             | 7             | 1.940995                | 18.740748 | 0.000000 |
| 10            | 5             | 3.162047                | 19.531946 | 0.000000 |
| 11            | 7             | 3.119926                | 20.959762 | 0.000000 |
| 12            | 5             | 1.905461                | 21.746771 | 0.000000 |
| 13            | 1             | -1.956375               | 22.527994 | 0.000000 |

|    |   |           |           |          |
|----|---|-----------|-----------|----------|
| 14 | 1 | -4.222982 | 21.347858 | 0.000000 |
| 15 | 1 | -4.014094 | 18.857831 | 0.000000 |
| 16 | 7 | -1.937407 | 17.085081 | 0.000000 |
| 17 | 5 | -0.738173 | 16.308825 | 0.000000 |
| 18 | 7 | 0.712588  | 16.506748 | 0.000000 |
| 19 | 5 | 1.908027  | 17.277400 | 0.000000 |
| 20 | 7 | 3.119013  | 16.477267 | 0.000000 |
| 21 | 5 | 3.156632  | 15.054344 | 0.000000 |
| 22 | 7 | 1.935151  | 14.262703 | 0.000000 |
| 23 | 5 | 0.736343  | 15.041624 | 0.000000 |
| 24 | 7 | -0.711628 | 14.843381 | 0.000000 |
| 25 | 5 | -1.905266 | 14.068186 | 0.000000 |
| 26 | 7 | -3.116838 | 14.866892 | 0.000000 |
| 27 | 5 | -3.156852 | 16.290032 | 0.000000 |
| 28 | 1 | -4.007719 | 14.387632 | 0.000000 |
| 29 | 1 | -4.229207 | 16.825161 | 0.000000 |
| 30 | 7 | -1.935181 | 12.606373 | 0.000000 |
| 31 | 5 | -0.736865 | 11.828292 | 0.000000 |
| 32 | 7 | 0.711627  | 12.027103 | 0.000000 |
| 33 | 5 | 1.905104  | 12.801189 | 0.000000 |
| 34 | 1 | 4.227728  | 14.516331 | 0.000000 |
| 35 | 7 | 3.116965  | 12.001239 | 0.000000 |
| 36 | 5 | 3.156263  | 10.578457 | 0.000000 |
| 37 | 7 | 1.935611  | 9.784643  | 0.000000 |
| 38 | 5 | 0.736686  | 10.562337 | 0.000000 |
| 39 | 7 | -0.711749 | 10.363413 | 0.000000 |
| 40 | 5 | -1.905722 | 9.589563  | 0.000000 |
| 41 | 7 | -3.117093 | 10.389792 | 0.000000 |
| 42 | 5 | -3.156047 | 11.812715 | 0.000000 |
| 43 | 1 | -4.227548 | 12.349797 | 0.000000 |
| 44 | 1 | -4.008329 | 9.911106  | 0.000000 |
| 45 | 1 | 4.227850  | 10.041306 | 0.000000 |
| 46 | 1 | 4.008062  | 12.480116 | 0.000000 |
| 47 | 1 | 4.010580  | 16.955255 | 0.000000 |
| 48 | 1 | 4.233433  | 18.994648 | 0.000000 |
| 49 | 1 | 4.007535  | 21.445540 | 0.000000 |
| 50 | 1 | 1.948529  | 22.943223 | 0.000000 |
| 51 | 5 | -3.156378 | 7.334278  | 0.000000 |
| 52 | 7 | -1.935898 | 8.127992  | 0.000000 |
| 53 | 7 | -3.117220 | 5.911333  | 0.000000 |
| 54 | 5 | -1.905619 | 5.111288  | 0.000000 |
| 55 | 7 | -0.711802 | 5.885606  | 0.000000 |
| 56 | 5 | -0.736787 | 7.350445  | 0.000000 |
| 57 | 7 | 0.711558  | 7.549441  | 0.000000 |
| 58 | 5 | 0.736535  | 6.084521  | 0.000000 |
| 59 | 7 | 1.935541  | 5.306636  | 0.000000 |
| 60 | 5 | 3.156269  | 6.100460  | 0.000000 |
| 61 | 7 | 3.117128  | 7.523198  | 0.000000 |
| 62 | 5 | 1.905503  | 8.323240  | 0.000000 |
| 63 | 1 | -4.228126 | 7.871118  | 0.000000 |
| 64 | 1 | -4.008338 | 5.432480  | 0.000000 |
| 65 | 7 | -1.935664 | 3.649703  | 0.000000 |
| 66 | 5 | -0.736719 | 2.871818  | 0.000000 |
| 67 | 7 | 0.711620  | 3.070772  | 0.000000 |
| 68 | 5 | 1.905461  | 3.845078  | 0.000000 |
| 69 | 7 | 3.117093  | 3.045017  | 0.000000 |
| 70 | 5 | 3.156232  | 1.622093  | 0.000000 |
| 71 | 7 | 1.935758  | 0.828420  | 0.000000 |
| 72 | 5 | 0.736659  | 1.605998  | 0.000000 |
| 73 | 7 | -0.711658 | 1.406827  | 0.000000 |
| 74 | 5 | -1.905642 | 0.633108  | 0.000000 |
| 75 | 7 | -3.117235 | 1.433102  | 0.000000 |
| 76 | 5 | -3.156411 | 2.855862  | 0.000000 |
| 77 | 1 | -4.008320 | 0.954136  | 0.000000 |
| 78 | 1 | -4.227913 | 3.393158  | 0.000000 |
| 79 | 7 | -1.935758 | -0.828420 | 0.000000 |
| 80 | 5 | -0.736659 | -1.605998 | 0.000000 |
| 81 | 7 | 0.711658  | -1.406827 | 0.000000 |
| 82 | 5 | 1.905642  | -0.633108 | 0.000000 |
| 83 | 1 | 4.228039  | 1.085292  | 0.000000 |
| 84 | 7 | 3.117235  | -1.433102 | 0.000000 |
| 85 | 5 | 3.156411  | -2.855862 | 0.000000 |
| 86 | 7 | 1.935664  | -3.649703 | 0.000000 |
| 87 | 5 | 0.736719  | -2.871818 | 0.000000 |
| 88 | 7 | -0.711620 | -3.070772 | 0.000000 |
| 89 | 5 | -1.905461 | -3.845078 | 0.000000 |
| 90 | 7 | -3.117093 | -3.045017 | 0.000000 |
| 91 | 5 | -3.156232 | -1.622093 | 0.000000 |
| 92 | 1 | -4.228039 | -1.085292 | 0.000000 |

|     |   |           |            |          |
|-----|---|-----------|------------|----------|
| 93  | 1 | -4.008186 | -3.523912  | 0.000000 |
| 94  | 1 | 4.227913  | -3.393158  | 0.000000 |
| 95  | 1 | 4.008320  | -0.954136  | 0.000000 |
| 96  | 1 | 4.008186  | 3.523912   | 0.000000 |
| 97  | 1 | 4.227781  | 5.563150   | 0.000000 |
| 98  | 1 | 4.008223  | 8.002130   | 0.000000 |
| 99  | 5 | -3.156269 | -6.100460  | 0.000000 |
| 100 | 7 | -1.935541 | -5.306636  | 0.000000 |
| 101 | 7 | -3.117128 | -7.523198  | 0.000000 |
| 102 | 5 | -1.905503 | -8.323240  | 0.000000 |
| 103 | 7 | -0.711558 | -7.549441  | 0.000000 |
| 104 | 5 | -0.736535 | -6.084521  | 0.000000 |
| 105 | 7 | 0.711802  | -5.885606  | 0.000000 |
| 106 | 5 | 0.736787  | -7.350445  | 0.000000 |
| 107 | 7 | 1.935898  | -8.127992  | 0.000000 |
| 108 | 5 | 3.156378  | -7.334278  | 0.000000 |
| 109 | 7 | 3.117220  | -5.911333  | 0.000000 |
| 110 | 5 | 1.905619  | -5.111288  | 0.000000 |
| 111 | 1 | -4.227781 | -5.563150  | 0.000000 |
| 112 | 1 | -4.008223 | -8.002130  | 0.000000 |
| 113 | 7 | -1.935611 | -9.784643  | 0.000000 |
| 114 | 5 | -0.736686 | -10.562337 | 0.000000 |
| 115 | 7 | 0.711749  | -10.363413 | 0.000000 |
| 116 | 5 | 1.905722  | -9.589563  | 0.000000 |
| 117 | 7 | 3.117093  | -10.389792 | 0.000000 |
| 118 | 5 | 3.156047  | -11.812715 | 0.000000 |
| 119 | 7 | 1.935181  | -12.606373 | 0.000000 |
| 120 | 5 | 0.736865  | -11.828292 | 0.000000 |
| 121 | 7 | -0.711627 | -12.027103 | 0.000000 |
| 122 | 5 | -1.905104 | -12.801189 | 0.000000 |
| 123 | 7 | -3.116965 | -12.001239 | 0.000000 |
| 124 | 5 | -3.156263 | -10.578457 | 0.000000 |
| 125 | 1 | -4.008062 | -12.480116 | 0.000000 |
| 126 | 1 | -4.227850 | -10.041306 | 0.000000 |
| 127 | 7 | -1.935151 | -14.262703 | 0.000000 |
| 128 | 5 | -0.736343 | -15.041624 | 0.000000 |
| 129 | 7 | 0.711628  | -14.843381 | 0.000000 |
| 130 | 5 | 1.905266  | -14.068186 | 0.000000 |
| 131 | 1 | 4.227548  | -12.349797 | 0.000000 |
| 132 | 7 | 3.116838  | -14.866892 | 0.000000 |
| 133 | 5 | 3.156852  | -16.290032 | 0.000000 |
| 134 | 7 | 1.937407  | -17.085081 | 0.000000 |
| 135 | 5 | 0.738173  | -16.308825 | 0.000000 |
| 136 | 7 | -0.712588 | -16.506748 | 0.000000 |
| 137 | 5 | -1.908027 | -17.277400 | 0.000000 |
| 138 | 7 | -3.119013 | -16.477267 | 0.000000 |
| 139 | 5 | -3.156632 | -15.054344 | 0.000000 |
| 140 | 1 | -4.227728 | -14.516331 | 0.000000 |
| 141 | 1 | -4.010580 | -16.955255 | 0.000000 |
| 142 | 1 | 4.229207  | -16.825161 | 0.000000 |
| 143 | 1 | 4.007719  | -14.387632 | 0.000000 |
| 144 | 1 | 4.008329  | -9.911106  | 0.000000 |
| 145 | 1 | 4.228126  | -7.871118  | 0.000000 |
| 146 | 1 | 4.008338  | -5.432480  | 0.000000 |
| 147 | 5 | -3.162047 | -19.531946 | 0.000000 |
| 148 | 7 | -1.940995 | -18.740748 | 0.000000 |
| 149 | 7 | -3.119926 | -20.959762 | 0.000000 |
| 150 | 5 | -1.905461 | -21.746771 | 0.000000 |
| 151 | 7 | -0.718332 | -20.981196 | 0.000000 |
| 152 | 5 | -0.736720 | -19.512642 | 0.000000 |
| 153 | 7 | 0.710764  | -19.317278 | 0.000000 |
| 154 | 5 | 0.730641  | -20.782883 | 0.000000 |
| 155 | 7 | 1.937772  | -21.516976 | 0.000000 |
| 156 | 5 | 3.174047  | -20.771434 | 0.000000 |
| 157 | 7 | 3.126662  | -19.343259 | 0.000000 |
| 158 | 5 | 1.912827  | -18.549388 | 0.000000 |
| 159 | 1 | -4.233433 | -18.994648 | 0.000000 |
| 160 | 1 | -4.007535 | -21.445540 | 0.000000 |
| 161 | 1 | 4.222982  | -21.347858 | 0.000000 |
| 162 | 1 | 4.014094  | -18.857831 | 0.000000 |
| 163 | 1 | -1.948529 | -22.943223 | 0.000000 |
| 164 | 1 | 1.956375  | -22.527994 | 0.000000 |



**Table S40.** The optimized Cartesian coordinates of the tunnel-like carbon allotrope calculated at the B3LYP/6–31G(d) level of theory

| Center<br>Number | Atomic<br>Number | Coordinates (Angstroms) |           |           |
|------------------|------------------|-------------------------|-----------|-----------|
|                  |                  | X                       | Y         | Z         |
| 1                | 6                | -0.778565               | 1.991306  | 0.845496  |
| 2                | 6                | -1.521765               | 0.798158  | 1.358840  |
| 3                | 6                | -2.886375               | 3.173130  | 1.388499  |
| 4                | 6                | -3.642717               | 1.971235  | 0.818127  |
| 5                | 6                | -2.862440               | 0.783653  | 1.321660  |
| 6                | 6                | -1.549499               | 3.176047  | 1.413090  |
| 7                | 1                | -3.457752               | 4.010966  | 1.779854  |
| 8                | 1                | -1.010976               | 4.025189  | 1.820880  |
| 9                | 6                | -0.778565               | 1.991306  | -0.845496 |
| 10               | 6                | -3.642717               | 1.971235  | -0.818127 |
| 11               | 6                | -1.549499               | 3.176047  | -1.413090 |
| 12               | 6                | -2.886375               | 3.173130  | -1.388499 |
| 13               | 6                | -1.521765               | 0.798158  | -1.358840 |
| 14               | 6                | -2.862440               | 0.783653  | -1.321660 |
| 15               | 1                | -1.010976               | 4.025189  | -1.820880 |
| 16               | 1                | -3.457752               | 4.010966  | -1.779854 |
| 17               | 1                | -4.686370               | 1.980429  | -1.152297 |
| 18               | 1                | -4.686370               | 1.980429  | 1.152297  |
| 19               | 6                | 3.642717                | 1.971235  | 0.818127  |
| 20               | 6                | 2.862440                | 0.783653  | 1.321660  |
| 21               | 6                | 1.549499                | 3.176047  | 1.413090  |
| 22               | 6                | 0.778565                | 1.991306  | 0.845496  |
| 23               | 6                | 1.521765                | 0.798158  | 1.358840  |
| 24               | 6                | 2.886375                | 3.173130  | 1.388499  |
| 25               | 1                | 1.010976                | 4.025189  | 1.820880  |
| 26               | 1                | 3.457752                | 4.010966  | 1.779854  |
| 27               | 6                | 3.642717                | 1.971235  | -0.818127 |
| 28               | 6                | 0.778565                | 1.991306  | -0.845496 |
| 29               | 6                | 2.886375                | 3.173130  | -1.388499 |
| 30               | 6                | 1.549499                | 3.176047  | -1.413090 |
| 31               | 6                | 2.862440                | 0.783653  | -1.321660 |
| 32               | 6                | 1.521765                | 0.798158  | -1.358840 |
| 33               | 1                | 3.457752                | 4.010966  | -1.779854 |
| 34               | 1                | 1.010976                | 4.025189  | -1.820880 |
| 35               | 1                | 4.686370                | 1.980429  | -1.152297 |
| 36               | 1                | 4.686370                | 1.980429  | 1.152297  |
| 37               | 6                | -0.778565               | -1.991306 | 0.845496  |
| 38               | 6                | -1.549499               | -3.176047 | 1.413090  |
| 39               | 6                | -2.862440               | -0.783653 | 1.321660  |
| 40               | 6                | -3.642717               | -1.971235 | 0.818127  |
| 41               | 6                | -2.886375               | -3.173130 | 1.388499  |
| 42               | 6                | -1.521765               | -0.798158 | 1.358840  |
| 43               | 1                | -1.010976               | -4.025189 | 1.820880  |
| 44               | 1                | -3.457752               | -4.010966 | 1.779854  |
| 45               | 6                | -0.778565               | -1.991306 | -0.845496 |
| 46               | 6                | -3.642717               | -1.971235 | -0.818127 |
| 47               | 6                | -1.521765               | -0.798158 | -1.358840 |
| 48               | 6                | -2.862440               | -0.783653 | -1.321660 |
| 49               | 6                | -1.549499               | -3.176047 | -1.413090 |
| 50               | 6                | -2.886375               | -3.173130 | -1.388499 |
| 51               | 1                | -1.010976               | -4.025189 | -1.820880 |
| 52               | 1                | -3.457752               | -4.010966 | -1.779854 |
| 53               | 1                | -4.686370               | -1.980429 | -1.152297 |
| 54               | 1                | -4.686370               | -1.980429 | 1.152297  |
| 55               | 6                | 3.642717                | -1.971235 | 0.818127  |
| 56               | 6                | 2.886375                | -3.173130 | 1.388499  |
| 57               | 6                | 1.521765                | -0.798158 | 1.358840  |
| 58               | 6                | 0.778565                | -1.991306 | 0.845496  |
| 59               | 6                | 1.549499                | -3.176047 | 1.413090  |
| 60               | 6                | 2.862440                | -0.783653 | 1.321660  |
| 61               | 1                | 3.457752                | -4.010966 | 1.779854  |
| 62               | 1                | 1.010976                | -4.025189 | 1.820880  |
| 63               | 6                | 3.642717                | -1.971235 | -0.818127 |
| 64               | 6                | 0.778565                | -1.991306 | -0.845496 |
| 65               | 6                | 2.862440                | -0.783653 | -1.321660 |
| 66               | 6                | 1.521765                | -0.798158 | -1.358840 |
| 67               | 6                | 2.886375                | -3.173130 | -1.388499 |
| 68               | 6                | 1.549499                | -3.176047 | -1.413090 |
| 69               | 1                | 3.457752                | -4.010966 | -1.779854 |
| 70               | 1                | 1.010976                | -4.025189 | -1.820880 |

|    |   |          |           |           |
|----|---|----------|-----------|-----------|
| 71 | 1 | 4.686370 | -1.980429 | -1.152297 |
| 72 | 1 | 4.686370 | -1.980429 | 1.152297  |

**Table S41.** The optimized Cartesian coordinates of the Li-containing complex with the “tunnel” graphene cluster calculated at the B3LYP/6–31G(d) level of theory

| Center<br>Number | Atomic<br>Number | Coordinates (Angstroms) |           |           |
|------------------|------------------|-------------------------|-----------|-----------|
|                  |                  | X                       | Y         | Z         |
| 1                | 6                | -0.724918               | 1.888298  | 2.021562  |
| 2                | 6                | -1.480005               | 0.730010  | 1.963510  |
| 3                | 6                | -2.795681               | 3.125712  | 1.369696  |
| 4                | 6                | -3.529991               | 1.909643  | 0.837887  |
| 5                | 6                | -2.873890               | 0.695025  | 1.415690  |
| 6                | 6                | -1.531444               | 3.107763  | 1.852402  |
| 7                | 1                | -3.314665               | 4.077533  | 1.297793  |
| 8                | 1                | -1.080270               | 4.056045  | 2.131998  |
| 9                | 6                | -0.724918               | 1.888298  | -2.021562 |
| 10               | 6                | -3.529991               | 1.909643  | -0.837887 |
| 11               | 6                | -1.531444               | 3.107763  | -1.852402 |
| 12               | 6                | -2.795681               | 3.125712  | -1.369696 |
| 13               | 6                | -1.480005               | 0.730010  | -1.963510 |
| 14               | 6                | -2.873890               | 0.695025  | -1.415690 |
| 15               | 1                | -1.080270               | 4.056045  | -2.131998 |
| 16               | 1                | -3.314665               | 4.077533  | -1.297793 |
| 17               | 1                | -4.588982               | 1.964699  | -1.117168 |
| 18               | 1                | -4.588982               | 1.964699  | 1.117168  |
| 19               | 6                | 3.529991                | 1.909643  | 0.837887  |
| 20               | 6                | 2.873890                | 0.695025  | 1.415690  |
| 21               | 6                | 1.531444                | 3.107763  | 1.852402  |
| 22               | 6                | 0.724918                | 1.888298  | 2.021562  |
| 23               | 6                | 1.480005                | 0.730010  | 1.963510  |
| 24               | 6                | 2.795681                | 3.125712  | 1.369696  |
| 25               | 1                | 1.080270                | 4.056045  | 2.131998  |
| 26               | 1                | 3.314665                | 4.077533  | 1.297793  |
| 27               | 6                | 3.529991                | 1.909643  | -0.837887 |
| 28               | 6                | 0.724918                | 1.888298  | -2.021562 |
| 29               | 6                | 2.795681                | 3.125712  | -1.369696 |
| 30               | 6                | 1.531444                | 3.107763  | -1.852402 |
| 31               | 6                | 2.873890                | 0.695025  | -1.415690 |
| 32               | 6                | 1.480005                | 0.730010  | -1.963510 |
| 33               | 1                | 3.314665                | 4.077533  | -1.297793 |
| 34               | 1                | 1.080270                | 4.056045  | -2.131998 |
| 35               | 1                | 4.588982                | 1.964699  | -1.117168 |
| 36               | 1                | 4.588982                | 1.964699  | 1.117168  |
| 37               | 6                | -0.724918               | -1.888298 | 2.021562  |
| 38               | 6                | -1.531444               | -3.107763 | 1.852402  |
| 39               | 6                | -2.873890               | -0.695025 | 1.415690  |
| 40               | 6                | -3.529991               | -1.909643 | 0.837887  |
| 41               | 6                | -2.795681               | -3.125712 | 1.369696  |
| 42               | 6                | -1.480005               | -0.730010 | 1.963510  |
| 43               | 1                | -1.080270               | -4.056045 | 2.131998  |
| 44               | 1                | -3.314665               | -4.077533 | 1.297793  |
| 45               | 6                | -0.724918               | -1.888298 | -2.021562 |
| 46               | 6                | -3.529991               | -1.909643 | -0.837887 |
| 47               | 6                | -1.480005               | -0.730010 | -1.963510 |
| 48               | 6                | -2.873890               | -0.695025 | -1.415690 |
| 49               | 6                | -1.531444               | -3.107763 | -1.852402 |
| 50               | 6                | -2.795681               | -3.125712 | -1.369696 |
| 51               | 1                | -1.080270               | -4.056045 | -2.131998 |
| 52               | 1                | -3.314665               | -4.077533 | -1.297793 |
| 53               | 1                | -4.588982               | -1.964699 | -1.117168 |
| 54               | 1                | -4.588982               | -1.964699 | 1.117168  |
| 55               | 6                | 3.529991                | -1.909643 | 0.837887  |
| 56               | 6                | 2.795681                | -3.125712 | 1.369696  |
| 57               | 6                | 1.480005                | -0.730010 | 1.963510  |
| 58               | 6                | 0.724918                | -1.888298 | 2.021562  |
| 59               | 6                | 1.531444                | -3.107763 | 1.852402  |
| 60               | 6                | 2.873890                | -0.695025 | 1.415690  |
| 61               | 1                | 3.314665                | -4.077533 | 1.297793  |
| 62               | 1                | 1.080270                | -4.056045 | 2.131998  |
| 63               | 6                | 3.529991                | -1.909643 | -0.837887 |
| 64               | 6                | 0.724918                | -1.888298 | -2.021562 |

|    |   |           |           |           |
|----|---|-----------|-----------|-----------|
| 65 | 6 | 2.873890  | -0.695025 | -1.415690 |
| 66 | 6 | 1.480005  | -0.730010 | -1.963510 |
| 67 | 6 | 2.795681  | -3.125712 | -1.369696 |
| 68 | 6 | 1.531444  | -3.107763 | -1.852402 |
| 69 | 1 | 3.314665  | -4.077533 | -1.297793 |
| 70 | 1 | 1.080270  | -4.056045 | -2.131998 |
| 71 | 1 | 4.588982  | -1.964699 | -1.117168 |
| 72 | 1 | 4.588982  | -1.964699 | 1.117168  |
| 73 | 3 | -1.357603 | 0.000000  | 0.000000  |
| 74 | 3 | 1.357603  | 0.000000  | 0.000000  |

---
